# Supplementary material for: Novel Alleles for Combined Drought and Heat Stress Tolerance in Wheat
Source: Front Plant Sci. 2020 Jan 31;10:1800. doi: 10.3389/fpls.2019.01800 (PMC7005056; doi:10.3389/fpls.2019.01800)
Supplement: Supplementary file 2 [file Table_2.xlsx]

## Sheet: Table S1
Supplementary Table 1. List of Triticum aestivum accessions.
								Genome wide association study				Nested-association mapping population
Code	Name	Subpopulation	Type	Country of origin	Year of release	Genotypic quality	Maturing type	In 2016 panel	Seed origin	In 2017 panel	Seed origin	Parental line	Seed origin
DPG_081	117/VAR.12-564	2	T. aestivum variety	PAKISTAN	1934	OK	Late maturing	yes	Pilot experiment 2015 (University of Adelaide, Urrbrae, South Australia, Australia)			yes	INRA Spring Wheat Collection
DPG_084	6-1-3	4	T. aestivum	EGYPT	na	OK	Early to mid maturing	yes	Pilot experiment 2015 (University of Adelaide, Urrbrae, South Australia, Australia)	yes	Field trial 2013 (University of Adelaide, Urrbrae, South Australia, Australia)	yes	INRA Spring Wheat Collection
DPG_085	6HRWSN98	Admixed	T. aestivum	CIMMYT	na	OK	Early to mid maturing			yes	Field trial 2013 (University of Adelaide, Urrbrae, South Australia, Australia)
DPG_086	7HRWSN108	1	T. aestivum	CIMMYT	na	OK	Early to mid maturing	yes	Pilot experiment 2015 (University of Adelaide, Urrbrae, South Australia, Australia)	yes	Field trial 2013 (University of Adelaide, Urrbrae, South Australia, Australia)
DPG_097	ACADEMIE DE PEKIN	2	T. aestivum variety	CHINA	na	OK	Early to mid maturing	yes	Pilot experiment 2015 (University of Adelaide, Urrbrae, South Australia, Australia)	yes	Field trial 2013 (University of Adelaide, Urrbrae, South Australia, Australia)	yes	INRA Spring Wheat Collection
DPG_1001	AE.SQUARROSA (327)	Admixed	Synthetic hexaploid (CETA/AE.SQUARROSA (327)//2*JANZ)	MEXICO (CIMMYT)	na	OK	Early to mid maturing			yes	Field trial 2013 (University of Adelaide, Urrbrae, South Australia, Australia)
DPG_1003	AE.SQUARROSA (358)	1	Synthetic hexaploid (SRN/AE.SQUARROSA (358))	MEXICO (CIMMYT)	na	OK	Late maturing	yes	Pilot experiment 2015 (University of Adelaide, Urrbrae, South Australia, Australia)
DPG_1006	AE.SQUARROSA (447)	1	Synthetic hexaploid (DOY1/AE.SQUARROSA (447)//2*CUNNINGHAM)	MEXICO (CIMMYT)	na	OK	Early to mid maturing	yes	Pilot experiment 2015 (University of Adelaide, Urrbrae, South Australia, Australia)	yes	Field trial 2013 (University of Adelaide, Urrbrae, South Australia, Australia)
DPG_1008	AE.SQUARROSA (460)	3	Synthetic hexaploid (YAV79//DACK/RABI/3/SNIPE/4/AE.SQUARROSA (460)/5/EXCALIBUR/6/SUNCO)	MEXICO (CIMMYT)	na	OK	Early to mid maturing			yes	Field trial 2013 (University of Adelaide, Urrbrae, South Australia, Australia)
DPG_1009	AE.SQUARROSA (502)	Admixed	Synthetic hexaploid (STY-US/CELTA//PALS/3/SRN_5/4/AE.SQUARROSA (502))	MEXICO (CIMMYT)	na	OK	Early to mid maturing			yes	Pilot experiment 2015 (University of Adelaide, Urrbrae, South Australia, Australia)
DPG_1011	AE.SQUARROSA (518)	Admixed	Synthetic hexaploid (SCA/AE.SQUARROSA (518))	MEXICO (CIMMYT)	na	OK	Early to mid maturing			yes	Field trial 2013 (University of Adelaide, Urrbrae, South Australia, Australia)
DPG_1012	AE.SQUARROSA (629)	4	Synthetic hexaploid (68.111/RGB-U//WARD/3/FGO/4/RABI/5/AE.SQUARROSA (629)/6/2*FRAME)	MEXICO (CIMMYT)	na	OK	Early to mid maturing	yes	Pilot experiment 2015 (University of Adelaide, Urrbrae, South Australia, Australia)	yes	Field trial 2013 (University of Adelaide, Urrbrae, South Australia, Australia)
DPG_1014	AE.SQUARROSA (878)	Admixed	Synthetic hexaploid (68.111/RGB-U//WARD/3/FGO/4/RABI/5/AE.SQUARROSA (878)/6/2*M5660)	MEXICO (CIMMYT)	na	OK	Early to mid maturing			yes	Field trial 2013 (University of Adelaide, Urrbrae, South Australia, Australia)
DPG_1015	AE.SQUARROSA (895)	1	Synthetic hexaploid (OPATA//CETA/AE.SQ(895))	MEXICO (CIMMYT)	na	OK	Early to mid maturing	yes	Pilot experiment 2015 (University of Adelaide, Urrbrae, South Australia, Australia)	yes	Field trial 2013 (University of Adelaide, Urrbrae, South Australia, Australia)
DPG_1016	AE.SQUARROSA (TAUS)	1	Synthetic hexaploid (TRAP#1/BOW//PFAU/3/VEE/TRAP#1/5/CNDO/R143//ENTE/MEXI_2/3/AEGILOPS SQUARROSA (TAUS)/4/WEAVER)	MEXICO (CIMMYT)	na	OK	Early to mid maturing	yes	Pilot experiment 2015 (University of Adelaide, Urrbrae, South Australia, Australia)	yes	Field trial 2013 (University of Adelaide, Urrbrae, South Australia, Australia)
DPG_103	AFRICA MAYO	na	na	KENYA	na	Not genotyped	Early to mid maturing	yes	Pilot experiment 2015 (University of Adelaide, Urrbrae, South Australia, Australia)			yes	INRA Spring Wheat Collection
DPG_105	AJANA	Admixed	T. aestivum variety	AUSTRALIA (Western Australia)	1998	OK	Early to mid maturing			yes	Field trial 2013 (University of Adelaide, Urrbrae, South Australia, Australia)
DPG_107	ALSEN	4	T. aestivum variety	UNITED STATES	2000	OK	Early to mid maturing	yes	Pilot experiment 2015 (University of Adelaide, Urrbrae, South Australia, Australia)	yes	Field trial 2013 (University of Adelaide, Urrbrae, South Australia, Australia)
DPG_110W	AMC 142	2	T. aestivum landrace	IRAN	na	OK	Early to mid maturing			yes	Field trial 2013 (University of Adelaide, Urrbrae, South Australia, Australia)
DPG_116	ANDES 56	na	na	COLUMBIA	na	Not genotyped	Early to mid maturing	yes	Pilot experiment 2015 (University of Adelaide, Urrbrae, South Australia, Australia)			yes	INRA Spring Wheat Collection
DPG_126	AROONA	3	T. aestivum variety	AUSTRALIA (South Australia)	1981	OK	Early to mid maturing			yes	Field trial 2013 (University of Adelaide, Urrbrae, South Australia, Australia)
DPG_1265	H 1311	2	T. aestivum landrace	na	na	OK	Early to mid maturing			yes	Field trial 2013 (University of Adelaide, Urrbrae, South Australia, Australia)
DPG_1268	H 1359	na	T. aestivum landrace	na	na	>5% missing values	Late maturing	yes	Pilot experiment 2015 (University of Adelaide, Urrbrae, South Australia, Australia)
DPG_138	AUS1490	4	T. aestivum breeding line	AUSTRALIA	na	Unsure	Early to mid maturing	yes	Pilot experiment 2015 (University of Adelaide, Urrbrae, South Australia, Australia)
DPG_139	ASIA MINOR EXPEDITION 71	na	T. aestivum	IRAQ	na	>5% missing values	Early to mid maturing	yes	Pilot experiment 2015 (University of Adelaide, Urrbrae, South Australia, Australia)			yes	In-house collection
DPG_143S	AVOCET	3	T. aestivum variety	AUSTRALIA (New South Wales)	1979	OK	Early to mid maturing			yes	Field trial 2013 (University of Adelaide, Urrbrae, South Australia, Australia)
DPG_145	AXE	Admixed	T. aestivum variety	AUSTRALIA (South Australia)	2007	OK	Early to mid maturing			yes	Field trial 2013 (University of Adelaide, Urrbrae, South Australia, Australia)
DPG_149	Babax	1	T. aestivum variety	MEXICO (CIMMYT)	1992	OK	Early to mid maturing	yes	Pilot experiment 2015 (University of Adelaide, Urrbrae, South Australia, Australia)	yes	Field trial 2013 (University of Adelaide, Urrbrae, South Australia, Australia)
DPG_1491	VOROBEY	1	T. aestivum variety	MEXICO (CIMMYT)	2002	Identical	Early to mid maturing	yes	Pilot experiment 2015 (University of Adelaide, Urrbrae, South Australia, Australia)
DPG_1493	Iraq 1	2	Synthetic hexaploid	IRAQ	na	OK	Early to mid maturing			yes	Field trial 2013 (University of Adelaide, Urrbrae, South Australia, Australia)
DPG_1494	INDIA-227	4	Synthetic hexaploid	PAKISTAN	na	OK	Early to mid maturing	yes	Pilot experiment 2015 (University of Adelaide, Urrbrae, South Australia, Australia)	yes	Field trial 2013 (University of Adelaide, Urrbrae, South Australia, Australia)	yes	In-house collection
DPG_1495	W 98	1	Synthetic hexaploid	PAKISTAN	na	Incorrect	Early to mid maturing	yes	Pilot experiment 2015 (University of Adelaide, Urrbrae, South Australia, Australia)			yes	In-house collection
DPG_1496	H 1703	Admixed	T. aestivum landrace	na	na	OK	Early to mid maturing	yes	Pilot experiment 2015 (University of Adelaide, Urrbrae, South Australia, Australia)	yes	Field trial 2013 (University of Adelaide, Urrbrae, South Australia, Australia)
DPG_1497	Suzuki- 3	1	na	na	na	OK	Early to mid maturing	yes	Pilot experiment 2015 (University of Adelaide, Urrbrae, South Australia, Australia)	yes	Field trial 2013 (University of Adelaide, Urrbrae, South Australia, Australia)
DPG_1498	Suzuki- 9	1	T. aestivum breeding line	na	na	OK	Early to mid maturing	yes	Pilot experiment 2015 (University of Adelaide, Urrbrae, South Australia, Australia)	yes	Field trial 2013 (University of Adelaide, Urrbrae, South Australia, Australia)
DPG_1499	Suzuki-12	1	T. aestivum breeding line	na	na	OK	Early to mid maturing	yes	Pilot experiment 2015 (University of Adelaide, Urrbrae, South Australia, Australia)	yes	Field trial 2013 (University of Adelaide, Urrbrae, South Australia, Australia)
DPG_1500	Suzuki-17	1	T. aestivum breeding line	na	na	OK	Early to mid maturing	yes	Pilot experiment 2015 (University of Adelaide, Urrbrae, South Australia, Australia)	yes	Field trial 2013 (University of Adelaide, Urrbrae, South Australia, Australia)
DPG_1501	cid473259sid70	1	T. aestivum breeding line	MEXICO (CIMMYT)	na	Identical	Early to mid maturing	yes	Pilot experiment 2015 (University of Adelaide, Urrbrae, South Australia, Australia)			yes	TIP3_CIMMYT-ACPFG Suzuky heat set MTA signed by Mike
DPG_1502	cid460354sid132	1	T. aestivum breeding line	MEXICO (CIMMYT)	na	OK	Early to mid maturing	yes	Pilot experiment 2015 (University of Adelaide, Urrbrae, South Australia, Australia)	yes	Field trial 2013 (University of Adelaide, Urrbrae, South Australia, Australia)	yes	TIP3_CIMMYT-ACPFG Suzuky heat set MTA signed by Mike
DPG_151	BAHATANE 87	4	T. aestivum variety	ALGERIA	na	OK	Late maturing	yes	Pilot experiment 2015 (University of Adelaide, Urrbrae, South Australia, Australia)			yes	INRA Spring Wheat Collection
DPG_154	BARHAM	4	T. aestivum variety	AUSTRALIA (Victoria)	2006	OK	Early to mid maturing	yes	Pilot experiment 2015 (University of Adelaide, Urrbrae, South Australia, Australia)	yes	Field trial 2013 (University of Adelaide, Urrbrae, South Australia, Australia)
DPG_157	Bass	3	T. aestivum variety	AUSTRALIA (Queensland)	1983	OK	Early to mid maturing			yes	Field trial 2013 (University of Adelaide, Urrbrae, South Australia, Australia)
DPG_159	BAXTER	3	T. aestivum variety	AUSTRALIA (Queensland)	1998	OK	Early to mid maturing			yes	Field trial 2013 (University of Adelaide, Urrbrae, South Australia, Australia)
DPG_161	Bencubbin	4	T. aestivum variety	AUSTRALIA (Western Australia)	1929	OK	Early to mid maturing	yes	Pilot experiment 2015 (University of Adelaide, Urrbrae, South Australia, Australia)	yes	Field trial 2013 (University of Adelaide, Urrbrae, South Australia, Australia)
DPG_162	BERKUT	1	T. aestivum variety	MEXICO (CIMMYT)	2002	OK	Early to mid maturing	yes	Pilot experiment 2015 (University of Adelaide, Urrbrae, South Australia, Australia)	yes	Field trial 2013 (University of Adelaide, Urrbrae, South Australia, Australia)
DPG_166	BODALLIN	1	T. aestivum variety	AUSTRALIA (Western Australia)	1982	OK	Early to mid maturing	yes	Pilot experiment 2015 (University of Adelaide, Urrbrae, South Australia, Australia)	yes	Field trial 2013 (University of Adelaide, Urrbrae, South Australia, Australia)
DPG_173	BT2277	1	T. aestivum breeding line	TUNISIA	na	OK	Early to mid maturing	yes	Pilot experiment 2015 (University of Adelaide, Urrbrae, South Australia, Australia)	yes	Field trial 2013 (University of Adelaide, Urrbrae, South Australia, Australia)	yes	INRA Spring Wheat Collection
DPG_174	BT2281	1	T. aestivum variety	TUNISIA	1972	OK	Early to mid maturing	yes	Pilot experiment 2015 (University of Adelaide, Urrbrae, South Australia, Australia)	yes	Field trial 2013 (University of Adelaide, Urrbrae, South Australia, Australia)	yes	INRA Spring Wheat Collection
DPG_175	BUCK ATLANTICO	Admixed	T. aestivum variety	ARGENTINA	1956	OK	Early to mid maturing	yes	Pilot experiment 2015 (University of Adelaide, Urrbrae, South Australia, Australia)	yes	Field trial 2013 (University of Adelaide, Urrbrae, South Australia, Australia)	yes	INRA Spring Wheat Collection
DPG_176	BUCKBUCK'S	Admixed	T. aestivum variety	MEXICO (CIMMYT)	1980	OK	Early to mid maturing	yes	Pilot experiment 2015 (University of Adelaide, Urrbrae, South Australia, Australia)	yes	Field trial 2013 (University of Adelaide, Urrbrae, South Australia, Australia)	yes	INRA Spring Wheat Collection
DPG_177	BUCKLEY	4	T. aestivum variety	AUSTRALIA (South Australia)	1997	OK	Early to mid maturing	yes	Pilot experiment 2015 (University of Adelaide, Urrbrae, South Australia, Australia)	yes	Field trial 2013 (University of Adelaide, Urrbrae, South Australia, Australia)
DPG_179	Bungulla	4	T. aestivum variety	AUSTRALIA (Western Australia)	1939	OK	Early to mid maturing	yes	Pilot experiment 2015 (University of Adelaide, Urrbrae, South Australia, Australia)	yes	Field trial 2013 (University of Adelaide, Urrbrae, South Australia, Australia)
DPG_180	BURRION	Admixed	T. aestivum variety	MEXICO (CIMMYT)	1988	OK	Early to mid maturing			yes	Field trial 2013 (University of Adelaide, Urrbrae, South Australia, Australia)
DPG_182	CADOUX	4	T. aestivum variety	AUSTRALIA (Western Australia)	1992	OK	Early to mid maturing	yes	Pilot experiment 2015 (University of Adelaide, Urrbrae, South Australia, Australia)	yes	Field trial 2013 (University of Adelaide, Urrbrae, South Australia, Australia)
DPG_183	CALINGIRI	Admixed	T. aestivum variety	AUSTRALIA (Western Australia)	1997	OK	Early to mid maturing			yes	Field trial 2013 (University of Adelaide, Urrbrae, South Australia, Australia)
DPG_192	CARNAMAH	1	T. aestivum variety	AUSTRALIA (Western Australia)	1996	OK	Early to mid maturing	yes	Pilot experiment 2015 (University of Adelaide, Urrbrae, South Australia, Australia)	yes	Field trial 2013 (University of Adelaide, Urrbrae, South Australia, Australia)
DPG_194	CASCADES	Admixed	T. aestivum variety	AUSTRALIA (Western Australia)	1994	OK	Early to mid maturing			yes	Field trial 2013 (University of Adelaide, Urrbrae, South Australia, Australia)
DPG_196	LONGREACH CATALINA	Admixed	T. aestivum variety	AUSTRALIA (Victoria)	2007	OK	Early to mid maturing			yes	Field trial 2013 (University of Adelaide, Urrbrae, South Australia, Australia)
DPG_197	CD 87	3	T. aestivum breeding line	AUSTRALIA	na	OK	Early to mid maturing			yes	Field trial 2013 (University of Adelaide, Urrbrae, South Australia, Australia)
DPG_203	CHARA	3	T. aestivum variety	AUSTRALIA (Victoria)	1998	OK	Early to mid maturing			yes	Field trial 2013 (University of Adelaide, Urrbrae, South Australia, Australia)
DPG_204	Chinese Spring	2	T. aestivum variety	CHINA	na	OK	Early to mid maturing			yes	Field trial 2013 (University of Adelaide, Urrbrae, South Australia, Australia)
DPG_206	CHUAN MAI 18	Admixed	T. aestivum variety	CHINA	1965	OK	Early to mid maturing			yes	Field trial 2013 (University of Adelaide, Urrbrae, South Australia, Australia)
DPG_208	CIANO 79	1	T. aestivum variety	MEXICO (CIMMYT)	1979	OK	Early to mid maturing	yes	Pilot experiment 2015 (University of Adelaide, Urrbrae, South Australia, Australia)	yes	Field trial 2013 (University of Adelaide, Urrbrae, South Australia, Australia)	yes	Australian Grains Genebank
DPG_209	cid181178sid3	2	T. aestivum breeding line	MEXICO (CIMMYT)	na	OK	Early to mid maturing			yes	Field trial 2013 (University of Adelaide, Urrbrae, South Australia, Australia)
DPG_212	cid183347sid7	2	T. aestivum breeding line	MEXICO (CIMMYT)	na	OK	Early to mid maturing			yes	Field trial 2013 (University of Adelaide, Urrbrae, South Australia, Australia)
DPG_213	cid183961sid5	1	T. aestivum breeding line	MEXICO (CIMMYT)	na	>5% missing values	Early to mid maturing	yes	Pilot experiment 2015 (University of Adelaide, Urrbrae, South Australia, Australia)			yes	TIP3_CIMMYT-ACPFG Suzuky heat set MTA signed by Mike
DPG_214	cid192646sid0	1	T. aestivum breeding line	MEXICO (CIMMYT)	na	OK	Early to mid maturing	yes	Pilot experiment 2015 (University of Adelaide, Urrbrae, South Australia, Australia)	yes	Field trial 2013 (University of Adelaide, Urrbrae, South Australia, Australia)
DPG_216	cid20569sid929	na	T. aestivum breeding line	MEXICO (CIMMYT)	na	>5% missing values	Early to mid maturing	yes	Pilot experiment 2015 (University of Adelaide, Urrbrae, South Australia, Australia)
DPG_217	cid20570sid926	1	T. aestivum breeding line	MEXICO (CIMMYT)	na	OK	Early to mid maturing	yes	Pilot experiment 2015 (University of Adelaide, Urrbrae, South Australia, Australia)	yes	Field trial 2013 (University of Adelaide, Urrbrae, South Australia, Australia)
DPG_218	cid257170sid21	1	T. aestivum breeding line	MEXICO (CIMMYT)	na	OK	Early to mid maturing	yes	Pilot experiment 2015 (University of Adelaide, Urrbrae, South Australia, Australia)	yes	Field trial 2013 (University of Adelaide, Urrbrae, South Australia, Australia)
DPG_219	cid260142sid43	1	T. aestivum breeding line	MEXICO (CIMMYT)	na	Identical	Early to mid maturing	yes	Pilot experiment 2015 (University of Adelaide, Urrbrae, South Australia, Australia)
DPG_220	cid279807sid86	Admixed	T. aestivum breeding line	MEXICO (CIMMYT)	na	OK	Early to mid maturing			yes	Field trial 2013 (University of Adelaide, Urrbrae, South Australia, Australia)
DPG_221	cid279818sid83	4	T. aestivum breeding line	MEXICO (CIMMYT)	na	Unsure	Early to mid maturing	yes	Pilot experiment 2015 (University of Adelaide, Urrbrae, South Australia, Australia)
DPG_222	cid279826sid63	1	T. aestivum breeding line	MEXICO (CIMMYT)	na	OK	Early to mid maturing	yes	Pilot experiment 2015 (University of Adelaide, Urrbrae, South Australia, Australia)	yes	Field trial 2013 (University of Adelaide, Urrbrae, South Australia, Australia)
DPG_223	cid306547sid131	1	T. aestivum breeding line	MEXICO (CIMMYT)	na	OK	Early to mid maturing	yes	Pilot experiment 2015 (University of Adelaide, Urrbrae, South Australia, Australia)	yes	Field trial 2013 (University of Adelaide, Urrbrae, South Australia, Australia)
DPG_225	cid325362sid63	1	T. aestivum breeding line	MEXICO (CIMMYT)	na	OK	Early to mid maturing	yes	Pilot experiment 2015 (University of Adelaide, Urrbrae, South Australia, Australia)	yes	Field trial 2013 (University of Adelaide, Urrbrae, South Australia, Australia)
DPG_226	cid334938sid1119	na	T. aestivum breeding line	MEXICO (CIMMYT)	na	>5% missing values	Early to mid maturing	yes	Pilot experiment 2015 (University of Adelaide, Urrbrae, South Australia, Australia)
DPG_227	cid335446sid92	1	T. aestivum breeding line	MEXICO (CIMMYT)	na	OK	Early to mid maturing	yes	Pilot experiment 2015 (University of Adelaide, Urrbrae, South Australia, Australia)	yes	Field trial 2013 (University of Adelaide, Urrbrae, South Australia, Australia)
DPG_228	cid373279sid61	1	T. aestivum breeding line	MEXICO (CIMMYT)	na	OK	Early to mid maturing	yes	Pilot experiment 2015 (University of Adelaide, Urrbrae, South Australia, Australia)	yes	Field trial 2013 (University of Adelaide, Urrbrae, South Australia, Australia)
DPG_230	cid385184sid26	1	T. aestivum breeding line	MEXICO (CIMMYT)	na	OK	Early to mid maturing	yes	Pilot experiment 2015 (University of Adelaide, Urrbrae, South Australia, Australia)	yes	Field trial 2013 (University of Adelaide, Urrbrae, South Australia, Australia)
DPG_231	cid388327sid117	1	T. aestivum breeding line	MEXICO (CIMMYT)	na	OK	Early to mid maturing	yes	Pilot experiment 2015 (University of Adelaide, Urrbrae, South Australia, Australia)	yes	Field trial 2013 (University of Adelaide, Urrbrae, South Australia, Australia)
DPG_232	cid388384sid40	Admixed	T. aestivum breeding line	MEXICO (CIMMYT)	na	OK	Early to mid maturing			yes	Field trial 2013 (University of Adelaide, Urrbrae, South Australia, Australia)
DPG_233	cid388408sid65	1	T. aestivum breeding line	MEXICO (CIMMYT)	na	OK	Early to mid maturing	yes	Pilot experiment 2015 (University of Adelaide, Urrbrae, South Australia, Australia)	yes	Field trial 2013 (University of Adelaide, Urrbrae, South Australia, Australia)
DPG_234	cid388412sid46	1	T. aestivum breeding line	MEXICO (CIMMYT)	na	OK	Early to mid maturing	yes	Pilot experiment 2015 (University of Adelaide, Urrbrae, South Australia, Australia)	yes	Field trial 2013 (University of Adelaide, Urrbrae, South Australia, Australia)
DPG_235	cid388436sid70	na	T. aestivum breeding line	MEXICO (CIMMYT)	na	>5% missing values	Early to mid maturing	yes	Pilot experiment 2015 (University of Adelaide, Urrbrae, South Australia, Australia)
DPG_236	cid388444sid89	1	T. aestivum breeding line	MEXICO (CIMMYT)	na	OK	Early to mid maturing	yes	Pilot experiment 2015 (University of Adelaide, Urrbrae, South Australia, Australia)	yes	Field trial 2013 (University of Adelaide, Urrbrae, South Australia, Australia)
DPG_237	cid394062sid22	1	T. aestivum breeding line	MEXICO (CIMMYT)	na	OK	Early to mid maturing	yes	Pilot experiment 2015 (University of Adelaide, Urrbrae, South Australia, Australia)	yes	Field trial 2013 (University of Adelaide, Urrbrae, South Australia, Australia)
DPG_238	cid394070sid114	1	T. aestivum breeding line	MEXICO (CIMMYT)	na	OK	Early to mid maturing	yes	Pilot experiment 2015 (University of Adelaide, Urrbrae, South Australia, Australia)	yes	Field trial 2013 (University of Adelaide, Urrbrae, South Australia, Australia)
DPG_239	cid394087sid30	1	T. aestivum breeding line	MEXICO (CIMMYT)	na	Identical	Early to mid maturing	yes	Pilot experiment 2015 (University of Adelaide, Urrbrae, South Australia, Australia)			yes	TIP3_CIMMYT-ACPFG Suzuky heat set MTA signed by Mike
DPG_240	cid394715sid160	1	T. aestivum breeding line	Kenya	na	OK	Early to mid maturing	yes	Pilot experiment 2015 (University of Adelaide, Urrbrae, South Australia, Australia)	yes	Pilot experiment 2015 (University of Adelaide, Urrbrae, South Australia, Australia)
DPG_241	cid394799sid20	1	T. aestivum breeding line	MEXICO (CIMMYT)	na	OK	Early to mid maturing	yes	Pilot experiment 2015 (University of Adelaide, Urrbrae, South Australia, Australia)	yes	Field trial 2013 (University of Adelaide, Urrbrae, South Australia, Australia)
DPG_242	cid399013sid209	1	T. aestivum breeding line	MEXICO (CIMMYT)	na	OK	Early to mid maturing	yes	Pilot experiment 2015 (University of Adelaide, Urrbrae, South Australia, Australia)	yes	Field trial 2013 (University of Adelaide, Urrbrae, South Australia, Australia)
DPG_243	cid399062sid49	1	T. aestivum breeding line	MEXICO (CIMMYT)	na	OK	Early to mid maturing	yes	Pilot experiment 2015 (University of Adelaide, Urrbrae, South Australia, Australia)	yes	Field trial 2013 (University of Adelaide, Urrbrae, South Australia, Australia)
DPG_244	cid420707sid98	1	T. aestivum breeding line	MEXICO (CIMMYT)	na	OK	Early to mid maturing	yes	Pilot experiment 2015 (University of Adelaide, Urrbrae, South Australia, Australia)	yes	Pilot experiment 2015 (University of Adelaide, Urrbrae, South Australia, Australia)
DPG_245	cid423295sid45	1	T. aestivum breeding line	MEXICO (CIMMYT)	na	OK	Early to mid maturing	yes	Pilot experiment 2015 (University of Adelaide, Urrbrae, South Australia, Australia)	yes	Field trial 2013 (University of Adelaide, Urrbrae, South Australia, Australia)
DPG_246	cid425852sid48	1	T. aestivum breeding line	MEXICO (CIMMYT)	na	OK	Early to mid maturing	yes	Pilot experiment 2015 (University of Adelaide, Urrbrae, South Australia, Australia)	yes	Field trial 2013 (University of Adelaide, Urrbrae, South Australia, Australia)
DPG_247	cid425878sid86	1	T. aestivum breeding line	MEXICO (CIMMYT)	na	OK	Early to mid maturing	yes	Pilot experiment 2015 (University of Adelaide, Urrbrae, South Australia, Australia)	yes	Field trial 2013 (University of Adelaide, Urrbrae, South Australia, Australia)
DPG_248	cid427658sid33	1	T. aestivum breeding line	MEXICO (CIMMYT)	na	OK	Early to mid maturing	yes	Pilot experiment 2015 (University of Adelaide, Urrbrae, South Australia, Australia)	yes	Field trial 2013 (University of Adelaide, Urrbrae, South Australia, Australia)
DPG_249	cid427887sid0	1	T. aestivum breeding line	MEXICO (CIMMYT)	na	OK	Early to mid maturing	yes	Pilot experiment 2015 (University of Adelaide, Urrbrae, South Australia, Australia)	yes	Field trial 2013 (University of Adelaide, Urrbrae, South Australia, Australia)
DPG_250	cid427898sid67	1	T. aestivum breeding line	MEXICO (CIMMYT)	na	OK	Early to mid maturing	yes	Pilot experiment 2015 (University of Adelaide, Urrbrae, South Australia, Australia)	yes	Field trial 2013 (University of Adelaide, Urrbrae, South Australia, Australia)
DPG_251	cid428587sid159	1	T. aestivum breeding line	MEXICO (CIMMYT)	na	OK	Early to mid maturing	yes	Pilot experiment 2015 (University of Adelaide, Urrbrae, South Australia, Australia)	yes	Field trial 2013 (University of Adelaide, Urrbrae, South Australia, Australia)
DPG_253	cid428592sid124	1	T. aestivum breeding line	MEXICO (CIMMYT)	na	OK	Early to mid maturing	yes	Pilot experiment 2015 (University of Adelaide, Urrbrae, South Australia, Australia)	yes	Field trial 2013 (University of Adelaide, Urrbrae, South Australia, Australia)
DPG_254	cid428603sid31	1	T. aestivum breeding line	MEXICO (CIMMYT)	na	Identical	Early to mid maturing	yes	Pilot experiment 2015 (University of Adelaide, Urrbrae, South Australia, Australia)			yes	TIP3_CIMMYT-ACPFG Suzuky heat set MTA signed by Mike
DPG_255	cid431763sid639	1	T. aestivum breeding line	MEXICO (CIMMYT)	na	OK	Early to mid maturing	yes	Pilot experiment 2015 (University of Adelaide, Urrbrae, South Australia, Australia)	yes	Field trial 2013 (University of Adelaide, Urrbrae, South Australia, Australia)
DPG_256	cid431798sid387	1	T. aestivum breeding line	MEXICO (CIMMYT)	na	OK	Early to mid maturing	yes	Pilot experiment 2015 (University of Adelaide, Urrbrae, South Australia, Australia)	yes	Field trial 2013 (University of Adelaide, Urrbrae, South Australia, Australia)
DPG_257	cid431801sid446	na	T. aestivum breeding line	MEXICO (CIMMYT)	na	>5% missing values	Early to mid maturing	yes	Pilot experiment 2015 (University of Adelaide, Urrbrae, South Australia, Australia)
DPG_260	cid435275sid65	na	T. aestivum breeding line	MEXICO (CIMMYT)	na	>5% missing values	Early to mid maturing	yes	Pilot experiment 2015 (University of Adelaide, Urrbrae, South Australia, Australia)
DPG_261	cid435303sid61	1	T. aestivum breeding line	MEXICO (CIMMYT)	na	OK	Early to mid maturing	yes	Pilot experiment 2015 (University of Adelaide, Urrbrae, South Australia, Australia)	yes	Field trial 2013 (University of Adelaide, Urrbrae, South Australia, Australia)
DPG_262	cid437242sid88	na	T. aestivum breeding line	MEXICO (CIMMYT)	na	>5% missing values	Early to mid maturing	yes	Pilot experiment 2015 (University of Adelaide, Urrbrae, South Australia, Australia)
DPG_266	cid452470sid102	1	T. aestivum breeding line	MEXICO (CIMMYT)	na	OK	Early to mid maturing	yes	Pilot experiment 2015 (University of Adelaide, Urrbrae, South Australia, Australia)	yes	Field trial 2013 (University of Adelaide, Urrbrae, South Australia, Australia)
DPG_268	cid460334sid63	1	T. aestivum breeding line	MEXICO (CIMMYT)	na	OK	Early to mid maturing	yes	Pilot experiment 2015 (University of Adelaide, Urrbrae, South Australia, Australia)	yes	Field trial 2013 (University of Adelaide, Urrbrae, South Australia, Australia)
DPG_269	cid460342sid40	1	T. aestivum breeding line	MEXICO (CIMMYT)	na	OK	Early to mid maturing	yes	Pilot experiment 2015 (University of Adelaide, Urrbrae, South Australia, Australia)	yes	Field trial 2013 (University of Adelaide, Urrbrae, South Australia, Australia)
DPG_270	cid460344sid158	1	T. aestivum breeding line	MEXICO (CIMMYT)	na	OK	Early to mid maturing	yes	Pilot experiment 2015 (University of Adelaide, Urrbrae, South Australia, Australia)	yes	Field trial 2013 (University of Adelaide, Urrbrae, South Australia, Australia)
DPG_272	cid460354sid105	1	T. aestivum breeding line	MEXICO (CIMMYT)	na	OK	Early to mid maturing	yes	Pilot experiment 2015 (University of Adelaide, Urrbrae, South Australia, Australia)	yes	Field trial 2013 (University of Adelaide, Urrbrae, South Australia, Australia)
DPG_273	cid460356sid168	1	T. aestivum breeding line	MEXICO (CIMMYT)	na	OK	Early to mid maturing	yes	Pilot experiment 2015 (University of Adelaide, Urrbrae, South Australia, Australia)	yes	Field trial 2013 (University of Adelaide, Urrbrae, South Australia, Australia)
DPG_275	cid460360sid38	na	T. aestivum breeding line	MEXICO (CIMMYT)	na	>5% missing values	Early to mid maturing	yes	Pilot experiment 2015 (University of Adelaide, Urrbrae, South Australia, Australia)
DPG_276	cid460396sid87	1	T. aestivum breeding line	MEXICO (CIMMYT)	na	OK	Early to mid maturing	yes	Pilot experiment 2015 (University of Adelaide, Urrbrae, South Australia, Australia)	yes	Field trial 2013 (University of Adelaide, Urrbrae, South Australia, Australia)
DPG_277	cid463491sid196	1	T. aestivum breeding line	MEXICO (CIMMYT)	na	OK	Early to mid maturing	yes	Pilot experiment 2015 (University of Adelaide, Urrbrae, South Australia, Australia)	yes	Field trial 2013 (University of Adelaide, Urrbrae, South Australia, Australia)
DPG_278	cid463508sid200	1	T. aestivum breeding line	MEXICO (CIMMYT)	na	OK	Early to mid maturing	yes	Pilot experiment 2015 (University of Adelaide, Urrbrae, South Australia, Australia)	yes	Field trial 2013 (University of Adelaide, Urrbrae, South Australia, Australia)
DPG_279	cid472868sid38	1	T. aestivum breeding line	MEXICO (CIMMYT)	na	OK	Early to mid maturing	yes	Pilot experiment 2015 (University of Adelaide, Urrbrae, South Australia, Australia)	yes	Field trial 2013 (University of Adelaide, Urrbrae, South Australia, Australia)
DPG_280	cid472918sid54	1	T. aestivum breeding line	MEXICO (CIMMYT)	na	Unsure	Early to mid maturing	yes	Pilot experiment 2015 (University of Adelaide, Urrbrae, South Australia, Australia)
DPG_281	cid472923sid71	1	T. aestivum breeding line	MEXICO (CIMMYT)	na	OK	Early to mid maturing	yes	Pilot experiment 2015 (University of Adelaide, Urrbrae, South Australia, Australia)	yes	Pilot experiment 2015 (University of Adelaide, Urrbrae, South Australia, Australia)
DPG_282	cid472924sid40	1	T. aestivum breeding line	MEXICO (CIMMYT)	na	OK	Early to mid maturing	yes	Pilot experiment 2015 (University of Adelaide, Urrbrae, South Australia, Australia)	yes	Field trial 2013 (University of Adelaide, Urrbrae, South Australia, Australia)
DPG_283	cid472927sid53	1	T. aestivum breeding line	MEXICO (CIMMYT)	na	OK	Early to mid maturing	yes	Pilot experiment 2015 (University of Adelaide, Urrbrae, South Australia, Australia)	yes	Field trial 2013 (University of Adelaide, Urrbrae, South Australia, Australia)
DPG_284	cid473237sid34	1	T. aestivum breeding line	MEXICO (CIMMYT)	na	Unsure	Early to mid maturing	yes	Pilot experiment 2015 (University of Adelaide, Urrbrae, South Australia, Australia)
DPG_285	cid473243sid61	1	T. aestivum breeding line	MEXICO (CIMMYT)	na	OK	Early to mid maturing	yes	Pilot experiment 2015 (University of Adelaide, Urrbrae, South Australia, Australia)	yes	Field trial 2013 (University of Adelaide, Urrbrae, South Australia, Australia)
DPG_286	cid473245sid56	1	T. aestivum breeding line	MEXICO (CIMMYT)	na	OK	Early to mid maturing	yes	Pilot experiment 2015 (University of Adelaide, Urrbrae, South Australia, Australia)	yes	Field trial 2013 (University of Adelaide, Urrbrae, South Australia, Australia)
DPG_287	cid473247sid51	1	T. aestivum breeding line	MEXICO (CIMMYT)	na	OK	Early to mid maturing	yes	Pilot experiment 2015 (University of Adelaide, Urrbrae, South Australia, Australia)	yes	Field trial 2013 (University of Adelaide, Urrbrae, South Australia, Australia)
DPG_288	cid473248sid51	1	T. aestivum breeding line	MEXICO (CIMMYT)	na	OK	Early to mid maturing	yes	Pilot experiment 2015 (University of Adelaide, Urrbrae, South Australia, Australia)	yes	Field trial 2013 (University of Adelaide, Urrbrae, South Australia, Australia)
DPG_289	cid473251sid35	1	T. aestivum breeding line	MEXICO (CIMMYT)	na	OK	Early to mid maturing	yes	Pilot experiment 2015 (University of Adelaide, Urrbrae, South Australia, Australia)	yes	Field trial 2013 (University of Adelaide, Urrbrae, South Australia, Australia)
DPG_290	cid473259sid69	1	T. aestivum breeding line	MEXICO (CIMMYT)	na	Identical	Early to mid maturing	yes	Pilot experiment 2015 (University of Adelaide, Urrbrae, South Australia, Australia)			yes	TIP3_CIMMYT-ACPFG Suzuky heat set MTA signed by Mike
DPG_291	cid473269sid30	1	T. aestivum breeding line	MEXICO (CIMMYT)	na	OK	Early to mid maturing	yes	Pilot experiment 2015 (University of Adelaide, Urrbrae, South Australia, Australia)	yes	Field trial 2013 (University of Adelaide, Urrbrae, South Australia, Australia)
DPG_293	cid480829sid70	1	T. aestivum breeding line	MEXICO (CIMMYT)	na	OK	Early to mid maturing	yes	Pilot experiment 2015 (University of Adelaide, Urrbrae, South Australia, Australia)	yes	Field trial 2013 (University of Adelaide, Urrbrae, South Australia, Australia)
DPG_294	cid486216sid209	na	T. aestivum breeding line	MEXICO (CIMMYT)	na	>5% missing values	Early to mid maturing	yes	Pilot experiment 2015 (University of Adelaide, Urrbrae, South Australia, Australia)
DPG_295	cid6831sid90	1	T. aestivum breeding line	MEXICO (CIMMYT)	na	Identical	Early to mid maturing	yes	Pilot experiment 2015 (University of Adelaide, Urrbrae, South Australia, Australia)
DPG_296	cid69587sid58	1	T. aestivum breeding line	MEXICO (CIMMYT)	na	OK	Early to mid maturing	yes	Pilot experiment 2015 (University of Adelaide, Urrbrae, South Australia, Australia)	yes	Field trial 2013 (University of Adelaide, Urrbrae, South Australia, Australia)
DPG_297	cid72726sid102	1	T. aestivum breeding line	MEXICO (CIMMYT)	na	OK	Early to mid maturing	yes	Pilot experiment 2015 (University of Adelaide, Urrbrae, South Australia, Australia)	yes	Field trial 2013 (University of Adelaide, Urrbrae, South Australia, Australia)
DPG_298	cid7401sid122	1	T. aestivum breeding line	MEXICO (CIMMYT)	na	OK	Early to mid maturing	yes	Pilot experiment 2015 (University of Adelaide, Urrbrae, South Australia, Australia)	yes	Field trial 2013 (University of Adelaide, Urrbrae, South Australia, Australia)
DPG_299	cid7506sid110	1	T. aestivum breeding line	ARGENTINA	na	OK	Early to mid maturing	yes	Pilot experiment 2015 (University of Adelaide, Urrbrae, South Australia, Australia)	yes	Field trial 2013 (University of Adelaide, Urrbrae, South Australia, Australia)
DPG_301	cid82996sid44	1	T. aestivum breeding line	MEXICO (CIMMYT)	na	OK	Early to mid maturing	yes	Pilot experiment 2015 (University of Adelaide, Urrbrae, South Australia, Australia)	yes	Field trial 2013 (University of Adelaide, Urrbrae, South Australia, Australia)
DPG_302	cid8626sid502	1	T. aestivum breeding line	MEXICO (CIMMYT)	na	Identical	Early to mid maturing	yes	Pilot experiment 2015 (University of Adelaide, Urrbrae, South Australia, Australia)
DPG_303	cid91078sid341	1	T. aestivum breeding line	MEXICO (CIMMYT)	na	OK	Early to mid maturing	yes	Pilot experiment 2015 (University of Adelaide, Urrbrae, South Australia, Australia)	yes	Field trial 2013 (University of Adelaide, Urrbrae, South Australia, Australia)
DPG_304	cid94795sid11	4	T. aestivum breeding line	MEXICO (CIMMYT)	na	OK	Early to mid maturing	yes	Pilot experiment 2015 (University of Adelaide, Urrbrae, South Australia, Australia)	yes	Field trial 2013 (University of Adelaide, Urrbrae, South Australia, Australia)
DPG_306	CLEARFIELD JNZ	3	T. aestivum variety	AUSTRALIA (Victoria)	2001	OK	Early to mid maturing			yes	Field trial 2013 (University of Adelaide, Urrbrae, South Australia, Australia)
DPG_307	CLEOPATRA	Admixed	T. aestivum variety	MEXICO (CIMMYT)	1986	OK	Early to mid maturing			yes	Field trial 2013 (University of Adelaide, Urrbrae, South Australia, Australia)
DPG_312	Combination III	4	T. aestivum variety	AUSTRALIA (New South Wales)	1969	OK	Early to mid maturing	yes	Pilot experiment 2015 (University of Adelaide, Urrbrae, South Australia, Australia)	yes	Field trial 2013 (University of Adelaide, Urrbrae, South Australia, Australia)
DPG_316	COPPADRA	2	T. aestivum	TURKEY	na	Unsure	Late maturing	yes	Pilot experiment 2015 (University of Adelaide, Urrbrae, South Australia, Australia)			yes	INRA Spring Wheat Collection
DPG_318	CORRELL	4	T. aestivum variety	AUSTRALIA (South Australia)	2006	Unsure	Early to mid maturing	yes	Pilot experiment 2015 (University of Adelaide, Urrbrae, South Australia, Australia)
DPG_327	CRANBROOK	1	T. aestivum variety	AUSTRALIA (Western Australia)	1985	OK	Early to mid maturing	yes	Pilot experiment 2015 (University of Adelaide, Urrbrae, South Australia, Australia)	yes	Field trial 2013 (University of Adelaide, Urrbrae, South Australia, Australia)
DPG_329	LONGREACH CRUSADER	1	T. aestivum variety	AUSTRALIA	2008	OK	Early to mid maturing	yes	Pilot experiment 2015 (University of Adelaide, Urrbrae, South Australia, Australia)	yes	Field trial 2013 (University of Adelaide, Urrbrae, South Australia, Australia)
DPG_332	Cul 1	4	T. aestivum	KAZAKHSTAN	na	OK	Late maturing	yes	Pilot experiment 2015 (University of Adelaide, Urrbrae, South Australia, Australia)
DPG_333	Cul 10	2	T. aestivum	KAZAKHSTAN	na	Unsure	Late maturing	yes	Pilot experiment 2015 (University of Adelaide, Urrbrae, South Australia, Australia)			yes	In-house collection
DPG_340	Cul 8	4	T. aestivum	KAZAKHSTAN	na	OK	Late maturing	yes	Pilot experiment 2015 (University of Adelaide, Urrbrae, South Australia, Australia)
DPG_341	Cul 9	4	T. aestivum	KAZAKHSTAN	na	OK	Late maturing	yes	Pilot experiment 2015 (University of Adelaide, Urrbrae, South Australia, Australia)			yes	In-house collection
DPG_342	CUNNINGHAM	3	T. aestivum variety	AUSTRALIA (Queensland)	1990	OK	Early to mid maturing			yes	Field trial 2013 (University of Adelaide, Urrbrae, South Australia, Australia)
DPG_343	Currawa	4	T. aestivum variety	AUSTRALIA (Victoria)	1912	OK	Late maturing	yes	Pilot experiment 2015 (University of Adelaide, Urrbrae, South Australia, Australia)
DPG_390	DAERAAD	na	na	SOUTH AFRICA	na	Not genotyped	Early to mid maturing	yes	Pilot experiment 2015 (University of Adelaide, Urrbrae, South Australia, Australia)			yes	INRA Spring Wheat Collection
DPG_391	DAGGER	4	T. aestivum variety	AUSTRALIA (South Australia)	1983	OK	Early to mid maturing	yes	Pilot experiment 2015 (University of Adelaide, Urrbrae, South Australia, Australia)	yes	Field trial 2013 (University of Adelaide, Urrbrae, South Australia, Australia)
DPG_397	DIAMONDBIRD	1	T. aestivum variety	AUSTRALIA (New South Wales)	1997	OK	Early to mid maturing	yes	Pilot experiment 2015 (University of Adelaide, Urrbrae, South Australia, Australia)	yes	Field trial 2013 (University of Adelaide, Urrbrae, South Australia, Australia)
DPG_399	DIRK	4	T. aestivum variety	AUSTRALIA (South Australia)	1951	OK	Early to mid maturing	yes	Pilot experiment 2015 (University of Adelaide, Urrbrae, South Australia, Australia)	yes	Field trial 2013 (University of Adelaide, Urrbrae, South Australia, Australia)
DPG_401	Dollarbird	1	T. aestivum variety	AUSTRALIA (New South Wales)	1987	Incorrect	Early to mid maturing	yes	Pilot experiment 2015 (University of Adelaide, Urrbrae, South Australia, Australia)
DPG_404	DRYSDALE	1	T. aestivum variety	AUSTRALIA (Victoria)	2001	OK	Early to mid maturing	yes	Pilot experiment 2015 (University of Adelaide, Urrbrae, South Australia, Australia)	yes	Field trial 2013 (University of Adelaide, Urrbrae, South Australia, Australia)
DPG_405	Du Toits	4	T. aestivum variety	AUSTRALIA (South Australia)	1881	OK	Late maturing	yes	Pilot experiment 2015 (University of Adelaide, Urrbrae, South Australia, Australia)
DPG_407	Dundee	4	T. aestivum variety	AUSTRALIA (New South Wales)	1927	OK	Early to mid maturing	yes	Pilot experiment 2015 (University of Adelaide, Urrbrae, South Australia, Australia)	yes	Field trial 2013 (University of Adelaide, Urrbrae, South Australia, Australia)
DPG_415	EGA 2248	4	T. aestivum variety	AUSTRALIA (Western Australia)	2003	OK	Early to mid maturing	yes	Pilot experiment 2015 (University of Adelaide, Urrbrae, South Australia, Australia)	yes	Field trial 2013 (University of Adelaide, Urrbrae, South Australia, Australia)
DPG_416	EGA BLANCO	1	T. aestivum variety	AUSTRALIA	2004	OK	Early to mid maturing	yes	Pilot experiment 2015 (University of Adelaide, Urrbrae, South Australia, Australia)	yes	Field trial 2013 (University of Adelaide, Urrbrae, South Australia, Australia)
DPG_417	EGA BONNIE ROCK	Admixed	T. aestivum variety	AUSTRALIA (Western Australia)	2002	OK	Early to mid maturing			yes	Field trial 2013 (University of Adelaide, Urrbrae, South Australia, Australia)
DPG_418	EGA CASTLE ROCK	3	T. aestivum variety	AUSTRALIA	2004	OK	Early to mid maturing			yes	Field trial 2013 (University of Adelaide, Urrbrae, South Australia, Australia)
DPG_419	EGA JITARNING	4	T. aestivum variety	AUSTRALIA (Western Australia)	2004	OK	Early to mid maturing	yes	Pilot experiment 2015 (University of Adelaide, Urrbrae, South Australia, Australia)	yes	Field trial 2013 (University of Adelaide, Urrbrae, South Australia, Australia)
DPG_420	EGA EAGLEHAWK	1	T. aestivum variety	AUSTRALIA (Victoria)	2006	OK	Late maturing	yes	Pilot experiment 2015 (University of Adelaide, Urrbrae, South Australia, Australia)
DPG_423	EGYPCIO 208	Admixed	T. aestivum	ARGENTINA	na	OK	Early to mid maturing			yes	Field trial 2013 (University of Adelaide, Urrbrae, South Australia, Australia)
DPG_426	EMU'S	1	T. aestivum variety	MEXICO (CIMMYT)	1979	OK	Early to mid maturing	yes	Pilot experiment 2015 (University of Adelaide, Urrbrae, South Australia, Australia)	yes	Field trial 2013 (University of Adelaide, Urrbrae, South Australia, Australia)	yes	INRA Spring Wheat Collection
DPG_427	ENDURE	4	T. aestivum variety	AUSTRALIA (Victoria)	2008	OK	Late maturing	yes	Pilot experiment 2015 (University of Adelaide, Urrbrae, South Australia, Australia)
DPG_428	ERADU	Admixed	T. aestivum variety	AUSTRALIA (Western Australia)	1982	OK	Early to mid maturing			yes	Field trial 2013 (University of Adelaide, Urrbrae, South Australia, Australia)
DPG_431	ESTANZUELA DORADO	Admixed	T. aestivum	URUGUAY	na	OK	Late maturing	yes	Pilot experiment 2015 (University of Adelaide, Urrbrae, South Australia, Australia)			yes	INRA Spring Wheat Collection
DPG_433	EXCALIBUR	4	T. aestivum variety	AUSTRALIA (South Australia)	1990	OK	Early to mid maturing	yes	Pilot experiment 2015 (University of Adelaide, Urrbrae, South Australia, Australia)	yes	Pilot experiment 2015 (University of Adelaide, Urrbrae, South Australia, Australia)
DPG_434	Falcon	4	T. aestivum variety	AUSTRALIA (New South Wales)	1960	OK	Early to mid maturing	yes	Pilot experiment 2015 (University of Adelaide, Urrbrae, South Australia, Australia)	yes	Field trial 2013 (University of Adelaide, Urrbrae, South Australia, Australia)
DPG_435	FANG	4	T. aestivum variety	AUSTRALIA (South Australia)	2008	OK	Early to mid maturing	yes	Pilot experiment 2015 (University of Adelaide, Urrbrae, South Australia, Australia)	yes	Field trial 2013 (University of Adelaide, Urrbrae, South Australia, Australia)
DPG_436	Fang 60	1	T. aestivum variety	THAILAND	1987	OK	Early to mid maturing	yes	Pilot experiment 2015 (University of Adelaide, Urrbrae, South Australia, Australia)	yes	Field trial 2013 (University of Adelaide, Urrbrae, South Australia, Australia)
DPG_437	Federation	4	T. aestivum variety	AUSTRALIA (New South Wales)	1901	OK	Late maturing	yes	Pilot experiment 2015 (University of Adelaide, Urrbrae, South Australia, Australia)
DPG_438	Festiguay	4	T. aestivum variety	AUSTRALIA (New South Wales)	1963	OK	Early to mid maturing	yes	Pilot experiment 2015 (University of Adelaide, Urrbrae, South Australia, Australia)	yes	Field trial 2013 (University of Adelaide, Urrbrae, South Australia, Australia)
DPG_441	Florence	4	T. aestivum variety	AUSTRALIA (New South Wales)	1906	OK	Early to mid maturing	yes	Pilot experiment 2015 (University of Adelaide, Urrbrae, South Australia, Australia)	yes	Field trial 2013 (University of Adelaide, Urrbrae, South Australia, Australia)
DPG_442	Ford	4	T. aestivum variety	AUSTRALIA (South Australia)	1916	OK	Early to mid maturing	yes	Pilot experiment 2015 (University of Adelaide, Urrbrae, South Australia, Australia)	yes	Field trial 2013 (University of Adelaide, Urrbrae, South Australia, Australia)
DPG_444	FRAME	1	T. aestivum variety	AUSTRALIA (South Australia)	1997	OK	Early to mid maturing	yes	Pilot experiment 2015 (University of Adelaide, Urrbrae, South Australia, Australia)	yes	Field trial 2013 (University of Adelaide, Urrbrae, South Australia, Australia)
DPG_445	Free Gallipoli	4	T. aestivum variety	AUSTRALIA (Victoria)	1926	OK	Late maturing	yes	Pilot experiment 2015 (University of Adelaide, Urrbrae, South Australia, Australia)
DPG_446	FRONTANA 3671	2	T. aestivum	BRAZIL	na	OK	Early to mid maturing	yes	Pilot experiment 2015 (University of Adelaide, Urrbrae, South Australia, Australia)	yes	Pilot experiment 2015 (University of Adelaide, Urrbrae, South Australia, Australia)	yes	INRA Spring Wheat Collection
DPG_449	FUKUHOKOMUGI	2	T. aestivum variety	JAPAN	1979	OK	Early to mid maturing			yes	Field trial 2013 (University of Adelaide, Urrbrae, South Australia, Australia)
DPG_450	G66257	Admixed	T. aestivum	GREECE	na	OK	Early to mid maturing			yes	Field trial 2013 (University of Adelaide, Urrbrae, South Australia, Australia)
DPG_451	G72300	4	T. aestivum	GREECE	na	OK	Early to mid maturing	yes	Pilot experiment 2015 (University of Adelaide, Urrbrae, South Australia, Australia)	yes	Field trial 2013 (University of Adelaide, Urrbrae, South Australia, Australia)	yes	INRA Spring Wheat Collection
DPG_452	Gabo	4	T. aestivum variety	AUSTRALIA (New South Wales)	1942	OK	Early to mid maturing	yes	Pilot experiment 2015 (University of Adelaide, Urrbrae, South Australia, Australia)	yes	Field trial 2013 (University of Adelaide, Urrbrae, South Australia, Australia)
DPG_453	GALA	4	T. aestivum variety	AUSTRALIA (Queensland)	1960	OK	Early to mid maturing	yes	Pilot experiment 2015 (University of Adelaide, Urrbrae, South Australia, Australia)	yes	Field trial 2013 (University of Adelaide, Urrbrae, South Australia, Australia)
DPG_455	GAMENYA	4	T. aestivum variety	AUSTRALIA (New South Wales)	1958	Identical	Early to mid maturing	yes	Pilot experiment 2015 (University of Adelaide, Urrbrae, South Australia, Australia)
DPG_456	GAMMENYA	4	T. aestivum variety	AUSTRALIA (New South Wales)	1958	Identical	Early to mid maturing	yes	Pilot experiment 2015 (University of Adelaide, Urrbrae, South Australia, Australia)
DPG_460	GASCOIGNE	1	T. aestivum variety	AUSTRALIA/SOUTH AFRICA	2008	OK	Early to mid maturing	yes	Pilot experiment 2015 (University of Adelaide, Urrbrae, South Australia, Australia)	yes	Field trial 2013 (University of Adelaide, Urrbrae, South Australia, Australia)
DPG_461	Gatcher	Admixed	T. aestivum variety	AUSTRALIA (New South Wales)	1969	OK	Early to mid maturing	yes	Pilot experiment 2015 (University of Adelaide, Urrbrae, South Australia, Australia)	yes	Pilot experiment 2015 (University of Adelaide, Urrbrae, South Australia, Australia)
DPG_462	GBA HUNTER	1	T. aestivum variety	AUSTRALIA (New South Wales)	2005	Unsure	Early to mid maturing	yes	Pilot experiment 2015 (University of Adelaide, Urrbrae, South Australia, Australia)
DPG_463	GENARO F 81	1	T. aestivum variety	MEXICO (CIMMYT)	1981	OK	Early to mid maturing	yes	Pilot experiment 2015 (University of Adelaide, Urrbrae, South Australia, Australia)	yes	Pilot experiment 2015 (University of Adelaide, Urrbrae, South Australia, Australia)	yes	Australian Grains Genebank
DPG_471	GH'S	1	T. aestivum	MEXICO (CIMMYT)	na	OK	Early to mid maturing	yes	Pilot experiment 2015 (University of Adelaide, Urrbrae, South Australia, Australia)	yes	Field trial 2013 (University of Adelaide, Urrbrae, South Australia, Australia)
DPG_472	Ghurka	4	T. aestivum variety	AUSTRALIA (Victoria)	1924	OK	Late maturing	yes	Pilot experiment 2015 (University of Adelaide, Urrbrae, South Australia, Australia)
DPG_475	GLADIUS	4	T. aestivum variety	AUSTRALIA (South Australia)	2007	OK	Early to mid maturing	yes	Pilot experiment 2015 (University of Adelaide, Urrbrae, South Australia, Australia)	yes	Field trial 2013 (University of Adelaide, Urrbrae, South Australia, Australia)	yes	Australian Grain Technology
DPG_476	Glenwari	4	T. aestivum variety	AUSTRALIA (New South Wales)	1948	OK	Early to mid maturing	yes	Pilot experiment 2015 (University of Adelaide, Urrbrae, South Australia, Australia)	yes	Field trial 2013 (University of Adelaide, Urrbrae, South Australia, Australia)
DPG_477	GLUYAS_EARLY	4	T. aestivum variety	AUSTRALIA	1933	Unsure	Early to mid maturing	yes	Pilot experiment 2015 (University of Adelaide, Urrbrae, South Australia, Australia)
DPG_478	GP260	Admixed	T. aestivum variety	CANADA	1983	OK	Early to mid maturing	yes	Pilot experiment 2015 (University of Adelaide, Urrbrae, South Australia, Australia)	yes	Field trial 2013 (University of Adelaide, Urrbrae, South Australia, Australia)
DPG_479	Granarolo	Admixed	T. aestivum variety	ITALY	1973	OK	Early to mid maturing	yes	Pilot experiment 2015 (University of Adelaide, Urrbrae, South Australia, Australia)	yes	Field trial 2013 (University of Adelaide, Urrbrae, South Australia, Australia)	yes	INRA Spring Wheat Collection
DPG_483	GUARDIAN	3	T. aestivum variety	GREAT BRITAIN	1981	OK	Early to mid maturing			yes	Field trial 2013 (University of Adelaide, Urrbrae, South Australia, Australia)
DPG_486	GUTHA	4	T. aestivum variety	AUSTRALIA (Western Australia)	1982	OK	Early to mid maturing	yes	Pilot experiment 2015 (University of Adelaide, Urrbrae, South Australia, Australia)
DPG_493	H 1357	2	T. aestivum landrace	AFGHANISTAN	na	OK	Early to mid maturing			yes	Field trial 2013 (University of Adelaide, Urrbrae, South Australia, Australia)
DPG_499	H 1440	2	T. aestivum landrace	AFGHANISTAN	na	OK	Late maturing	yes	Pilot experiment 2015 (University of Adelaide, Urrbrae, South Australia, Australia)			yes	In-house collection
DPG_502	H 1496	2	T. aestivum landrace	AFGHANISTAN	na	OK	Early to mid maturing			yes	Field trial 2013 (University of Adelaide, Urrbrae, South Australia, Australia)
DPG_504	H 1511	2	T. aestivum landrace	AFGHANISTAN	na	OK	Early to mid maturing			yes	Field trial 2013 (University of Adelaide, Urrbrae, South Australia, Australia)
DPG_509	H 1534	2	T. aestivum landrace	AFGHANISTAN	na	OK	Late maturing	yes	Pilot experiment 2015 (University of Adelaide, Urrbrae, South Australia, Australia)			yes	In-house collection
DPG_510	H 1537	2	T. aestivum landrace	AFGHANISTAN	na	OK	Early to mid maturing			yes	Field trial 2013 (University of Adelaide, Urrbrae, South Australia, Australia)
DPG_512	H 1542	2	T. aestivum landrace	AFGHANISTAN	na	OK	Early to mid maturing			yes	Field trial 2013 (University of Adelaide, Urrbrae, South Australia, Australia)
DPG_513	H 1546	2	T. aestivum landrace	AFGHANISTAN	na	OK	Early to mid maturing			yes	Field trial 2013 (University of Adelaide, Urrbrae, South Australia, Australia)
DPG_518	H 1601	2	T. aestivum landrace	AFGHANISTAN	na	OK	Early to mid maturing			yes	Field trial 2013 (University of Adelaide, Urrbrae, South Australia, Australia)
DPG_522	H 1632	2	T. aestivum landrace	AFGHANISTAN	na	OK	Early to mid maturing			yes	Field trial 2013 (University of Adelaide, Urrbrae, South Australia, Australia)
DPG_523	H 1644	4	T. aestivum landrace	AFGHANISTAN	na	OK	Early to mid maturing	yes	Pilot experiment 2015 (University of Adelaide, Urrbrae, South Australia, Australia)	yes	Field trial 2013 (University of Adelaide, Urrbrae, South Australia, Australia)
DPG_529	H 1681A	Admixed	T. aestivum landrace	AFGHANISTAN	na	OK	Early to mid maturing			yes	Field trial 2013 (University of Adelaide, Urrbrae, South Australia, Australia)
DPG_530	H 1685	2	T. aestivum landrace	AFGHANISTAN	na	OK	Late maturing	yes	Pilot experiment 2015 (University of Adelaide, Urrbrae, South Australia, Australia)			yes	In-house collection
DPG_534	H 1703	Admixed	T. aestivum landrace	AFGHANISTAN	na	OK	Early to mid maturing	yes	Pilot experiment 2015 (University of Adelaide, Urrbrae, South Australia, Australia)	yes	Field trial 2013 (University of Adelaide, Urrbrae, South Australia, Australia)
DPG_537	H 45	3	T. aestivum variety	AUSTRALIA (New South Wales)	1998	OK	Early to mid maturing			yes	Field trial 2013 (University of Adelaide, Urrbrae, South Australia, Australia)
DPG_538	H 46	3	T. aestivum variety	AUSTRALIA (Western Australia)	2005	OK	Early to mid maturing			yes	Field trial 2013 (University of Adelaide, Urrbrae, South Australia, Australia)
DPG_539	H 742A	Admixed	T. aestivum variety	ISRAEL	1974	OK	Early to mid maturing	yes	Pilot experiment 2015 (University of Adelaide, Urrbrae, South Australia, Australia)	yes	Field trial 2013 (University of Adelaide, Urrbrae, South Australia, Australia)	yes	INRA Spring Wheat Collection
DPG_540	HALBERD	4	T. aestivum variety	AUSTRALIA (South Australia)	1969	OK	Early to mid maturing	yes	Pilot experiment 2015 (University of Adelaide, Urrbrae, South Australia, Australia)	yes	Field trial 2013 (University of Adelaide, Urrbrae, South Australia, Australia)
DPG_541	Harrier	4	T. aestivum variety	AUSTRALIA (New South Wales)	1982	Incorrect	Early to mid maturing	yes	Pilot experiment 2015 (University of Adelaide, Urrbrae, South Australia, Australia)
DPG_542	HARTOG	1	T. aestivum variety	AUSTRALIA (Queensland)	1982	OK	Early to mid maturing	yes	Pilot experiment 2015 (University of Adelaide, Urrbrae, South Australia, Australia)	yes	Pilot experiment 2015 (University of Adelaide, Urrbrae, South Australia, Australia)
DPG_546	Hereward	4	T. aestivum variety	GREAT BRITAIN	1989	OK	Late maturing	yes	Pilot experiment 2015 (University of Adelaide, Urrbrae, South Australia, Australia)
DPG_547	Heron	4	T. aestivum variety	AUSTRALIA (New South Wales)	1958	OK	Early to mid maturing	yes	Pilot experiment 2015 (University of Adelaide, Urrbrae, South Australia, Australia)	yes	Field trial 2013 (University of Adelaide, Urrbrae, South Australia, Australia)
DPG_549	HTWYT-001	1	T. aestivum	MEXICO (CIMMYT)	na	OK	Early to mid maturing	yes	Pilot experiment 2015 (University of Adelaide, Urrbrae, South Australia, Australia)	yes	Field trial 2013 (University of Adelaide, Urrbrae, South Australia, Australia)
DPG_551	HTWYT-003	1	T. aestivum	MEXICO (CIMMYT)	na	OK	Early to mid maturing	yes	Pilot experiment 2015 (University of Adelaide, Urrbrae, South Australia, Australia)	yes	Field trial 2013 (University of Adelaide, Urrbrae, South Australia, Australia)
DPG_552	HTWYT-004	1	T. aestivum	MEXICO (CIMMYT)	na	OK	Early to mid maturing	yes	Pilot experiment 2015 (University of Adelaide, Urrbrae, South Australia, Australia)	yes	Field trial 2013 (University of Adelaide, Urrbrae, South Australia, Australia)
DPG_556	HTWYT-008	1	T. aestivum	MEXICO (CIMMYT)	na	OK	Early to mid maturing	yes	Pilot experiment 2015 (University of Adelaide, Urrbrae, South Australia, Australia)	yes	Pilot experiment 2015 (University of Adelaide, Urrbrae, South Australia, Australia)
DPG_557	HTWYT-009	1	T. aestivum	MEXICO (CIMMYT)	na	OK	Early to mid maturing	yes	Pilot experiment 2015 (University of Adelaide, Urrbrae, South Australia, Australia)	yes	Field trial 2013 (University of Adelaide, Urrbrae, South Australia, Australia)
DPG_559	HTWYT-012	1	T. aestivum	MEXICO (CIMMYT)	na	OK	Early to mid maturing	yes	Pilot experiment 2015 (University of Adelaide, Urrbrae, South Australia, Australia)	yes	Field trial 2013 (University of Adelaide, Urrbrae, South Australia, Australia)
DPG_559	HTWYT-012	1	T. aestivum	MEXICO (CIMMYT)	na	Duplicate	Early to mid maturing	yes	Pilot experiment 2015 (University of Adelaide, Urrbrae, South Australia, Australia)
DPG_560	HTWYT-013	1	T. aestivum	MEXICO (CIMMYT)	na	OK	Early to mid maturing	yes	Pilot experiment 2015 (University of Adelaide, Urrbrae, South Australia, Australia)	yes	Field trial 2013 (University of Adelaide, Urrbrae, South Australia, Australia)
DPG_561	HTWYT-015	1	T. aestivum	MEXICO (CIMMYT)	na	OK	Early to mid maturing	yes	Pilot experiment 2015 (University of Adelaide, Urrbrae, South Australia, Australia)	yes	Field trial 2013 (University of Adelaide, Urrbrae, South Australia, Australia)
DPG_562	HTWYT-028	1	T. aestivum	MEXICO (CIMMYT)	na	OK	Early to mid maturing	yes	Pilot experiment 2015 (University of Adelaide, Urrbrae, South Australia, Australia)	yes	Field trial 2013 (University of Adelaide, Urrbrae, South Australia, Australia)
DPG_563	HTWYT-030	1	T. aestivum	MEXICO (CIMMYT)	na	OK	Early to mid maturing	yes	Pilot experiment 2015 (University of Adelaide, Urrbrae, South Australia, Australia)	yes	Field trial 2013 (University of Adelaide, Urrbrae, South Australia, Australia)
DPG_564	HTWYT-011	1	T. aestivum	MEXICO (CIMMYT)	na	OK	Early to mid maturing	yes	Pilot experiment 2015 (University of Adelaide, Urrbrae, South Australia, Australia)	yes	Field trial 2013 (University of Adelaide, Urrbrae, South Australia, Australia)
DPG_565	HTWYT-014	1	T. aestivum	MEXICO (CIMMYT)	na	OK	Early to mid maturing	yes	Pilot experiment 2015 (University of Adelaide, Urrbrae, South Australia, Australia)	yes	Field trial 2013 (University of Adelaide, Urrbrae, South Australia, Australia)
DPG_566	HTWYT-029	1	T. aestivum	MEXICO (CIMMYT)	na	Identical	Early to mid maturing	yes	Pilot experiment 2015 (University of Adelaide, Urrbrae, South Australia, Australia)
DPG_567	HTWYT-031	1	T. aestivum	MEXICO (CIMMYT)	na	OK	Early to mid maturing	yes	Pilot experiment 2015 (University of Adelaide, Urrbrae, South Australia, Australia)	yes	Field trial 2013 (University of Adelaide, Urrbrae, South Australia, Australia)
DPG_568	HUDSONS EARLY PURPLE STRAW	4	T. aestivum variety	AUSTRALIA (New South Wales)	1890	OK	Late maturing	yes	Pilot experiment 2015 (University of Adelaide, Urrbrae, South Australia, Australia)
DPG_572	INDIA-105	2	T. aestivum landrace	INDIA	na	OK	Early to mid maturing			yes	Field trial 2013 (University of Adelaide, Urrbrae, South Australia, Australia)
DPG_573	INDIA-106	4	T. aestivum landrace	INDIA	na	OK	Late maturing	yes	Pilot experiment 2015 (University of Adelaide, Urrbrae, South Australia, Australia)
DPG_575	INDIA-108	2	T. aestivum landrace	INDIA	na	OK	Early to mid maturing			yes	Field trial 2013 (University of Adelaide, Urrbrae, South Australia, Australia)
DPG_576	INDIA-120	2	T. aestivum landrace	INDIA	na	OK	Early to mid maturing			yes	Field trial 2013 (University of Adelaide, Urrbrae, South Australia, Australia)
DPG_577	INDIA-134	2	T. aestivum landrace	INDIA	na	OK	Early to mid maturing			yes	Field trial 2013 (University of Adelaide, Urrbrae, South Australia, Australia)
DPG_580	INDIA-223	4	T. aestivum landrace	INDIA	na	OK	Late maturing	yes	Pilot experiment 2015 (University of Adelaide, Urrbrae, South Australia, Australia)
DPG_581	INDIA-231	4	T. aestivum landrace	INDIA	na	OK	Late maturing	yes	Pilot experiment 2015 (University of Adelaide, Urrbrae, South Australia, Australia)			yes	In-house collection
DPG_582	INDIA-322	4	T. aestivum landrace	INDIA	na	OK	Late maturing	yes	Pilot experiment 2015 (University of Adelaide, Urrbrae, South Australia, Australia)			yes	In-house collection
DPG_584	INDIA-325	2	T. aestivum landrace	INDIA	na	OK	Early to mid maturing			yes	Field trial 2013 (University of Adelaide, Urrbrae, South Australia, Australia)
DPG_586	INDIAN-6	4	T. aestivum landrace	INDIA	na	OK	Early to mid maturing	yes	Pilot experiment 2015 (University of Adelaide, Urrbrae, South Australia, Australia)	yes	Pilot experiment 2015 (University of Adelaide, Urrbrae, South Australia, Australia)
DPG_587	Indis	1	T. aestivum variety	SOUTH AFRICA	1990	OK	Early to mid maturing	yes	Pilot experiment 2015 (University of Adelaide, Urrbrae, South Australia, Australia)	yes	Field trial 2013 (University of Adelaide, Urrbrae, South Australia, Australia)
DPG_588	INIA 66	1	T. aestivum variety	MEXICO (CIMMYT)	1966	OK	Early to mid maturing	yes	Pilot experiment 2015 (University of Adelaide, Urrbrae, South Australia, Australia)	yes	Field trial 2013 (University of Adelaide, Urrbrae, South Australia, Australia)	yes	Australian Grains Genebank
DPG_589	INIA 19	Admixed	T. aestivum	MEXICO (CIMMYT)	na	OK	Early to mid maturing			yes	Field trial 2013 (University of Adelaide, Urrbrae, South Australia, Australia)
DPG_592	Insignia	na	T. aestivum variety	AUSTRALIA (Victoria)	1946	>5% missing values	Early to mid maturing	yes	Pilot experiment 2015 (University of Adelaide, Urrbrae, South Australia, Australia)
DPG_595	IRAQ 40	2	T. aestivum landrace	IRAQ	na	OK	Early to mid maturing			yes	Field trial 2013 (University of Adelaide, Urrbrae, South Australia, Australia)
DPG_596	IRAQ 42	2	T. aestivum landrace	IRAQ	na	OK	Early to mid maturing			yes	Field trial 2013 (University of Adelaide, Urrbrae, South Australia, Australia)
DPG_597	Iraq 43	2	T. aestivum	IRAQ	na	OK	Early to mid maturing			yes	Field trial 2013 (University of Adelaide, Urrbrae, South Australia, Australia)
DPG_598	IRAQ 47	4	T. aestivum landrace	IRAQ	na	OK	Early to mid maturing	yes	Pilot experiment 2015 (University of Adelaide, Urrbrae, South Australia, Australia)	yes	Field trial 2013 (University of Adelaide, Urrbrae, South Australia, Australia)
DPG_603	Janz	3	T. aestivum variety	AUSTRALIA (Queensland)	1989	OK	Early to mid maturing	yes	Pilot experiment 2015 (University of Adelaide, Urrbrae, South Australia, Australia)	yes	Field trial 2013 (University of Adelaide, Urrbrae, South Australia, Australia)
DPG_607	JUPATECO 73	1	T. aestivum variety	MEXICO (CIMMYT)	1973	OK	Early to mid maturing	yes	Pilot experiment 2015 (University of Adelaide, Urrbrae, South Australia, Australia)	yes	Field trial 2013 (University of Adelaide, Urrbrae, South Australia, Australia)	yes	Australian Grains Genebank
DPG_611	KALYANSONA	1	T. aestivum variety	INDIA	1967	OK	Early to mid maturing	yes	Pilot experiment 2015 (University of Adelaide, Urrbrae, South Australia, Australia)	yes	Field trial 2013 (University of Adelaide, Urrbrae, South Australia, Australia)
DPG_617	KENNEDY	1	T. aestivum variety	AUSTRALIA (Queensland)	1998	OK	Early to mid maturing	yes	Pilot experiment 2015 (University of Adelaide, Urrbrae, South Australia, Australia)	yes	Field trial 2013 (University of Adelaide, Urrbrae, South Australia, Australia)
DPG_619	Kewell	4	T. aestivum variety	AUSTRALIA (Victoria)	1977	OK	Early to mid maturing	yes	Pilot experiment 2015 (University of Adelaide, Urrbrae, South Australia, Australia)	yes	Field trial 2013 (University of Adelaide, Urrbrae, South Australia, Australia)
DPG_622	KING ROCK	Admixed	T. aestivum variety	AUSTRALIA (Western Australia)	2009	OK	Early to mid maturing			yes	Field trial 2013 (University of Adelaide, Urrbrae, South Australia, Australia)
DPG_623	KINGS WHITE	4	T. aestivum variety	AUSTRALIA (South Australia)	na	Unsure	Early to mid maturing	yes	Pilot experiment 2015 (University of Adelaide, Urrbrae, South Australia, Australia)
DPG_625	KITE	4	T. aestivum variety	AUSTRALIA (New South Wales)	1973	OK	Early to mid maturing	yes	Pilot experiment 2015 (University of Adelaide, Urrbrae, South Australia, Australia)	yes	Field trial 2013 (University of Adelaide, Urrbrae, South Australia, Australia)
DPG_626	Koda	4	T. aestivum variety	AUSTRALIA (New South Wales)	1955	OK	Early to mid maturing	yes	Pilot experiment 2015 (University of Adelaide, Urrbrae, South Australia, Australia)	yes	Field trial 2013 (University of Adelaide, Urrbrae, South Australia, Australia)
DPG_631	KRICHAUFF	4	T. aestivum variety	AUSTRALIA (South Australia)	1998	OK	Early to mid maturing	yes	Pilot experiment 2015 (University of Adelaide, Urrbrae, South Australia, Australia)	yes	Field trial 2013 (University of Adelaide, Urrbrae, South Australia, Australia)
DPG_633	KUKRI	1	T. aestivum variety	AUSTRALIA (South Australia)	1999	OK	Early to mid maturing	yes	Pilot experiment 2015 (University of Adelaide, Urrbrae, South Australia, Australia)	yes	Field trial 2013 (University of Adelaide, Urrbrae, South Australia, Australia)
DPG_634	Kuldzhinskaya	2	T. aestivum variety	CHINA	1959	OK	Early to mid maturing			yes	Field trial 2013 (University of Adelaide, Urrbrae, South Australia, Australia)
DPG_635	KULIN	Admixed	T. aestivum variety	AUSTRALIA (Western Australia)	1986	OK	Early to mid maturing			yes	Field trial 2013 (University of Adelaide, Urrbrae, South Australia, Australia)
DPG_636	KUNJIN	4	T. aestivum variety	AUSTRALIA	na	OK	Early to mid maturing	yes	Pilot experiment 2015 (University of Adelaide, Urrbrae, South Australia, Australia)	yes	Field trial 2013 (University of Adelaide, Urrbrae, South Australia, Australia)
DPG_640	LANG	3	T. aestivum variety	AUSTRALIA (Queensland)	2000	OK	Early to mid maturing			yes	Field trial 2013 (University of Adelaide, Urrbrae, South Australia, Australia)
DPG_642	LARK	3	T. aestivum variety	AUSTRALIA (New South Wales)	1990	OK	Early to mid maturing			yes	Field trial 2013 (University of Adelaide, Urrbrae, South Australia, Australia)
DPG_647	LINCOLN	4	T. aestivum variety	UNITED STATES	na	OK	Late maturing	yes	Pilot experiment 2015 (University of Adelaide, Urrbrae, South Australia, Australia)
DPG_652	LW 333	2	T. aestivum	ARMENIA	na	Unsure	Late maturing	yes	Pilot experiment 2015 (University of Adelaide, Urrbrae, South Australia, Australia)			yes	INRA Spring Wheat Collection
DPG_653	LW 334	2	T. aestivum	TURKEY	na	OK	Late maturing	yes	Pilot experiment 2015 (University of Adelaide, Urrbrae, South Australia, Australia)			yes	INRA Spring Wheat Collection
DPG_654	LW 335	2	T. aestivum	TURKEY	na	OK	Late maturing	yes	Pilot experiment 2015 (University of Adelaide, Urrbrae, South Australia, Australia)			yes	INRA Spring Wheat Collection
DPG_655	LW 336	4	T. aestivum	MOROCCO	na	OK	Late maturing	yes	Pilot experiment 2015 (University of Adelaide, Urrbrae, South Australia, Australia)			yes	INRA Spring Wheat Collection
DPG_656	LW 337	3	T. aestivum	ETHIOPIA	na	Unsure	Late maturing	yes	Pilot experiment 2015 (University of Adelaide, Urrbrae, South Australia, Australia)			yes	INRA Spring Wheat Collection
DPG_658	LW 342	2	T. aestivum	CHINA	na	OK	Early to mid maturing			yes	Field trial 2013 (University of Adelaide, Urrbrae, South Australia, Australia)
DPG_660	LW 349	2	T. aestivum	TAJIKISTAN	na	OK	Late maturing	yes	Pilot experiment 2015 (University of Adelaide, Urrbrae, South Australia, Australia)			yes	INRA Spring Wheat Collection
DPG_663	LW 353	1	T. aestivum	RUSSIA	na	OK	Late maturing	yes	Pilot experiment 2015 (University of Adelaide, Urrbrae, South Australia, Australia)
DPG_665	LW 369	2	T. aestivum	TURKMENISTAN	na	Unsure	Late maturing	yes	Pilot experiment 2015 (University of Adelaide, Urrbrae, South Australia, Australia)			yes	INRA Spring Wheat Collection
DPG_666	LYALLPUR-73	1	T. aestivum variety	PAKISTAN	1973	OK	Early to mid maturing	yes	Pilot experiment 2015 (University of Adelaide, Urrbrae, South Australia, Australia)	yes	Field trial 2013 (University of Adelaide, Urrbrae, South Australia, Australia)
DPG_668	M708//G25/N163	na	T. aestivum	ISRAEL	na	>5% missing values	Early to mid maturing	yes	Pilot experiment 2015 (University of Adelaide, Urrbrae, South Australia, Australia)			yes	INRA Spring Wheat Collection
DPG_669	MACE	Admixed	T. aestivum variety	AUSTRALIA (South Australia)	2008	OK	Early to mid maturing			yes	Field trial 2013 (University of Adelaide, Urrbrae, South Australia, Australia)
DPG_672	Madden	4	T. aestivum variety	AUSTRALIA (Western Australia)	1973	OK	Early to mid maturing	yes	Pilot experiment 2015 (University of Adelaide, Urrbrae, South Australia, Australia)	yes	Field trial 2013 (University of Adelaide, Urrbrae, South Australia, Australia)
DPG_673	MAGENTA	Admixed	T. aestivum variety	AUSTRALIA (Western Australia)	2007	OK	Early to mid maturing			yes	Field trial 2013 (University of Adelaide, Urrbrae, South Australia, Australia)
DPG_674	MARINGA-RHT1	Admixed	T. aestivum variety	na	na	OK	Early to mid maturing			yes	Field trial 2013 (University of Adelaide, Urrbrae, South Australia, Australia)
DPG_676	MARS DE SUEDE ROUGE BARBU	4	T. aestivum variety	FRANCE	na	OK	Late maturing	yes	Pilot experiment 2015 (University of Adelaide, Urrbrae, South Australia, Australia)
DPG_678	Matong	4	T. aestivum variety	AUSTRALIA (Victoria)	1982	OK	Early to mid maturing	yes	Pilot experiment 2015 (University of Adelaide, Urrbrae, South Australia, Australia)	yes	Field trial 2013 (University of Adelaide, Urrbrae, South Australia, Australia)
DPG_701	MEIRA	4	T. aestivum variety	SPAIN	2006	OK	Late maturing	yes	Pilot experiment 2015 (University of Adelaide, Urrbrae, South Australia, Australia)			yes	INRA Spring Wheat Collection
DPG_702	MELCHIOR	4	T. aestivum variety	NETHERLANDS	1974	OK	Late maturing	yes	Pilot experiment 2015 (University of Adelaide, Urrbrae, South Australia, Australia)
DPG_703	MENDOS	4	T. aestivum variety	AUSTRALIA (New South Wales)	1964	OK	Early to mid maturing	yes	Pilot experiment 2015 (University of Adelaide, Urrbrae, South Australia, Australia)	yes	Field trial 2013 (University of Adelaide, Urrbrae, South Australia, Australia)
DPG_704	Menflo	Admixed	T. aestivum variety	CHILE	1955	OK	Late maturing	yes	Pilot experiment 2015 (University of Adelaide, Urrbrae, South Australia, Australia)			yes	INRA Spring Wheat Collection
DPG_705	Mentana	Admixed	T. aestivum variety	ITALY	1913	OK	Early to mid maturing			yes	Field trial 2013 (University of Adelaide, Urrbrae, South Australia, Australia)
DPG_707	MERINDA	Admixed	T. aestivum variety	AUSTRALIA (New South Wales)	2008	OK	Early to mid maturing			yes	Field trial 2013 (University of Adelaide, Urrbrae, South Australia, Australia)
DPG_710	MEXICO 120	Admixed	T. aestivum variety	MEXICO	1970	OK	Early to mid maturing			yes	Field trial 2013 (University of Adelaide, Urrbrae, South Australia, Australia)
DPG_711	Mexique 58	Admixed	T. aestivum	MEXICO (CIMMYT)	na	OK	Early to mid maturing			yes	Field trial 2013 (University of Adelaide, Urrbrae, South Australia, Australia)
DPG_712	Mexique 9	Admixed	T. aestivum	MEXICO (CIMMYT)	na	OK	Early to mid maturing			yes	Field trial 2013 (University of Adelaide, Urrbrae, South Australia, Australia)
DPG_717	MOCHO DE ESPIGA BRANCA	4	T. aestivum variety	PORTUGAL	1928	OK	Late maturing	yes	Pilot experiment 2015 (University of Adelaide, Urrbrae, South Australia, Australia)			yes	INRA Spring Wheat Collection
DPG_719	MOLINEUX	4	T. aestivum variety	AUSTRALIA (South Australia)	1988	OK	Early to mid maturing	yes	Pilot experiment 2015 (University of Adelaide, Urrbrae, South Australia, Australia)	yes	Field trial 2013 (University of Adelaide, Urrbrae, South Australia, Australia)
DPG_725	N46	na	T. aestivum variety	ISRAEL	1967	>5% missing values	Early to mid maturing	yes	Pilot experiment 2015 (University of Adelaide, Urrbrae, South Australia, Australia)			yes	INRA Spring Wheat Collection
DPG_726	N67M2	Admixed	T. aestivum	ISRAEL	na	OK	Early to mid maturing	yes	Pilot experiment 2015 (University of Adelaide, Urrbrae, South Australia, Australia)	yes	Field trial 2013 (University of Adelaide, Urrbrae, South Australia, Australia)	yes	INRA Spring Wheat Collection
DPG_727	Nabawa	4	T. aestivum variety	AUSTRALIA (New South Wales)	1915	OK	Early to mid maturing	yes	Pilot experiment 2015 (University of Adelaide, Urrbrae, South Australia, Australia)	yes	Pilot experiment 2015 (University of Adelaide, Urrbrae, South Australia, Australia)
DPG_728	NACHIPUNDO	2	T. aestivum variety	NEPAL	na	OK	Early to mid maturing			yes	Field trial 2013 (University of Adelaide, Urrbrae, South Australia, Australia)
DPG_729	NANKING NO25	2	T. aestivum variety	CHINA	1937	OK	Early to mid maturing			yes	Field trial 2013 (University of Adelaide, Urrbrae, South Australia, Australia)
DPG_736	Norin 10	2	T. aestivum variety	JAPAN	na	OK	Early to mid maturing			yes	Field trial 2013 (University of Adelaide, Urrbrae, South Australia, Australia)
DPG_738	NORIN 60	2	T. aestivum variety	JAPAN	1944	OK	Early to mid maturing			yes	Field trial 2013 (University of Adelaide, Urrbrae, South Australia, Australia)
DPG_739	NORIN 64	2	T. aestivum variety	JAPAN	1944	OK	Early to mid maturing			yes	Field trial 2013 (University of Adelaide, Urrbrae, South Australia, Australia)
DPG_740	NORIN 10/BREVOR	4	T. aestivum variety	UNITED STATES	na	Incorrect	Early to mid maturing	yes	Pilot experiment 2015 (University of Adelaide, Urrbrae, South Australia, Australia)
DPG_741	NP120	4	T. aestivum variety	INDIA	1925	OK	Early to mid maturing	yes	Pilot experiment 2015 (University of Adelaide, Urrbrae, South Australia, Australia)	yes	Field trial 2013 (University of Adelaide, Urrbrae, South Australia, Australia)
DPG_743	ODESSA EXP STA 17413	Admixed	T. aestivum variety	SYRIA	na	OK	Late maturing	yes	Pilot experiment 2015 (University of Adelaide, Urrbrae, South Australia, Australia)			yes	INRA Spring Wheat Collection
DPG_744	ODESSA EXP STA 19565	4	T. aestivum variety	ETHIOPIA	na	OK	Early to mid maturing	yes	Pilot experiment 2015 (University of Adelaide, Urrbrae, South Australia, Australia)	yes	Field trial 2013 (University of Adelaide, Urrbrae, South Australia, Australia)	yes	INRA Spring Wheat Collection
DPG_745	ODESSA EXP STA 21821	na	T. aestivum variety	PORTUGAL	na	>5% missing values	Late maturing	yes	Pilot experiment 2015 (University of Adelaide, Urrbrae, South Australia, Australia)
DPG_752	OPATA 85	1	T. aestivum variety	MEXICO (CIMMYT)	1985	OK	Early to mid maturing	yes	Pilot experiment 2015 (University of Adelaide, Urrbrae, South Australia, Australia)	yes	Field trial 2013 (University of Adelaide, Urrbrae, South Australia, Australia)	yes	Australian Grains Genebank
DPG_758	Palestinskaya	4	T. aestivum variety	PALESTINE	1926	OK	Early to mid maturing	yes	Pilot experiment 2015 (University of Adelaide, Urrbrae, South Australia, Australia)	yes	Field trial 2013 (University of Adelaide, Urrbrae, South Australia, Australia)	yes	INRA Spring Wheat Collection
DPG_760	PAMUKALE	Admixed	T. aestivum variety	TURKEY	na	OK	Early to mid maturing	yes	Pilot experiment 2015 (University of Adelaide, Urrbrae, South Australia, Australia)	yes	Field trial 2013 (University of Adelaide, Urrbrae, South Australia, Australia)	yes	INRA Spring Wheat Collection
DPG_761	PASTOR	1	T. aestivum variety	MEXICO (CIMMYT)	1993	OK	Early to mid maturing	yes	Pilot experiment 2015 (University of Adelaide, Urrbrae, South Australia, Australia)	yes	Field trial 2013 (University of Adelaide, Urrbrae, South Australia, Australia)
DPG_765	PBW 343	1	T. aestivum variety	INDIA	1995	OK	Early to mid maturing	yes	Pilot experiment 2015 (University of Adelaide, Urrbrae, South Australia, Australia)	yes	Field trial 2013 (University of Adelaide, Urrbrae, South Australia, Australia)	yes	Australian Grains Genebank
DPG_766	PEAKE	3	T. aestivum variety	AUSTRALIA (Victoria)	2007	OK	Early to mid maturing			yes	Field trial 2013 (University of Adelaide, Urrbrae, South Australia, Australia)
DPG_768	PELSART	3	T. aestivum variety	AUSTRALIA (Queensland)	1994	OK	Early to mid maturing			yes	Field trial 2013 (University of Adelaide, Urrbrae, South Australia, Australia)
DPG_771	PERSIA 11	2	T. aestivum landrace	IRAN	na	OK	Early to mid maturing			yes	Field trial 2013 (University of Adelaide, Urrbrae, South Australia, Australia)
DPG_775	PERSIA 21	4	T. aestivum landrace	IRAN	na	OK	Late maturing	yes	Pilot experiment 2015 (University of Adelaide, Urrbrae, South Australia, Australia)			yes	In-house collection
DPG_778	PERSIA 4	2	T. aestivum landrace	IRAN	na	OK	Late maturing	yes	Pilot experiment 2015 (University of Adelaide, Urrbrae, South Australia, Australia)			yes	In-house collection
DPG_779	PERSIA 7	2	T. aestivum landrace	IRAN	na	OK	Late maturing	yes	Pilot experiment 2015 (University of Adelaide, Urrbrae, South Australia, Australia)			yes	In-house collection
DPG_799	PI626580-4	4	T. aestivum	IRAN	na	Unsure	Early to mid maturing	yes	Pilot experiment 2015 (University of Adelaide, Urrbrae, South Australia, Australia)
DPG_802	Pinnacle	4	T. aestivum variety	AUSTRALIA (Victoria)	1946	OK	Late maturing	yes	Pilot experiment 2015 (University of Adelaide, Urrbrae, South Australia, Australia)
DPG_803	Pitic 62	Admixed	na	MEXICO (CIMMYT)	na	OK	Early to mid maturing	yes	Pilot experiment 2015 (University of Adelaide, Urrbrae, South Australia, Australia)	yes	Pilot experiment 2015 (University of Adelaide, Urrbrae, South Australia, Australia)	yes	Australian Grains Genebank
DPG_805	Potam 70	4	T. aestivum variety	MEXICO (CIMMYT)	1970	OK	Early to mid maturing	yes	Pilot experiment 2015 (University of Adelaide, Urrbrae, South Australia, Australia)	yes	Field trial 2013 (University of Adelaide, Urrbrae, South Australia, Australia)
DPG_807	PRECOCE DU JAPON	Admixed	T. aestivum variety	FRANCE	1868	OK	Early to mid maturing			yes	Field trial 2013 (University of Adelaide, Urrbrae, South Australia, Australia)
DPG_808	PRESTON	Admixed	T. aestivum variety	AUSTRALIA	1888	OK	Early to mid maturing			yes	Field trial 2013 (University of Adelaide, Urrbrae, South Australia, Australia)
DPG_812	PROMESSA	4	T. aestivum variety	NETHERLANDS	1991	OK	Late maturing	yes	Pilot experiment 2015 (University of Adelaide, Urrbrae, South Australia, Australia)
DPG_813	PROVINS	4	T. aestivum variety	FRANCE	1949	OK	Late maturing	yes	Pilot experiment 2015 (University of Adelaide, Urrbrae, South Australia, Australia)
DPG_814	PUNJAB 5	2	T. aestivum	INDIA	na	OK	Early to mid maturing			yes	Field trial 2013 (University of Adelaide, Urrbrae, South Australia, Australia)
DPG_816	PUNJAB 24	2	T. aestivum	INDIA	na	OK	Early to mid maturing			yes	Field trial 2013 (University of Adelaide, Urrbrae, South Australia, Australia)
DPG_817	PURPLE STRAW 885	4	T. aestivum variety	UNITED STATES	na	OK	Late maturing	yes	Pilot experiment 2015 (University of Adelaide, Urrbrae, South Australia, Australia)
DPG_818	QAL 2000	4	T. aestivum variety	AUSTRALIA (New South Wales)	1999	OK	Early to mid maturing	yes	Pilot experiment 2015 (University of Adelaide, Urrbrae, South Australia, Australia)	yes	Field trial 2013 (University of Adelaide, Urrbrae, South Australia, Australia)
DPG_819	QT 7475	3	T. aestivum	AUSTRALIA	na	OK	Early to mid maturing			yes	Field trial 2013 (University of Adelaide, Urrbrae, South Australia, Australia)
DPG_821	Quadrat	4	T. aestivum variety	AUSTRALIA (Victoria)	1941	OK	Late maturing	yes	Pilot experiment 2015 (University of Adelaide, Urrbrae, South Australia, Australia)
DPG_825	RAC655	4	T. aestivum breeding line	AUSTRALIA (South Australia)	na	OK	Early to mid maturing	yes	Pilot experiment 2015 (University of Adelaide, Urrbrae, South Australia, Australia)	yes	Field trial 2013 (University of Adelaide, Urrbrae, South Australia, Australia)
DPG_826	RAC875	1	T. aestivum breeding line	AUSTRALIA (South Australia)	na	Incorrect	Early to mid maturing	yes	Pilot experiment 2015 (University of Adelaide, Urrbrae, South Australia, Australia)
DPG_828	Ranee	4	T. aestivum variety	AUSTRALIA (Victoria)	1924	OK	Early to mid maturing	yes	Pilot experiment 2015 (University of Adelaide, Urrbrae, South Australia, Australia)	yes	Field trial 2013 (University of Adelaide, Urrbrae, South Australia, Australia)
DPG_830	Raven	4	T. aestivum variety	AUSTRALIA (New South Wales)	1963	OK	Early to mid maturing	yes	Pilot experiment 2015 (University of Adelaide, Urrbrae, South Australia, Australia)	yes	Field trial 2013 (University of Adelaide, Urrbrae, South Australia, Australia)
DPG_832	Reeves	Admixed	T. aestivum variety	AUSTRALIA (Western Australia)	1989	OK	Early to mid maturing	yes	Pilot experiment 2015 (University of Adelaide, Urrbrae, South Australia, Australia)	yes	Field trial 2013 (University of Adelaide, Urrbrae, South Australia, Australia)
DPG_833	Roblin	Admixed	T. aestivum variety	CANADA	1986	OK	Early to mid maturing			yes	Field trial 2013 (University of Adelaide, Urrbrae, South Australia, Australia)
DPG_834	ROELFS F2007	1	T. aestivum variety	MEXICO (CIMMYT)	2007	OK	Early to mid maturing	yes	Pilot experiment 2015 (University of Adelaide, Urrbrae, South Australia, Australia)	yes	Field trial 2013 (University of Adelaide, Urrbrae, South Australia, Australia)	yes	Australian Grains Genebank
DPG_837	Rowan	1	T. aestivum variety	AUSTRALIA (Queensland)	1993	OK	Early to mid maturing	yes	Pilot experiment 2015 (University of Adelaide, Urrbrae, South Australia, Australia)	yes	Field trial 2013 (University of Adelaide, Urrbrae, South Australia, Australia)
DPG_840	S975-A4-A1	na	T. aestivum variety	ZIMBABWE	1963	>5% missing values	Early to mid maturing	yes	Pilot experiment 2015 (University of Adelaide, Urrbrae, South Australia, Australia)			yes	INRA Spring Wheat Collection
DPG_849	LONGREACH SCOUT	Admixed	T. aestivum variety	AUSTRALIA (Western Australia)	2009	OK	Early to mid maturing	yes	Pilot experiment 2015 (University of Adelaide, Urrbrae, South Australia, Australia)	yes	Field trial 2013 (University of Adelaide, Urrbrae, South Australia, Australia)	yes	Longreach
DPG_853	LONGREACH SENTINEL	na	T. aestivum variety	AUSTRALIA (Victoria)	2005	>5% missing values	Early to mid maturing	yes	Pilot experiment 2015 (University of Adelaide, Urrbrae, South Australia, Australia)
DPG_854	SERI M82	1	T. aestivum variety	MEXICO (CIMMYT)	1982	OK	Early to mid maturing	yes	Pilot experiment 2015 (University of Adelaide, Urrbrae, South Australia, Australia)	yes	Pilot experiment 2015 (University of Adelaide, Urrbrae, South Australia, Australia)
DPG_858	SIETE CERROS	1	T. aestivum variety	MEXICO (CIMMYT)	na	OK	Early to mid maturing	yes	Pilot experiment 2015 (University of Adelaide, Urrbrae, South Australia, Australia)	yes	Pilot experiment 2015 (University of Adelaide, Urrbrae, South Australia, Australia)	yes	Australian Grains Genebank
DPG_859	Silverstar	3	T. aestivum variety	AUSTRALIA (Victoria)	1996	OK	Early to mid maturing			yes	Field trial 2013 (University of Adelaide, Urrbrae, South Australia, Australia)
DPG_861	SIRAZAIAIBARIGI 2	2	T. aestivum	JAPAN	na	OK	Early to mid maturing			yes	Field trial 2013 (University of Adelaide, Urrbrae, South Australia, Australia)
DPG_863	SOKOLL	1	T. aestivum variety	MEXICO (CIMMYT)	2002	OK	Early to mid maturing	yes	Pilot experiment 2015 (University of Adelaide, Urrbrae, South Australia, Australia)	yes	Field trial 2013 (University of Adelaide, Urrbrae, South Australia, Australia)	yes	In-house collection
DPG_864	Songlen	Admixed	T. aestivum variety	AUSTRALIA (New South Wales)	1975	OK	Early to mid maturing			yes	Field trial 2013 (University of Adelaide, Urrbrae, South Australia, Australia)
DPG_865	Sonora 64	2	T. aestivum variety	MEXICO (CIMMYT)	1964	OK	Early to mid maturing			yes	Field trial 2013 (University of Adelaide, Urrbrae, South Australia, Australia)
DPG_867	SPEAR	4	T. aestivum variety	AUSTRALIA (South Australia)	1983	OK	Early to mid maturing	yes	Pilot experiment 2015 (University of Adelaide, Urrbrae, South Australia, Australia)	yes	Field trial 2013 (University of Adelaide, Urrbrae, South Australia, Australia)
DPG_870	Sujata	2	T. aestivum variety	INDIA	1965	OK	Early to mid maturing			yes	Field trial 2013 (University of Adelaide, Urrbrae, South Australia, Australia)
DPG_871	SUN 325B	3	T. aestivum	AUSTRALIA	na	OK	Early to mid maturing			yes	Field trial 2013 (University of Adelaide, Urrbrae, South Australia, Australia)
DPG_873	SUNBROOK	1	na	AUSTRALIA (New South Wales)	na	OK	Late maturing	yes	Pilot experiment 2015 (University of Adelaide, Urrbrae, South Australia, Australia)
DPG_874	SUNCO	3	T. aestivum variety	AUSTRALIA (New South Wales)	1986	OK	Early to mid maturing			yes	Field trial 2013 (University of Adelaide, Urrbrae, South Australia, Australia)
DPG_878	Sunstar	3	T. aestivum variety	AUSTRALIA (New South Wales)	1983	OK	Early to mid maturing	yes	Pilot experiment 2015 (University of Adelaide, Urrbrae, South Australia, Australia)	yes	Field trial 2013 (University of Adelaide, Urrbrae, South Australia, Australia)
DPG_879	SUNSTATE	1	T. aestivum variety	AUSTRALIA (New South Wales)	1993	OK	Early to mid maturing	yes	Pilot experiment 2015 (University of Adelaide, Urrbrae, South Australia, Australia)	yes	Field trial 2013 (University of Adelaide, Urrbrae, South Australia, Australia)
DPG_886	SYNTHETIC W7984	Admixed	T. aestivum	MEXICO (CIMMYT)	na	OK	Late maturing	yes	Pilot experiment 2015 (University of Adelaide, Urrbrae, South Australia, Australia)			yes	In-house collection
DPG_890	Tacupeto 2001	1	T. aestivum variety	MEXICO (CIMMYT)	2002	OK	Early to mid maturing	yes	Pilot experiment 2015 (University of Adelaide, Urrbrae, South Australia, Australia)	yes	Field trial 2013 (University of Adelaide, Urrbrae, South Australia, Australia)	yes	CIMMYT non-designated MTA
DPG_891	Taferstat	Admixed	T. aestivum variety	ALGERIA	na	OK	Early to mid maturing	yes	Pilot experiment 2015 (University of Adelaide, Urrbrae, South Australia, Australia)	yes	Field trial 2013 (University of Adelaide, Urrbrae, South Australia, Australia)	yes	INRA Spring Wheat Collection
DPG_895	Tamaroi	na	Durum wheat	AUSTRALIA (New South Wales)	na	Not genotyped	Early to mid maturing	yes	Pilot experiment 2015 (University of Adelaide, Urrbrae, South Australia, Australia)
DPG_896	TAMMARIN ROCK	Admixed	T. aestivum variety	AUSTRALIA (Western Australia)	2005	OK	Early to mid maturing			yes	Field trial 2013 (University of Adelaide, Urrbrae, South Australia, Australia)
DPG_900	Tatiara	na	T. aestivum variety	AUSTRALIA (South Australia)	1988	>5% missing values	Early to mid maturing	yes	Pilot experiment 2015 (University of Adelaide, Urrbrae, South Australia, Australia)
DPG_902	TENNANT	4	T. aestivum variety	AUSTRALIA	1998	OK	Late maturing	yes	Pilot experiment 2015 (University of Adelaide, Urrbrae, South Australia, Australia)
DPG_903	TEPOCA 89	na	T. aestivum variety	MEXICO (CIMMYT)	1989	>5% missing values	Late maturing	yes	Pilot experiment 2015 (University of Adelaide, Urrbrae, South Australia, Australia)
DPG_904	THORI 212-VAR 8/1	2	T. aestivum variety	PAKISTAN	1934	OK	Early to mid maturing	yes	Pilot experiment 2015 (University of Adelaide, Urrbrae, South Australia, Australia)	yes	Field trial 2013 (University of Adelaide, Urrbrae, South Australia, Australia)	yes	INRA Spring Wheat Collection
DPG_905	TINCURRIN	4	T. aestivum variety	AUSTRALIA (Western Australia)	1978	OK	Early to mid maturing	yes	Pilot experiment 2015 (University of Adelaide, Urrbrae, South Australia, Australia)	yes	Field trial 2013 (University of Adelaide, Urrbrae, South Australia, Australia)
DPG_907	TRAMI PUY DE DOME	4	T. aestivum variety	FRANCE	na	OK	Late maturing	yes	Pilot experiment 2015 (University of Adelaide, Urrbrae, South Australia, Australia)
DPG_908	TRIDENT	4	T. aestivum variety	AUSTRALIA (South Australia)	1993	OK	Early to mid maturing	yes	Pilot experiment 2015 (University of Adelaide, Urrbrae, South Australia, Australia)	yes	Field trial 2013 (University of Adelaide, Urrbrae, South Australia, Australia)
DPG_912	ULLA	4	T. aestivum variety	FINLAND	1975	OK	Late maturing	yes	Pilot experiment 2015 (University of Adelaide, Urrbrae, South Australia, Australia)
DPG_913	U-Man-Syao-Mai	na	T. aestivum variety	CHINA	1958	>5% missing values	Late maturing	yes	Pilot experiment 2015 (University of Adelaide, Urrbrae, South Australia, Australia)			yes	INRA Spring Wheat Collection
DPG_919	Vasco	3	T. aestivum variety	AUSTRALIA (Queensland)	1985	OK	Early to mid maturing			yes	Field trial 2013 (University of Adelaide, Urrbrae, South Australia, Australia)
DPG_920	VENTURA	1	T. aestivum variety	AUSTRALIA (Victoria)	2004	OK	Early to mid maturing	yes	Pilot experiment 2015 (University of Adelaide, Urrbrae, South Australia, Australia)	yes	Field trial 2013 (University of Adelaide, Urrbrae, South Australia, Australia)
DPG_927	VOROBEY	1	T. aestivum variety	MEXICO (CIMMYT)	2002	OK	Early to mid maturing	yes	Pilot experiment 2015 (University of Adelaide, Urrbrae, South Australia, Australia)	yes	Field trial 2013 (University of Adelaide, Urrbrae, South Australia, Australia)	yes	In-house collection
DPG_928	VULCAN	3	T. aestivum variety	AUSTRALIA (New South Wales)	1985	OK	Early to mid maturing			yes	Field trial 2013 (University of Adelaide, Urrbrae, South Australia, Australia)
DPG_929	W 100	Admixed	T. aestivum landrace	PAKISTAN	na	OK	Early to mid maturing			yes	Field trial 2013 (University of Adelaide, Urrbrae, South Australia, Australia)
DPG_930	W 195	2	T. aestivum landrace	INDIA	na	OK	Early to mid maturing			yes	Field trial 2013 (University of Adelaide, Urrbrae, South Australia, Australia)
DPG_933	W 3589	4	T. aestivum variety	AUSTRALIA (New South Wales)	1965	OK	Late maturing	yes	Pilot experiment 2015 (University of Adelaide, Urrbrae, South Australia, Australia)
DPG_938	W 93	2	T. aestivum landrace	PAKISTAN	na	OK	Early to mid maturing			yes	Field trial 2013 (University of Adelaide, Urrbrae, South Australia, Australia)
DPG_940	WAAGAN	3	T. aestivum variety	AUSTRALIA (Victoria)	2009	OK	Early to mid maturing	yes	Pilot experiment 2015 (University of Adelaide, Urrbrae, South Australia, Australia)	yes	Field trial 2013 (University of Adelaide, Urrbrae, South Australia, Australia)
DPG_941	Waratah	4	T. aestivum variety	AUSTRALIA (New South Wales)	1921	OK	Early to mid maturing	yes	Pilot experiment 2015 (University of Adelaide, Urrbrae, South Australia, Australia)	yes	Field trial 2013 (University of Adelaide, Urrbrae, South Australia, Australia)
DPG_942	WARDS PROLIFIC	4	T. aestivum variety	AUSTRALIA (Victoria)	1890	OK	Early to mid maturing	yes	Pilot experiment 2015 (University of Adelaide, Urrbrae, South Australia, Australia)	yes	Field trial 2013 (University of Adelaide, Urrbrae, South Australia, Australia)
DPG_943	Warigal	4	T. aestivum variety	AUSTRALIA (South Australia)	1978	OK	Early to mid maturing	yes	Pilot experiment 2015 (University of Adelaide, Urrbrae, South Australia, Australia)	yes	Field trial 2013 (University of Adelaide, Urrbrae, South Australia, Australia)
DPG_944	WAWHT 2750	Admixed	T. aestivum breeding line	AUSTRALIA (Western Australia)	na	OK	Early to mid maturing			yes	Field trial 2013 (University of Adelaide, Urrbrae, South Australia, Australia)
DPG_947	WESTONIA	1	T. aestivum variety	AUSTRALIA (Western Australia)	1997	OK	Early to mid maturing	yes	Pilot experiment 2015 (University of Adelaide, Urrbrae, South Australia, Australia)	yes	Field trial 2013 (University of Adelaide, Urrbrae, South Australia, Australia)
DPG_949	WILGOYNE	3	T. aestivum variety	AUSTRALIA (Western Australia)	1988	OK	Early to mid maturing			yes	Field trial 2013 (University of Adelaide, Urrbrae, South Australia, Australia)
DPG_956	WW 1842	Admixed	T. aestivum breeding line	AUSTRALIA (New South Wales)	na	OK	Early to mid maturing			yes	Field trial 2013 (University of Adelaide, Urrbrae, South Australia, Australia)
DPG_958	WW 80	Admixed	T. aestivum breeding line	AUSTRALIA (New South Wales)	na	OK	Early to mid maturing			yes	Field trial 2013 (University of Adelaide, Urrbrae, South Australia, Australia)
DPG_959	WYALKATCHEM	Admixed	T. aestivum variety	AUSTRALIA (Western Australia)	2001	OK	Early to mid maturing			yes	Field trial 2013 (University of Adelaide, Urrbrae, South Australia, Australia)
DPG_965	YECORA 70	1	T. aestivum variety	CHILE	1970	OK	Early to mid maturing	yes	Pilot experiment 2015 (University of Adelaide, Urrbrae, South Australia, Australia)	yes	Field trial 2013 (University of Adelaide, Urrbrae, South Australia, Australia)	yes	Australian Grains Genebank
DPG_967	YITPI	4	T. aestivum variety	AUSTRALIA	2000	OK	Early to mid maturing	yes	Pilot experiment 2015 (University of Adelaide, Urrbrae, South Australia, Australia)	yes	Field trial 2013 (University of Adelaide, Urrbrae, South Australia, Australia)
DPG_968	Young	3	T. aestivum variety	AUSTRALIA (Victoria)	2005	OK	Early to mid maturing	yes	Pilot experiment 2015 (University of Adelaide, Urrbrae, South Australia, Australia)	yes	Field trial 2013 (University of Adelaide, Urrbrae, South Australia, Australia)
DPG_973	ZEBU	1	T. aestivum variety	AUSTRALIA (South Australia)	2008	Unsure	Early to mid maturing	yes	Pilot experiment 2015 (University of Adelaide, Urrbrae, South Australia, Australia)
DPG_975	ZILVE	2	T. aestivum variety	TURKEY	na	Unsure	Late maturing	yes	Pilot experiment 2015 (University of Adelaide, Urrbrae, South Australia, Australia)			yes	INRA Spring Wheat Collection
DPG_976	ZIPPY	Admixed	T. aestivum variety	AUSTRALIA	2009	OK	Early to mid maturing			yes	Field trial 2013 (University of Adelaide, Urrbrae, South Australia, Australia)
DPG_980	AE.SQUARROSA (1026)	1	Synthetic hexaploid (DOY1/AE.SQUARROSA (1026)//WARIGAL 5R/3/SUNCO)	MEXICO (CIMMYT)	na	OK	Early to mid maturing	yes	Pilot experiment 2015 (University of Adelaide, Urrbrae, South Australia, Australia)	yes	Field trial 2013 (University of Adelaide, Urrbrae, South Australia, Australia)
DPG_981	AE.SQUARROSA (1027)	1	Synthetic hexaploid (CETA/AE.SQUARROSA (1027))	MEXICO (CIMMYT)	na	OK	Late maturing	yes	Pilot experiment 2015 (University of Adelaide, Urrbrae, South Australia, Australia)
DPG_987	AE.SQUARROSA (205)	1	Synthetic hexaploid (OCI//TJB368.251/BUC/3/CROC_1/AE.SQUARROSA (205)//KAUZ/4/NL 682)	MEXICO (CIMMYT)	na	OK	Early to mid maturing	yes	Pilot experiment 2015 (University of Adelaide, Urrbrae, South Australia, Australia)	yes	Field trial 2013 (University of Adelaide, Urrbrae, South Australia, Australia)
DPG_988	AE.SQUARROSA (208)	1	Synthetic hexaploid (CPI/GEDIZ/3/GOO//JO69/CRA/4/AE.SQUARROSA (208)/5/HAHN/2*WEAVER)	MEXICO (CIMMYT)	na	OK	Early to mid maturing	yes	Pilot experiment 2015 (University of Adelaide, Urrbrae, South Australia, Australia)	yes	Field trial 2013 (University of Adelaide, Urrbrae, South Australia, Australia)
DPG_989	AE.SQUARROSA (210)	1	na	MEXICO (CIMMYT)	na	OK	Early to mid maturing	yes	Pilot experiment 2015 (University of Adelaide, Urrbrae, South Australia, Australia)	yes	Field trial 2013 (University of Adelaide, Urrbrae, South Australia, Australia)
DPG_991	AE.SQUARROSA (213)	1	Synthetic hexaploid (CROC_1/AE.SQUARROSA (213)//PGO/3/CMH81.38/2*KAUZ)	MEXICO (CIMMYT)	na	OK	Early to mid maturing	yes	Pilot experiment 2015 (University of Adelaide, Urrbrae, South Australia, Australia)	yes	Pilot experiment 2015 (University of Adelaide, Urrbrae, South Australia, Australia)
DPG_992	AE.SQUARROSA (214)	Admixed	Synthetic hexaploid (DVERD_2/AE.SQUARROSA (214)//2*BCN/3/2*RAC710)	MEXICO (CIMMYT)	na	OK	Early to mid maturing	yes	Pilot experiment 2015 (University of Adelaide, Urrbrae, South Australia, Australia)	yes	Field trial 2013 (University of Adelaide, Urrbrae, South Australia, Australia)
DPG_995	AE.SQUARROSA (221)	1	Synthetic hexaploid (ALTAR 84/AE.SQUARROSA (221)//PASTOR/3/PASTOR)	MEXICO (CIMMYT)	na	OK	Early to mid maturing	yes	Pilot experiment 2015 (University of Adelaide, Urrbrae, South Australia, Australia)	yes	Field trial 2013 (University of Adelaide, Urrbrae, South Australia, Australia)
DPG_998	AE.SQUARROSA (309)	1	Synthetic hexaploid (ACO89/AE.SQUARROSA (309)//RAC710)	MEXICO (CIMMYT)	na	OK	Early to mid maturing	yes	Pilot experiment 2015 (University of Adelaide, Urrbrae, South Australia, Australia)	yes	Field trial 2013 (University of Adelaide, Urrbrae, South Australia, Australia)
EGA Gregory	EGA Gregory	na	T. aestivum variety	AUSTRALIA	2004	Not genotyped	Early to mid maturing	yes	Pilot experiment 2015 (University of Adelaide, Urrbrae, South Australia, Australia)
Kauz	Kauz	na	T. aestivum variety	AUSTRALIA	na	Not genotyped	Early to mid maturing	yes	Pilot experiment 2015 (University of Adelaide, Urrbrae, South Australia, Australia)
WSNP92K.066.06250	BEAUFORT	na	T. aestivum variety	AUSTRALIA	na	OK	Early to mid maturing			yes	Australian Grains Genebank
WSNP92K.066.06251	BINNU	na	T. aestivum variety	AUSTRALIA	2006	OK	Early to mid maturing			yes	Australian Grains Genebank
WSNP92K.066.06260	PUGSLEY	na	T. aestivum variety	AUSTRALIA	2003	OK	Early to mid maturing			yes	Australian Grains Genebank
WSNP92K.066.06309	KALANNIE	na	T. aestivum variety	AUSTRALIA	na	OK	Early to mid maturing			yes	Australian Grains Genebank
WSNP92K.104.09710	SUNGUARD	na	T. aestivum variety	AUSTRALIA	2012	OK	Early to mid maturing			yes	Australian Grains Genebank
WSNP92K.104.09713	WALLUP	na	T. aestivum variety	AUSTRALIA	2012	OK	Early to mid maturing			yes	Australian Grains Genebank

## Sheet: Table S2
Supplementary Table 2. KASPTM marker assisted selection for the development of near-isogenic lines. Dark green indicates the exotic allele, bright green the non-exotic allele in the target region.
										KASPTM genotyping				Genotyping results BC1F5									Genotyping results BC1F6
KASPTM marker name	90k SNP marker name	Chromsome	Interval of KASP markers on RefSeq v1.0 (bp)	Gene	SNP	Allele specific primer 1	Allele specific primer 2	Common primer	Reference	BC1F4	BC1F5	BC1F6		NIL Pair 1-exotic	NIL Pair 1-non-exotic	NIL Pair 2-exotic	NIL Pair 2-non-exotic	NIL Pair 3-exotic	NIL Pair 3-non-exotic	NIL Pair 4-exotic	NIL Pair 4-non-exotic		NIL Pair 1-exotic rep1	NIL Pair 1-exotic rep2	NIL Pair 1-exotic rep3	NIL Pair 1-non-exotic rep1	NIL Pair 1-non-exotic rep2	NIL Pair 1-non-exotic rep3	NIL Pair 2-exotic rep1	NIL Pair 2-exotic rep2	NIL Pair 2-exotic rep3	NIL Pair 2-non-exotic rep1	NIL Pair 2-non-exotic rep2	NIL Pair 3-exotic rep1	NIL Pair 3-exotic rep2	NIL Pair 3-exotic rep3	NIL Pair 4-non-exotic rep1	NIL Pair 4-non-exotic rep2	NIL Pair 4-non-exotic rep3	NIL Pair 4-exotic rep1	NIL Pair 4-exotic rep2	NIL Pair 4-exotic rep3	NIL Pair 4-non-exotic rep1	NIL Pair 4-non-exotic rep2	NIL Pair 4-non-exotic rep3
6A_118917_01	RAC875_s119505_143	6A	15,728,423-15,728,470	TraesCS6A01G030700	A/C	GAAGGTGACCAAGTTCATGCTCCTGGCACGAAGTAGGCAATTCT	GAAGGTCGGAGTCAACGGATTCTGGCACGAAGTAGGCAATTCG	GGTGCCACGCCCTTTGTAGCAT	In-house	yes	yes	yes		A:A	C:C	A:A	C:C	A:A	C:C	A:A	C:C		A:A	A:A	A:A	C:C	C:C	C:C	A:A	A:A	A:A	C:C	C:C	A:A	A:A	A:A	C:C	C:C	C:C	A:A	A:A	A:A	C:C	C:C	C:C
6A_118917_03	-	6A	15,737,660-15,737,717	TraesCS6A01G038900LC	A/G	GAAGGTGACCAAGTTCATGCTAGTTGTCAGAGGAGAGCAGATCTA	GAAGGTCGGAGTCAACGGATTGTTGTCAGAGGAGAGCAGATCTG	CGTCGTAGATCACCCTCGCCAA	In-house			yes											A:A	A:A	A:A	G:G	G:G	G:G	A:A	A:A	A:A	G:G	G:G	A:A	A:A	A:A	G:G	G:G	G:G	A:A	A:A	A:A	G:G	G:G	G:G
6A_118917_04	-	6A	15,744,580-15,744,628	TraesCS6A01G038900LC	T/C	GAAGGTGACCAAGTTCATGCTGAGGGAGGACGCAAAAATTGAACTAT	GAAGGTCGGAGTCAACGGATTAGGGAGGACGCAAAAATTGAACTAC	TCCAGCAGTCTTGCGCCCTGTT	In-house			yes											T:T	T:T	T:T	C:C	C:C	C:C	T:T	T:T	T:T	C:C	C:C	T:T	T:T	T:T	C:C	C:C	C:C	T:T	T:T	T:T	C:C	C:C	C:C
6A_118917_05	Kukri_c18874_1239	6A	15,748,713-15,748,761	TraesCS6A01G030900	T/C	GAAGGTGACCAAGTTCATGCTGCCTGGAAACGAATGGTGCAACA	GAAGGTCGGAGTCAACGGATTCCTGGAAACGAATGGTGCAACG	CAAGCTGCATGTGGCGCTGTCTT	In-house			yes											T:T	T:T	T:T	C:C	C:C	C:C	T:T	T:T	?	C:C	C:C	T:T	T:T	T:T	C:C	C:C	C:C	T:T	T:T	T:T	C:C	C:C	C:C
6B_119265_02	BobWhite_c27364_296	6B	713,513,485-713,513,529	-	A/G	GAAGGTGACCAAGTTCATGCTCGGGAGAACGCGAGGACCAAT	GAAGGTCGGAGTCAACGGATTGGGAGAACGCGAGGACCAAC	ACGCGGAGGTGGTTCTCTCCAT	In-house		yes	yes		G:G	G:G	A:A	A:A	G:G	?	A:A	A:A		G:G	G:G	G:G	G:G	G:G	G:G	A:A	A:A	A:A	A:A	A:A	G:G	G:G	G:G	G:G	G:G	G:G	?	?	?	?	?	?
6B_119265_06	wsnp_Ex_c11573_18650189	6B	713,149,515-713,149,563	TraesCS6B01G458800	A/G	GAAGGTGACCAAGTTCATGCTAGGGCCTCACCTGCCTCCA	GAAGGTCGGAGTCAACGGATTGGGCCTCACCTGCCTCCG	CCTCCAAATCAAAAATAAGCGTTAGGCTT	In-house			yes											G:G	G:G	G:G	G:G	G:G	G:G	G:G	G:G	G:G	G:G	G:G	G:G	G:G	G:G	G:G	G:G	G:G	G:G	G:G	G:G	G:G	G:G	G:G
6B_119265_08	-	6B	713,462,432-713,462,498	TraesCS6B01G458200	T/C	GAAGGTGACCAAGTTCATGCTTCTTTCTCATCAAAAGCTCCACT	GAAGGTCGGAGTCAACGGATTCTTCTTTCTCATCAAAAGCTCCACC	CTGAGTGAGAAGAGTGATGTTTATAGCTT	In-house			yes											C:C	C:C	C:C	C:C	C:C	C:C	C:C	C:C	C:C	C:C	C:C	C:C	C:C	C:C	C:C	C:C	C:C	T:T	T:T	T:T	T:T	T:T	T:T
6B_119265_10	Ra_c23853_324	6B	712,997,417-712,997,467	TraesCS6B01G456800	A/G	GAAGGTGACCAAGTTCATGCTGCCTTTCAGACTCTTTCCTCTGT	GAAGGTCGGAGTCAACGGATTGCCTTTCAGACTCTTTCCTCTGC	CACCTGACGTCATTGATCTTCGGAA	In-house			yes											A:A	A:A	A:A	A:A	A:A	A:A	G:G	G:G	G:G	G:G	G:G	G:G	G:G	G:G	G:G	G:G	G:G	A:A	A:A	A:A	A:A	A:A	A:A
6B_39100_04	CAP12_c67_212	6B	708,047,370-708,047,414	TraesCS6B01G447700	T/C	GAAGGTGACCAAGTTCATGCTCCAGCATGCTCTCCGACGCA	GAAGGTCGGAGTCAACGGATTCAGCATGCTCTCCGACGCG	AGTTCGGCAAGATTGGGAGGTACTA	In-house		yes	yes		C:C	C:C	C:C	C:C	C:C	C:C	C:C	C:C		C:C	C:C	C:C	C:C	C:C	C:C	C:C	C:C	C:C	C:C	C:C	C:C	C:C	C:C	C:C	C:C	C:C	C:C	C:C	C:C	C:C	C:C	C:C
BS00017267	BS00017267_51	4A	21,063,786-21,063,839	TraesCS4A01G028900	T/G	GAAGAAGCTCAAAGAGATGGAGTCT	AAGAAGCTCAAAGAGATGGAGTCG	ATACCAGACTCCAAGAACATGTCTCTTT	Wang et al (2014) PBJ 12: 787-796 (https://onlinelibrary.wiley.com/doi/epdf/10.1111/pbi.12183)		yes	yes		G:G	G:G	G:G	G:G	G:G	G:G	G:G	G:G		G:G	G:G	G:G	G:G	G:G	G:G	G:G	G:G	G:G	G:G	G:G	G:G	G:G	G:G	G:G	G:G	G:G	G:G	G:G	G:G	G:G	G:G	G:G
KASParMAS021	-	1D	410,464,670-410,464,717	GluD1	T/G	CGCTAATCCTGCGAGCAACAAAT	CGCTAATCCTGCGAGCAACAAAG	AGCCAAGGGCATGTTCTATGTCGAA	In-house		yes			GLUD1- LINKED TO 5+10:GLUD1- LINKED TO 5+10	GLUD1- LINKED TO 5+10:GLUD1- LINKED TO 5+10	GLUD1- LINKED TO 2+12:GLUD1- LINKED TO 2+12	GLUD1- LINKED TO 2+12:GLUD1- LINKED TO 2+12	GLUD1- LINKED TO 5+10:GLUD1- LINKED TO 5+10	GLUD1- LINKED TO 5+10:GLUD1- LINKED TO 5+10	GLUD1- LINKED TO 5+10:GLUD1- LINKED TO 5+10	GLUD1- LINKED TO 5+10:GLUD1- LINKED TO 5+10
wMAS000001	-	4B	30,861,518-30,861,590	Rht-B1	G/A	CCCATGGCCATCTCSAGCTG	CCCATGGCCATCTCSAGCTA	TCGGGTACAAGGTGCGGGCG	Ellis et al (2002) TAG 105:1038-1042 (http://www.springerlink.com/content/5wbhn253cn7w857x/fulltext.pdf)		yes	yes		RHT-B1A-WT:RHT-B1A-WT	RHT-B1A-WT:RHT-B1A-WT	RHT-B1A-WT:RHT-B1A-WT	RHT-B1A-WT:RHT-B1A-WT	RHT-B1A-WT:RHT-B1A-WT	RHT-B1A-WT:RHT-B1A-WT	RHT-B1A-WT:RHT-B1A-WT	RHT-B1A-WT:RHT-B1A-WT		RHT-B1A-WT:RHT-B1A-WT	RHT-B1A-WT:RHT-B1A-WT	RHT-B1A-WT:RHT-B1A-WT	RHT-B1A-WT:RHT-B1A-WT	RHT-B1A-WT:RHT-B1A-WT	RHT-B1A-WT:RHT-B1A-WT	RHT-B1A-WT:RHT-B1A-WT	RHT-B1A-WT:RHT-B1A-WT	?	?	RHT-B1A-WT:RHT-B1A-WT	RHT-B1A-WT:RHT-B1A-WT	RHT-B1A-WT:RHT-B1A-WT	RHT-B1A-WT:RHT-B1A-WT	RHT-B1A-WT:RHT-B1A-WT	?	RHT-B1A-WT:RHT-B1A-WT	RHT-B1A-WT:RHT-B1A-WT	?	RHT-B1A-WT:RHT-B1A-WT	RHT-B1A-WT:RHT-B1A-WT	RHT-B1A-WT:RHT-B1A-WT	RHT-B1A-WT:RHT-B1A-WT
wMAS000002	-	4D	18,781,193-18,781,262	Rht-D1	C/A	CATGGCCATCTCGAGCTRCTC	CATGGCCATCTCGAGCTRCTA	CGGGTACAAGGTGCGCGCC	Ellis et al (2002) TAG 105:1038-1042 (http://www.springerlink.com/content/5wbhn253cn7w857x/fulltext.pdf)		yes			RHT-D1A -WT:RHT-D1A -WT	RHT-D1A -WT:RHT-D1A -WT	RHT-D1B -DWARF:RHT-D1B -DWARF	RHT-D1B -DWARF:RHT-D1B -DWARF	RHT-D1B -DWARF:RHT-D1B -DWARF	RHT-D1B -DWARF:RHT-D1B -DWARF	RHT-D1B -DWARF:RHT-D1B -DWARF	RHT-D1B -DWARF:RHT-D1B -DWARF
wMAS000018	-	5D	3,609,867-3,609,911	Pinb-D1	C/T	CTCATGCTCACAGCCGCC	CCTCATGCTCACAGCCGCT	GTCACCTGGCCCACAAAATG	Giroux and Morris (1997) TAG 95:857-864 (https://link.springer.com/content/pdf/10.1007%2Fs001220050636.pdf)		yes	yes		PINB-D1B MUTANT:PINB-D1B MUTANT	PINB-D1B MUTANT:PINB-D1B MUTANT	PINB-D1B MUTANT:PINB-D1B MUTANT	PINB-D1B MUTANT:PINB-D1B MUTANT	PINB-D1B MUTANT:PINB-D1B MUTANT	?	PINB-D1A WT:PINB-D1A WT	PINB-D1A WT:PINB-D1A WT		PINB-D1B MUTANT:PINB-D1B MUTANT	PINB-D1B MUTANT:PINB-D1B MUTANT	PINB-D1B MUTANT:PINB-D1B MUTANT	PINB-D1B MUTANT:PINB-D1B MUTANT	PINB-D1B MUTANT:PINB-D1B MUTANT	PINB-D1B MUTANT:PINB-D1B MUTANT	PINB-D1B MUTANT:PINB-D1B MUTANT	PINB-D1B MUTANT:PINB-D1B MUTANT	PINB-D1B MUTANT:PINB-D1B MUTANT	PINB-D1B MUTANT:PINB-D1B MUTANT	PINB-D1B MUTANT:PINB-D1B MUTANT	PINB-D1B MUTANT:PINB-D1B MUTANT	PINB-D1B MUTANT:PINB-D1B MUTANT	PINB-D1B MUTANT:PINB-D1B MUTANT	?	?	?	PINB-D1A WT:PINB-D1A WT	PINB-D1A WT:PINB-D1A WT	PINB-D1A WT:PINB-D1A WT	PINB-D1A WT:PINB-D1A WT	PINB-D1A WT:PINB-D1A WT	PINB-D1A WT:PINB-D1A WT
wMAS000024	-	2D	33,957,749-33,957,796	Ppd-D1	C/T	AAGAGGAAACATGTTGGGGTCC	CAAGGAAGTATGAGCAGCGGTT	GCCTCCCACTACACTGGGC	Beales et al (2007) TAG 115:721-733 (http://www.springerlink.com/content/j00h0g633250q762/fulltext.pdf)		yes	yes		PPD-D1-INS:PPD-D1-INS	PPD-D1-INS:PPD-D1-INS	PPD-D1-INS:PPD-D1-INS	PPD-D1-INS:PPD-D1-INS	PPD-D1-INS:PPD-D1-INS	PPD-D1-INS:PPD-D1-INS	PPD-D1-SEN:PPD-D1-SEN	PPD-D1-SEN:PPD-D1-SEN		PPD-D1-INS:PPD-D1-INS	PPD-D1-INS:PPD-D1-INS	PPD-D1-INS:PPD-D1-INS	PPD-D1-INS:PPD-D1-INS	PPD-D1-INS:PPD-D1-INS	PPD-D1-INS:PPD-D1-INS	PPD-D1-INS:PPD-D1-INS	PPD-D1-INS:PPD-D1-INS	PPD-D1-INS:PPD-D1-INS	PPD-D1-INS:PPD-D1-INS	PPD-D1-INS:PPD-D1-INS	PPD-D1-INS:PPD-D1-INS	PPD-D1-INS:PPD-D1-INS	PPD-D1-INS:PPD-D1-INS	PPD-D1-INS:PPD-D1-INS	PPD-D1-INS:PPD-D1-INS	PPD-D1-INS:PPD-D1-INS	PPD-D1-SEN:PPD-D1-SEN	PPD-D1-SEN:PPD-D1-SEN	PPD-D1-SEN:PPD-D1-SEN	PPD-D1-SEN:PPD-D1-SEN	PPD-D1-SEN:PPD-D1-SEN	PPD-D1-SEN:PPD-D1-SEN
wMAS000033	wsnp_AJ612027A_Ta_2_1	5A	588,550,239-588,550,309	Vrn-A1	T/C	AGAGTTTTCCAAAAAGATAGATCAATGTAAAT	GAGTTTTCCAAAAAGATAGATCAATGTAAAC	GTTAGTAGTGATGGTCCAATAATGCCAAA	Wang et al (2014) PBJ 12: 787-796 (https://onlinelibrary.wiley.com/doi/epdf/10.1111/pbi.12183)		yes	yes		SPRINGALLELE:SPRINGALLELE	SPRINGALLELE:SPRINGALLELE	SPRINGALLELE:SPRINGALLELE	SPRINGALLELE:SPRINGALLELE	SPRINGALLELE:SPRINGALLELE	SPRINGALLELE:SPRINGALLELE	WINTERALLELE:WINTERALLELE	WINTERALLELE:WINTERALLELE		SPRINGALLELE:SPRINGALLELE	SPRINGALLELE:SPRINGALLELE	SPRINGALLELE:SPRINGALLELE	SPRINGALLELE:SPRINGALLELE	SPRINGALLELE:SPRINGALLELE	SPRINGALLELE:SPRINGALLELE	SPRINGALLELE:SPRINGALLELE	SPRINGALLELE:SPRINGALLELE	SPRINGALLELE:SPRINGALLELE	SPRINGALLELE:SPRINGALLELE	SPRINGALLELE:SPRINGALLELE	SPRINGALLELE:SPRINGALLELE	SPRINGALLELE:SPRINGALLELE	SPRINGALLELE:SPRINGALLELE	SPRINGALLELE:SPRINGALLELE	SPRINGALLELE:SPRINGALLELE	SPRINGALLELE:SPRINGALLELE	WINTERALLELE:WINTERALLELE	WINTERALLELE:WINTERALLELE	WINTERALLELE:WINTERALLELE	WINTERALLELE:WINTERALLELE	WINTERALLELE:WINTERALLELE	WINTERALLELE:WINTERALLELE
wMAS000035	-	5A	587,423,348-587,423,416	Vrn-A1	C/A	GTTTTGGCCTGGCCATCCTCC	GTTTTGGCCTGGCCATCCTCA	TATCAGGTGGTTGGGTGAGGACGT	Yan et al (2004) TAG 109:1677-1686 (http://www.springerlink.com/content/k8pl10ynryq3fgb3/fulltext.pdf)		yes	yes		VRN-A1W/OTHERS:VRN-A1W/OTHERS	VRN-A1W/OTHERS:VRN-A1W/OTHERS	VRN-A1W/OTHERS:VRN-A1W/OTHERS	VRN-A1W/OTHERS:VRN-A1W/OTHERS	VRN-A1W/OTHERS:VRN-A1W/OTHERS	VRN-A1W/OTHERS:VRN-A1W/OTHERS	VRN-A1W/OTHERS:VRN-A1W/OTHERS	VRN-A1W/OTHERS:VRN-A1W/OTHERS		VRN-A1W/OTHERS:VRN-A1W/OTHERS	VRN-A1W/OTHERS:VRN-A1W/OTHERS	VRN-A1W/OTHERS:VRN-A1W/OTHERS	VRN-A1W/OTHERS:VRN-A1W/OTHERS	VRN-A1W/OTHERS:VRN-A1W/OTHERS	VRN-A1W/OTHERS:VRN-A1W/OTHERS	VRN-A1W/OTHERS:VRN-A1W/OTHERS	VRN-A1W/OTHERS:VRN-A1W/OTHERS	VRN-A1W/OTHERS:VRN-A1W/OTHERS	VRN-A1W/OTHERS:VRN-A1W/OTHERS	VRN-A1W/OTHERS:VRN-A1W/OTHERS	VRN-A1W/OTHERS:VRN-A1W/OTHERS	VRN-A1W/OTHERS:VRN-A1W/OTHERS	VRN-A1W/OTHERS:VRN-A1W/OTHERS	VRN-A1W/OTHERS:VRN-A1W/OTHERS	VRN-A1W/OTHERS:VRN-A1W/OTHERS	VRN-A1W/OTHERS:VRN-A1W/OTHERS	VRN-A1W/OTHERS:VRN-A1W/OTHERS	VRN-A1W/OTHERS:VRN-A1W/OTHERS	VRN-A1W/OTHERS:VRN-A1W/OTHERS	VRN-A1W/OTHERS:VRN-A1W/OTHERS	VRN-A1W/OTHERS:VRN-A1W/OTHERS	VRN-A1W/OTHERS:VRN-A1W/OTHERS

## Sheet: Table S3
Supplementary Table 3. Pearson correlation coefficients (R2) of traits measured under drought and combined drought and heat during genome-wide association studies (A, B) and during the QTL validation in 2018 (C). *, ** and *** indicate statistical significance at p ≤ 0.05, p ≤ 0.01 and p ≤ 0.001, respectively. DTA, days to anthesis; LWP, leaf water potential; SPAD, chlorophyll content; SPN, numbe…
A. Drought treatment of 2016 and 2017 experiments
Trait	DTA	LWP	SPAD	SPN	SPL	PH	BM	SCRt	SCRp	GNt	GNp	SGWt	SGWp	GWt	GWp	HI
DTA	1	-0.48***	-0.34***	0.29***	0.10*	0.26***	0.39***	0.54***	0.52***	-0.59***	-0.51***	-0.59***	-0.57***	-0.65***	-0.61***	-0.78***
LWP		1	-0.02	-0.43***	-0.20***	-0.34***	-0.41***	-0.70***	-0.71***	0.58***	0.44***	0.66***	0.64***	0.60***	0.52***	0.68***
SPAD			1	0.01	0.07*	-0.13**	0.00	-0.05	-0.03	0.12**	0.14***	0.14***	0.13**	0.18***	0.20***	0.10*
SPN				1	-0.03	0.28***	0.56***	0.34***	0.33***	-0.46***	0.04	-0.39***	-0.40***	-0.50***	-0.09*	-0.48***
SPL					1	0.27***	0.40***	0.11**	0.10*	0.07*	0.06	-0.04	-0.02	0.08*	0.08*	-0.16***
PH						1	0.67***	0.18***	0.16***	-0.26***	-0.01	-0.07*	-0.08*	-0.16***	0.04	-0.39***
BM							1	0.27***	0.23***	-0.22***	0.13***	-0.21***	-0.19***	-0.19***	0.12**	-0.49***
SCRt								1	0.94***	-0.71***	-0.60***	-0.84***	-0.76***	-0.71***	-0.66***	-0.71***
SCRp									1	-0.66***	-0.59***	-0.82***	-0.80***	-0.68***	-0.65***	-0.70***
GNt										1	0.75***	0.55***	0.50***	0.89***	0.72***	0.79***
GNp											1	0.43***	0.36***	0.63***	0.88***	0.63***
SGWt												1	0.95***	0.78***	0.70***	0.71***
SGWp													1	0.76***	0.67***	0.68***
GWt														1	0.81***	0.84***
GWp															1	0.73***
HI																1
B. Combined drought and heat treatment of 2016 and 2017 experiments
Trait	DTA	LWP	SPAD	SPN	SPL	PH	BM	SCRt	SCRp	GNt	GNp	SGWt	SGWp	GWt	GWp	HI
DTA	1	-0.58***	-0.26***	0.28***	0.01	0.25***	0.65***	0.27***	0.28***	-0.27***	-0.25***	-0.29***	-0.32***	-0.25***	-0.24***	-0.28***
LWP		1	-0.16***	-0.41***	-0.16***	-0.31***	-0.61***	-0.34***	-0.38***	0.34***	0.37***	0.36***	0.41***	0.32***	0.34***	0.35***
SPAD			1	0.05	0.19***	-0.10*	-0.05	0.10*	0.14***	-0.10*	-0.17***	-0.12**	-0.16***	-0.11**	-0.17***	-0.18***
SPN				1	-0.08*	0.29***	0.46***	0.18***	0.18***	-0.23***	-0.19***	-0.19***	-0.18***	-0.21***	-0.17***	-0.23***
SPL					1	0.25***	0.32***	0.11**	0.13**	-0.10*	-0.14***	-0.10*	-0.12**	-0.09*	-0.12**	-0.16***
PH						1	0.63***	0.00	0.00	-0.04	-0.02	-0.01	-0.03	-0.01	0.01	-0.06
BM							1	0.21***	0.23**	-0.21***	-0.20***	-0.23***	-0.25***	-0.19***	-0.19***	-0.25***
SCRt								1	0.94***	-0.95***	-0.87***	-0.94***	-0.82***	-0.94***	-0.87***	-0.86***
SCRp									1	-0.90***	-0.92***	-0.90***	-0.90***	-0.90***	-0.91***	-0.90***
GNt										1	0.91***	0.87***	0.78***	0.96***	0.89***	0.89***
GNp											1	0.81***	0.79***	0.90***	0.97***	0.94***
SGWt												1	0.88***	0.90***	0.84***	0.83***
SGWp													1	0.80***	0.81***	0.80***
GWt														1	0.93***	0.92***
GWp															1	0.96***
HI																1
C. Combined drought and heat treatment of 2018 experiment
Trait	DTA	SPN	SPL	PH	BM	SCRs	SCR	GNs	GN	SGWs	TKW	GWs	GW	HI
DTA	1	-0.16	-0.84**	0.90***	0.37	-0.70*	-0.70*	-0.67*	-0.30	0.73*	0.72*	-0.39	-0.07	-0.70*
SPN		1	0.49	-0.11	0.59	-0.08	-0.29	-0.03	0.68*	-0.40	-0.42	-0.26	0.58	0.24
SPL			1	-0.83**	-0.10	0.63*	0.59	0.74*	0.63*	-0.90**	-0.92**	0.37	0.36	0.80*
PH				1	0.35	-0.89**	-0.74*	-0.69*	-0.35	0.74*	0.71*	-0.42	-0.13	-0.79*
BM					1	-0.19	-0.49	-0.08	0.70*	0.25	0.27	0.13	0.86**	0.17
SCRs						1	0.73*	0.70*	0.39	-0.44	-0.41	0.62*	0.27	0.81*
SCR							1	0.80*	0.11	-0.54	-0.54	0.61	-0.07	0.57
GNs								1	0.56	-0.65*	-0.64*	0.86**	0.40	0.88**
GN									1	-0.43	-0.42	0.50	0.95***	0.77*
SGWs										1	0.98***	-0.19	-0.12	-0.61
TKW											1	-0.17	-0.10	-0.58
GWs												1	0.50	0.78*
GW													1	0.64*
HI														1

## Sheet: Table S4
Supplementary Table 4. List of significant marker-trait associations. Position in base pairs (bp) corresponds to RefSeq v1.0 (IWGSC, 2018). cM, centi Morgan; D, drought; DH, combined drought and heat; FDR, false discovery rate; MTA, marker trait association; QTL, quantitative trait loci; ratio, heat response under drougth. Adj, QTL for traits adjusted for days to anthesis; non-adj, QTL for traits…
Genomic region	QTL	Chromosome	Trait	Treatment	Year	Number of MTA	Strongest MTA	Flanking marker (downstream)	Flanking marker (upstream)	Corresponding gene	Position (cM)	Position (bp)	Allelic effect (R2)	FDR	Adjusted for days to anthesis
QTL1	QLWP.adr-1A.1	1A	Leaf water potential	Drought	2016	2	BS00078401_51	Excalibur_c11330_695	BS00078401_51		na	8631543-14255960	0.169	0.05	non-adj & adj
	QLWP.adr-1A.1	1A	Leaf water potential	Drought	2017	1	BS00078401_51	-	-		na	14255859-14255960	0.053	0.05	adj
	QSWp.ara-1A.1	1A	Seed weight per plant	Ratio	2017	1	BS00078401_51	-	-		na	14255859-14255960	0.101	0.05	non-adj
	QSWt.ara-1A.1	1A	Seed weight per primary tiller	Ratio	2017	1	D_contig33959_220	-	-		na	6022769-6023009	0.038	0.2	non-adj
QTL2	QHI.ara-1A.1	1A	Harvest index	Ratio	2017	1	BS00096724_51	-	-		na	42511260-42511342	0.036	0.2	non-adj
	QLWP.adr-1A.2	1A	Leaf water potential	Drought	2016	2	Kukri_c97137_329	BS00096724_51	Kukri_c97137_329		na	42511260-44364200	0.054-0.056	0.05	non-adj & adj
	QSCRp.adr-1A.1	1A	Screenings per plant	Drought	2017	1	BS00029346_51	-	-		187.49	37501035-37501136	0.053	0.2	non-adj
	QSCRt.adr-1A.1	1A	Screenings per primary tiller	Drought	2017	1	BS00029346_51	-	-		187.49	37501035-37501136	0.052	0.2	non-adj
	QSWp.ara-1A.1	1A	Seed weight per plant	Ratio	2017	1	BS00096724_51	-	-		na	42511260-42511342	0.051	0.2	non-adj
	QSWt.ara-1A.2	1A	Seed weight per primary tiller	Ratio	2017	1	BS00096724_51	-	-		na	42511260-42511342	0.049	0.05	non-adj
QTL3	QHI.ara-1A.2	1A	Harvest index	Ratio	2017	1	tplb0061k05_719	-	-		na	272612917-272612987	0.045	0.2	non-adj
	QSWt.ara-1A.3	1A	Seed weight per primary tiller	Ratio	2017	1	tplb0061k05_719	-	-		na	272612917-272612987	0.045	0.05	non-adj
QTL4	QHI.ara-1A.3	1A	Harvest index	Ratio	2017	1	RAC875_rep_c111214_304	-	-		216.46	335998137-335998238	0.04	0.2	non-adj
	QSWt.ara-1A.4	1A	Seed weight per primary tiller	Ratio	2017	1	RAC875_rep_c111214_304	-	-		216.46	335998137-335998238	0.057	0.05	non-adj
QTL5	QLWP.adr-1A.3	1A	Leaf water potential	Drought	2016	1	RAC875_c86680_391	-	-		na	464810298-464810398	0.044	0.2	non-adj
	QSCRt.adr-1A.2	1A	Screenings per primary tiller	Drought	2016	1	BS00016654_51	-	-		na	463288388-463288484	0.047	0.2	non-adj
QTL6	QLWP.ara-1A	1A	Leaf water potential	Ratio	2016	1	Kukri_c24715_175	-	-		na	498049972-498050058	0.067	0.2	non-adj
	QSCRp.adr-1A.2	1A	Screenings per plant	Drought	2016	4	wsnp_BM140362A_Ta_2_2	wsnp_BM140362A_Ta_2_2	BS00079538_51		260.4-264.6	507079982-508925335	0.040-0.047	0.2	non-adj
	QSCRt.adr-1A.3	1A	Screenings per primary tiller	Drought	2016	3	wsnp_BM140362A_Ta_2_2	wsnp_BM140362A_Ta_2_2	wsnp_BM137879A_Ta_2_1		260.38	507079982-516787685	0.045-0.046	0.2	non-adj
QTL7	QSCRp.adr-1A.3	1A	Screenings per plant	Drought	2017	1	BS00020241_51	-	-		na	537352761-537352861	0.039	0.2	non-adj
	QSWt.ara-1A.5	1A	Seed weight per primary tiller	Ratio	2017	1	BS00075532_51	-	-		na	537828357-537828457	0.055	0.05	non-adj
QTL8	QHI.ara-1A.4	1A	Harvest index	Ratio	2017	1	Ex_c3201_1046	-	-		431.5	579299114-579299197	0.042	0.2	non-adj
	QSWt.ara-1A.6	1A	Seed weight per primary tiller	Ratio	2016	1	IACX882	-	-		435.16	581438451-581438572	0.087	0.05	non-adj
	QSWt.ara-1A.6	1A	Seed weight per primary tiller	Ratio	2017	1	Ex_c3201_1046	-	-		431.5	579299114-579299197	0.05	0.05	non-adj
	QSSWp.ara-1A	1A	Single seed weight per plant	Ratio	2016	1	IACX882	-	-		435.16	581438451-581438572	0.074	0.05	non-adj
	QSSWt.ara-1A	1A	Single seed weight per primary tiller	Ratio	2016	1	IACX882	-	-		435.16	581438451-581438572	0.107	0.05	non-adj
QTL9	QLWP.adh-1B	1B	Leaf water potential	Drought & heat	2016	1	Ku_c13532_1753	-	-		195.12	119121139-119121236	0.041	0.2	adj
	QLWP.ara-1B.1	1B	Leaf water potential	Ratio	2016	1	RAC875_c68893_769	-	-		na	119121006-119121106	0.063	0.2	non-adj
QTL10	QHI.ara-1B.1	1B	Harvest index	Ratio	2017	1	Tdurum_contig48396_341	-	-		208.49	310930503-310930604	0.04	0.2	non-adj
	QLWP.adr-1B.1	1B	Leaf water potential	Drought	2016	1	Excalibur_c9495_322	-	-		na	329487235-329487335	0.035	0.2	non-adj
	QLWP.ara-1B.2	1B	Leaf water potential	Ratio	2016	1	wsnp_Ku_c28591_38511783	-	-		na	332840213-332840413	0.065	0.2	non-adj
	QSWt.ara-1B.1	1B	Seed weight per primary tiller	Ratio	2017	1	Tdurum_contig48396_341	-	-		208.49	310930503-310930604	0.053	0.05	non-adj
QTL11	QHI.ara-1B.2	1B	Harvest index	Ratio	2017	1	Tdurum_contig28182_145	-	-		na	378838624-378838724	0.067	0.05	non-adj
	QSWt.ara-1B.2	1B	Seed weight per primary tiller	Ratio	2017	1	Tdurum_contig28182_145	-	-		na	378838624-378838724	0.087	0.05	non-adj
QTL12	QHI.ara-1B.3	1B	Harvest index	Ratio	2017	1	Tdurum_contig45357_821	-	-		na	442624127-442624227	0.066	0.05	non-adj
	QSWt.ara-1B.3	1B	Seed weight per primary tiller	Ratio	2017	3	Tdurum_contig45357_821	BS00022324_51	Tdurum_contig45357_821		220.2-221.5	439129964-442624227	0.050-0.085	0.05	non-adj
QTL13	QBM.adh-1B	1B	Biomass	Drought & heat	2016	2	BS00091871_51	BS00091872_51	BS00091871_51		na	478721477-478721627	0.031-0.033	0.2	non-adj
	QLWP.adr-1B.2	1B	Leaf water potential	Drought	2016	2	BS00011918_51	Kukri_rep_c69810_502	BS00011918_51		227.0-227.2	469976427-469999625	0.069-0.076	0.05	non-adj & adj
	QSWt.ara-1B.4	1B	Seed weight per primary tiller	Ratio	2016	1	IACX1776	-	-		na	477416714-477416813	0.079	0.05	non-adj
	QSSWp.ara-1B.1	1B	Single seed weight per plant	Ratio	2016	1	IACX1776	-	-		na	477416714-477416813	0.079	0.05	non-adj
	QSSWt.ara-1B.1	1B	Single seed weight per primary tiller	Ratio	2016	1	IACX1776	-	-		na	477416714-477416813	0.068	0.05	non-adj
QTL14	QLWP.adr-1B.3	1B	Leaf water potential	Drought	2016	1	Tdurum_contig48523_1838	-	-		255.13	560504405-560504506	0.092	0.05	non-adj & adj
	QSCRp.adr-1B.1	1B	Screenings per plant	Drought	2016	1	Tdurum_contig48523_1838	-	-		255.13	560504405-560504506	0.097	0.05	non-adj & adj
	QSCRt.adr-1B.1	1B	Screenings per primary tiller	Drought	2016	1	Tdurum_contig48523_1838	-	-		255.13	560504405-560504506	0.101	0.05	non-adj & adj
	QSWt.ara-1B.5	1B	Seed weight per primary tiller	Ratio	2016	1	Tdurum_contig48523_1838	-	-		255.13	560504405-560504506	0.079	0.05	non-adj
	QSSWp.ara-1B.2	1B	Single seed weight per plant	Ratio	2016	1	Tdurum_contig48523_1838	-	-		255.13	560504405-560504506	0.049	0.2	non-adj
	QSSWt.ara-1B.2	1B	Single seed weight per primary tiller	Ratio	2016	1	Tdurum_contig48523_1838	-	-		255.13	560504405-560504506	0.072	0.05	non-adj
QTL15	QLWP.adr-1B.4	1B	Leaf water potential	Drought	2017	1	TA004264-0825	-	-		282.48	581691785-581691839	0.041	0.2	adj
	QLWP.ara-1B.3	1B	Leaf water potential	Ratio	2016	1	RAC875_c100059_123	-	-		289.04	592365613-592365713	0.068	0.2	non-adj
	QSWt.ara-1B.6	1B	Seed weight per primary tiller	Ratio	2016	1	BS00022789_51	-	-		282.48	584156288-584156389	0.044	0.2	non-adj
QTL16	QHI.ara-1B.4	1B	Harvest index	Ratio	2017	1	BobWhite_c5785_78	-	-		na	662910037-662910138	0.05	0.05	non-adj
	QLWP.adr-1B.5	1B	Leaf water potential	Drought	2016	6	RFL_Contig54_1297	RFL_Contig54_1297	BS00060612_51		449.6-452.2	661896676-669649667	0.056-0.178	0.05	non-adj & adj
	QSCRp.adr-1B.2	1B	Screenings per plant	Drought	2016	1	GENE-0223_239	-	-		449.58	669029331-669029420	0.082	0.05	adj
	QSCRt.adr-1B.2	1B	Screenings per primary tiller	Drought	2016	1	GENE-0223_239	-	-		449.58	669029331-669029420	0.087	0.05	adj
	QSWt.ara-1B.7	1B	Seed weight per primary tiller	Ratio	2017	3	RFL_Contig54_1297	RFL_Contig54_1297	BobWhite_c2540_468		na	661896676-662910138	0.045-0.058	0.05	non-adj
	QSSWt.ara-1B.3	1B	Single seed weight per primary tiller	Ratio	2016	3	GENE-0223_239	Excalibur_c35888_208	BS00060612_51		449.6-452.2	669027506-669649566	0.052	0.05	non-adj
QTL17	QHI.ara-1D.1	1D	Harvest index	Ratio	2017	3	Kukri_c1338_646 / wsnp_RFL_Contig2036_1264133	Kukri_c1338_646	wsnp_RFL_Contig2036_1264133		133.15	391310831-392554619	0.084-0.138	0.05	non-adj
	QSWt.ara-1D.1	1D	Seed weight per primary tiller	Ratio	2017	3	Kukri_c1338_646 / wsnp_RFL_Contig2036_1264133	Kukri_c1338_646	wsnp_RFL_Contig2036_1264133		133.15	391310831-392554619	0.122-0.212	0.05	non-adj
QTL18	QSWt.ara-1D.2	1D	Seed weight per primary tiller	Ratio	2016	1	Excalibur_c23473_451	-	-		105.94	423251861-423251962	0.072	0.05	non-adj
	QSSWp.ara-1D.1	1D	Single seed weight per plant	Ratio	2016	2	Excalibur_c23473_451	Excalibur_c48213_104	Excalibur_c23473_451		105.94	420651616-423251861	0.053-0.059	0.2	non-adj
QTL19	QHI.ara-1D.2	1D	Harvest index	Ratio	2017	2	CAP7_c6937_354	CAP7_c6937_354	CAP12_c2761_184		na	476905079-477185555	0.037-0.040	0.2	non-adj
	QSWt.ara-1D.3	1D	Seed weight per primary tiller	Ratio	2017	2	CAP7_c6937_354	CAP7_c6937_354	CAP12_c2761_184		na	476905079-477185555	0.049-0.058	0.05	non-adj
QTL20	QHI.ara-2A.1	2A	Harvest index	Ratio	2017	1	D_GDEEGVY01BI9L0_82	-	-		na	4046618-4046827	0.048	0.05	non-adj
	QLWP.adr-2A.1	2A	Leaf water potential	Drought	2017	1	IAAV8167	-	-		86.88	10993123-10993252	0.061	0.05	adj
	QSCRt.adr-2A.1	2A	Screenings per primary tiller	Drought	2016	1	RAC875_c63018_441	-	-		86.88	5783390-5783491	0.051	0.2	adj
	QSWt.ara-2A.1	2A	Seed weight per primary tiller	Ratio	2016	1	Excalibur_c7682_652	-	-		86.88	4950953-4951043	0.062	0.05	non-adj
	QSWt.ara-2A.1	2A	Seed weight per primary tiller	Ratio	2017	1	D_GDEEGVY01BI9L0_82	-	-		na	4046618-4046827	0.063	0.05	non-adj
QTL21	QHI.ara-2A.2	2A	Harvest index	Ratio	2017	2	Kukri_c29492_98	RAC875_c5260_869	Kukri_c29492_98		157.96	25479194-25479455	0.066	0.05	non-adj
	QLWP.adr-2A.2	2A	Leaf water potential	Drought	2017	2	RAC875_c5260_869	RAC875_c5260_869	Kukri_c29492_98		157.96	25479194-25479455	0.117-0.118	0.05	non-adj & adj
	QSWt.ara-2A.2	2A	Seed weight per primary tiller	Ratio	2017	2	Kukri_c29492_98	RAC875_c5260_869	Kukri_c29492_98		157.96	25479194-25479455	0.083	0.05	non-adj
QTL22	QDTA.aco-2A.1	2A	Days to anthesis	Pre-treatment	2017	1	Kukri_c35248_185	-	-	Ppd-A1	na	43445912-43446012	0.032	0.2	non-adj
	QSCRp.adr-2A	2A	Screenings per plant	Drought	2017	1	Kukri_c35248_185	-	-		na	43445912-43446012	0.051	0.2	non-adj
	QSCRt.adr-2A.2	2A	Screenings per primary tiller	Drought	2017	1	Kukri_c35248_185	-	-		na	43445912-43446012	0.05	0.2	non-adj
	QSPL.adr-2A.1	2A	Spike length	Drought	2017	1	Kukri_c35248_185	-	-		na	43445912-43446012	0.048	0.2	adj
QTL23	QHI.ara-2A.3	2A	Harvest index	Ratio	2017	1	BS00064310_51	-	-		na	475549927-475550027	0.036	0.2	non-adj
	QSWt.ara-2A.3	2A	Seed weight per primary tiller	Ratio	2017	1	BS00064310_51	-	-		na	475549927-475550027	0.053	0.05	non-adj
QTL24	QHI.ara-2A.4	2A	Harvest index	Ratio	2017	1	Ku_c15794_1034	-	-		na	607839714-607839815	0.037	0.2	non-adj
	QLWP.adr-2A.3	2A	Leaf water potential	Drought	2017	1	Ku_c15794_1034	-	-		na	607839714-607839815	0.078	0.05	adj
	QSWt.ara-2A.4	2A	Seed weight per primary tiller	Ratio	2017	1	Ku_c15794_1034	-	-		na	607839714-607839815	0.051	0.05	non-adj
	QSPL.adr-2A.2	2A	Spike length	Drought	2017	1	Ku_c15794_1034	-	-		na	607839714-607839815	0.042	0.2	adj
QTL25	QDTA.aco-2A.2	2A	Days to anthesis	Pre-treatment	2017	1	Kukri_c44255_832	-	-		na	701482443-701482543	0.027	0.2	non-adj
	QSWt.ara-2A.5	2A	Seed weight per primary tiller	Ratio	2016	2	Excalibur_c14536_1129	Kukri_c44255_832	Excalibur_c14536_1129		401.22	701482443-705826614	0.060-0.102	0.05	non-adj
	QSSWp.ara-2A.1	2A	Single seed weight per plant	Ratio	2016	1	Excalibur_c14536_1129	-	-		401.22	705826614-705826715	0.087	0.05	non-adj
QTL26	QHI.adh-2A	2A	Harvest index	Drought & heat	2017	1	Excalibur_c24715_276	-	-		467.84	740008872-740008933	0.037	0.2	adj
	QLWP.adr-2A.4	2A	Leaf water potential	Drought	2017	1	GENE-3335_127	-	-		na	748443536-748443628	0.047	0.2	adj
	QSNp.adh-2A	2A	Seed number per plant	Drought & heat	2017	1	Excalibur_c24715_276	-	-		467.84	740008872-740008933	0.04	0.2	adj
QTL27	QSWt.ara-2A.6	2A	Seed weight per primary tiller	Ratio	2016	1	Kukri_c78358_129	-	-		501.34	754451030-754451130	0.048	0.2	non-adj
	QSSWp.ara-2A.2	2A	Single seed weight per plant	Ratio	2016	1	Kukri_c78358_129	-	-		501.34	754451030-754451130	0.061	0.2	non-adj
QTL28	QHI.ara-2A.5	2A	Harvest index	Ratio	2017	2	BS00098033_51	Tdurum_contig10048_207	BS00098033_51		506.7-517.7	777519551-778724137	0.080-0.085	0.05	non-adj
	QSWt.ara-2A.7	2A	Seed weight per primary tiller	Ratio	2017	2	BS00098033_51	Tdurum_contig10048_207	BS00098033_51		506.7-517.7	777519551-778724137	0.110-0.119	0.05	non-adj
QTL29	QHI.ara-2B.1	2B	Harvest index	Ratio	2017	3	BS00049499_51	BS00049499_51	RAC875_c5718_822		64.65	5601480-7909486	0.051-0.065	0.05	non-adj
	QSNp.ara-2B	2B	Seed number per plant	Ratio	2016	1	RAC875_rep_c107312_358	-	-		na	5662753-5662854	0.109	0.05	non-adj
	QSWp.ara-2B	2B	Seed weight per plant	Ratio	2016	1	RAC875_rep_c107312_358	-	-		na	5662753-5662854	0.113	0.05	non-adj
	QSWt.ara-2B.1	2B	Seed weight per primary tiller	Ratio	2017	3	BS00049499_51	BS00049499_51	RAC875_c5718_822		64.65	5601480-7909486	0.065-0.083	0.05	non-adj
QTL30	QHI.ara-2B.2	2B	Harvest index	Ratio	2017	1	Excalibur_c42476_170	-	-		na	38355520-38355620	0.076	0.05	non-adj
	QLWP.adr-2B.1	2B	Leaf water potential	Drought	2017	1	Excalibur_c42476_170	-	-		na	38355520-38355620	0.105	0.05	adj
	QSWt.ara-2B.2	2B	Seed weight per primary tiller	Ratio	2017	1	Excalibur_c42476_170	-	-		na	38355520-38355620	0.095	0.05	non-adj
QTL31	QHI.adr-2B.1	2B	Harvest index	Drought	2016	1	GENE-1364_133	-	-		na	131570147-131570239	0.025	0.2	non-adj
	QPH.adh-2B	2B	Plant height	Drought & heat	2016	1	GENE-1364_133	-	-		na	131570147-131570239	0.03	0.2	adj
QTL32	QLWP.adr-2B.2	2B	Leaf water potential	Drought	2016	3	RAC875_s109189_188	TA001505-1171	RAC875_s109189_188		318.0-319.8	247934066-248149874	0.044-0.047	0.2	non-adj & adj
	QLWP.adh-2B	2B	Leaf water potential	Drought & heat	2016	2	BS00071346_51	BS00071346_51	RAC875_c57938_94		317.99	249198120-249374664	0.051-0.053	0.05	non-adj & adj
	QSWt.ara-2B.3	2B	Seed weight per primary tiller	Ratio	2016	4	Kukri_c27713_131 / Excalibur_c5691_2088	Kukri_c66550_167	Kukri_c6830_572		315.96	217405537-236807129	0.062-0.091	0.05	non-adj
	QSSWp.ara-2B.1	2B	Single seed weight per plant	Ratio	2016	3	Kukri_c66550_167	Kukri_c66550_167	Excalibur_c5691_2088		na	217405537-228981009	0.069-0.073	0.05	non-adj
	QSSWt.ara-2B.1	2B	Single seed weight per primary tiller	Ratio	2016	3	Kukri_c27713_131 / Excalibur_c5691_2088	Kukri_c27713_131	Kukri_c6830_572		315.96	221921251-236807129	0.084-0.112	0.05	non-adj
QTL33	QSCRp.adr-2B.1	2B	Screenings per plant	Drought	2016	1	Tdurum_contig42226_2229	-	-		na	429140420-429140520	0.067	0.05	non-adj
	QSCRt.adr-2B	2B	Screenings per primary tiller	Drought	2016	1	Tdurum_contig42226_2229	-	-		na	429140420-429140520	0.051	0.2	non-adj
	QSWt.ara-2B.4	2B	Seed weight per primary tiller	Ratio	2016	1	Tdurum_contig42226_2229	-	-		na	429140420-429140520	0.16	0.05	non-adj
	QSSWp.ara-2B.2	2B	Single seed weight per plant	Ratio	2016	1	Tdurum_contig42226_2229	-	-		na	429140420-429140520	0.123	0.05	non-adj
	QSSWt.ara-2B.2	2B	Single seed weight per primary tiller	Ratio	2016	1	Tdurum_contig42226_2229	-	-		na	429140420-429140520	0.176	0.05	non-adj
QTL34	QHI.ara-2B.3	2B	Harvest index	Ratio	2017	1	Tdurum_contig56876_1078	-	-		na	726550388-726550458	0.04	0.2	non-adj
	QSWt.ara-2B.5	2B	Seed weight per primary tiller	Ratio	2017	1	Tdurum_contig56876_1078	-	-		na	726550388-726550458	0.054	0.05	non-adj
QTL35	QHI.adr-2B.2	2B	Harvest index	Drought	2016	9	Excalibur_c9752_208	Kukri_c50391_219	BobWhite_c5261_252		431.19	751511192-758596976	0.025-0.028	0.2	non-adj
	QSCRp.adr-2B.2	2B	Screenings per plant	Drought	2016	2	RAC875_rep_c114621_122	IACX2222	RAC875_rep_c114621_122		na	754663576-754663961	0.067-0.070	0.2	adj
QTL36	QHI.ara-2D.1	2D	Harvest index	Ratio	2017	2	D_GB5Y7FA02ILQ9Z_218	RAC875_c1647_1988	D_GB5Y7FA02ILQ9Z_218		na	3781938-5439928	0.059-0.073	0.05	non-adj
	QSWt.ara-2D.1	2D	Seed weight per primary tiller	Ratio	2017	2	D_GB5Y7FA02ILQ9Z_218	RAC875_c1647_1988	D_GB5Y7FA02ILQ9Z_218		na	3781938-5439928	0.081-0.095	0.05	non-adj
QTL37	QLWP.adr-2D.1	2D	Leaf water potential	Drought	2016	1	BS00022224_51	-	-		na	13679272-13679372	0.052	0.05	non-adj & adj
	QLWP.adh-2D.1	2D	Leaf water potential	Drought & heat	2016	1	BS00029721_51	-	-		na	13066905-13067006	0.064	0.05	non-adj & adj
	QLWP.ara-2D	2D	Leaf water potential	Ratio	2016	1	BS00029721_51	-	-		na	13066905-13067006	0.06	0.2	non-adj
	QSWt.ara-2D.2	2D	Seed weight per primary tiller	Ratio	2016	2	GENE-1086_99	Kukri_c30439_2407	GENE-1086_99		16.9-18.1	12329555-12332026	0.048-0.053	0.2	non-adj
	QSSWp.ara-2D.1	2D	Single seed weight per plant	Ratio	2016	2	BS00093760_51	GENE-1086_99	BS00093760_51		18.13	12331925-27924710	0.050-0.055	0.2	non-adj
QTL38	QHI.ara-2D.2	2D	Harvest index	Ratio	2017	6	BS00093760_51	BS00093760_51	GENE-1417_89		49.75	27924710-28627398	0.097-0.146	0.05	non-adj
	QSWt.ara-2D.3	2D	Seed weight per primary tiller	Ratio	2016	1	BS00093760_51	-	-		na	27924710-27924811	0.072	0.05	non-adj
	QSWt.ara-2D.3	2D	Seed weight per primary tiller	Ratio	2017	6	BS00093760_51	BS00093760_51	GENE-1417_89		49.75	27924710-28627398	0.146-0.176	0.05	non-adj
QTL39	QBM.adh-2D	2D	Biomass	Drought & heat	2016	1	wMAS000024	-	-	Ppd-D1	na	33957749-33957796	0.051	0.05	non-adj
	QDTA.aco-2D	2D	Days to anthesis	Pre-treatment	2016	1	wMAS000024	-	-	Ppd-D1	na	33957749-33957796	0.063	0.05	non-adj
	QDTA.aco-2D	2D	Days to anthesis	Pre-treatment	2017	1	wMAS000024	-	-	Ppd-D1	na	33957749-33957796	0.035	0.2	non-adj
	QLWP.adr-2D.2	2D	Leaf water potential	Drought	2016	1	RAC875_c34767_147	-	-		66.56	33884916-33885017	0.038	0.2	non-adj
	QSSWt.ara-2D.1	2D	Single seed weight per primary tiller	Ratio	2016	1	RAC875_c34767_147	-	-		66.56	33884916-33885017	0.057	0.05	non-adj
QTL40	QHI.adr-2D	2D	Harvest index	Drought	2017	31	GENE-1172_825	BS00063970_51	BobWhite_rep_c51612_864		109.7-114.4	73570876-77132727	0.033-0.055	0.2	non-adj & adj
	QSNt.adr-2D	2D	Seed number per primary tiller	Drought	2017	18	GENE-1172_825	Kukri_c60627_74	RAC875_rep_c103893_601		110.6-113.8	74279419-76860598	0.038-0.053	0.2	non-adj
	QSWt.adr-2D	2D	Seed weight per primary tiller	Drought	2017	5	GENE-1172_825	Kukri_c60627_74	Kukri_rep_c71152_906		110.6-113.8	74279419-75393808	0.041-0.047	0.2	non-adj
	QLWP.adh-2D.2	2D	Leaf water potential	Drought & heat	2017	28	GENE-1172_825	BS00063970_51	IAAV6312		109.7-114.4	73570876-78765908	0.041-0.054	0.2	adj
QTL41	QSCRp.adr-2D	2D	Screenings per plant	Drought	2016	1	RAC875_c39909_184	-	-		na	86083109-86083209	0.057	0.2	adj
	QSCRt.adr-2D	2D	Screenings per primary tiller	Drought	2016	1	RAC875_c39909_184	-	-		na	86083109-86083209	0.057	0.2	adj
	QSSWt.ara-2D.2	2D	Single seed weight per primary tiller	Ratio	2016	2	RAC875_c8723_54	RAC875_c39909_184	RAC875_c8723_54		na	86083109-87245113	0.05	0.05	non-adj
QTL42	QLWP.adr-2D.3	2D	Leaf water potential	Drought	2016	1	Kukri_c14902_1112	-	-		133.17	146305492-146305593	0.046	0.2	non-adj & adj
	QSWp.adr-2D	2D	Seed weight per plant	Drought	2016	1	Kukri_c14902_1112	-	-		133.17	146305492-146305593	0.079	0.2	adj
QTL43	QHI.ara-2D.3	2D	Harvest index	Ratio	2017	1	Tdurum_contig56876_449	-	-		205.15	598714660-598714760	0.047	0.05	non-adj
	QSCRt.ara-2D.1	2D	Screenings per primary tiller	Ratio	2016	1	GENE-0638_732	-	-		205.15	593274733-593274814	0.063	0.2	non-adj
	QSSWt.ara-2D.3	2D	Single seed weight per primary tiller	Ratio	2016	2	Kukri_c101063_1234	Kukri_c32355_1027	Kukri_c101063_1234		205.2	592787492-594102613	0.051-0.053	0.05	non-adj
QTL44	QSCRt.ara-2D.2	2D	Screenings per primary tiller	Ratio	2016	1	Excalibur_c9472_217	-	-		277.48	646418434-646418535	0.046	0.2	non-adj
	QSWt.ara-2D.4	2D	Seed weight per primary tiller	Ratio	2017	1	GENE-1119_747	-	-		264.77	650060868-650060966	0.04	0.2	non-adj
	QSSWp.ara-2D.2	2D	Single seed weight per plant	Ratio	2016	1	Tdurum_contig92425_296	-	-		277.48	650750059-650750153	0.046	0.2	non-adj
QTL45	QHI.adr-3A	3A	Harvest index	Drought	2016	1	Kukri_c86406_100	-	-		na	21374531-21374631	0.027	0.2	non-adj
	QSWt.ara-3A.1	3A	Seed weight per primary tiller	Ratio	2016	1	Kukri_c86406_100	-	-		na	21374530-21374631	0.047	0.2	non-adj
QTL46	QHI.ara-3A	3A	Harvest index	Ratio	2017	1	RAC875_rep_c107849_199	-	-		na	128217961-128218061	0.066	0.05	non-adj
	QLWP.adr-3A.1	3A	Leaf water potential	Drought	2017	1	RAC875_rep_c107849_199	-	-		na	128217961-128218061	0.06	0.05	adj
	QSWt.ara-3A.2	3A	Seed weight per primary tiller	Ratio	2017	1	RAC875_rep_c107849_199	-	-		na	128217961-128218061	0.088	0.05	non-adj
QTL47	QSWt.ara-3A.3	3A	Seed weight per primary tiller	Ratio	2016	4	RAC875_c17479_359	RAC875_c17479_359	RAC875_c60753_129		296.36	574508871-576912232	0.070-0.085	0.05	non-adj
	QSSWp.ara-3A.1	3A	Single seed weight per plant	Ratio	2016	4	RAC875_c17479_359	RAC875_c17479_359	RAC875_c60753_129		296.36	574508871-576912232	0.048-0.061	0.2	non-adj
	QSSWt.ara-3A	3A	Single seed weight per primary tiller	Ratio	2016	2	RAC875_c17479_359	RAC875_c17479_359	RAC875_c17479_745		296.36	574508871-574509358	0.064-0.108	0.05	non-adj
QTL48	QHI.adh-3A	3A	Harvest index	Drought & heat	2017	2	wsnp_BF292596A_Ta_1_3 / BobWhite_c71_391	wsnp_BF292596A_Ta_1_3	BobWhite_c71_391		347.9-349.3	647478743-647508573	0.038	0.2	adj
	QLWP.adr-3A.2	3A	Leaf water potential	Drought	2017	4	wsnp_BF292596A_Ta_1_3 / BobWhite_c71_391	Excalibur_c39002_242	BobWhite_c71_391		347.9-349.3	647474241-647508573	0.069-0.097	0.05	adj
	QSNp.adh-3A	3A	Seed number per plant	Drought & heat	2017	2	wsnp_BF292596A_Ta_1_3 / BobWhite_c71_391	wsnp_BF292596A_Ta_1_3	BobWhite_c71_391		347.9-349.3	647478743-647508573	0.04	0.2	adj
	QSWp.adh-3A	3A	Seed weight per plant	Drought & heat	2017	2	wsnp_BF292596A_Ta_1_3 / BobWhite_c71_391	wsnp_BF292596A_Ta_1_3	BobWhite_c71_391		347.9-349.3	647478743-647508573	0.039	0.2	adj
	QSWt.adh-3A	3A	Seed weight per primary tiller	Drought & heat	2017	2	wsnp_BF292596A_Ta_1_3 / BobWhite_c71_391	wsnp_BF292596A_Ta_1_3	BobWhite_c71_391		347.9-349.3	647478743-647508573	0.04	0.2	adj
QTL49	QSCRp.adr-3A	3A	Screenings per plant	Drought	2016	1	RAC875_c36987_1045	-	-		365.87	662083645-662083746	0.041	0.2	non-adj
	QSWt.ara-3A.4	3A	Seed weight per primary tiller	Ratio	2016	3	BS00081688_51	BS00081688_51	Excalibur_c17655_467		362.67	659040055-659528692	0.047-0.050	0.2	non-adj
	QSSWp.ara-3A.2	3A	Single seed weight per plant	Ratio	2016	2	GENE-1981_131	BS00081688_51	GENE-1981_131		362.67	659040055-659162409	0.047	0.2	non-adj
QTL50	QSWt.ara-3B.1	3B	Seed weight per primary tiller	Ratio	2016	1	TA004185-0427	-	-		na	3238175-3238228	0.045	0.2	non-adj
	QSSWp.ara-3B	3B	Single seed weight per plant	Ratio	2016	1	TA004185-0427	-	-		na	3238175-3238228	0.05	0.2	non-adj
	QSSWt.ara-3B.1	3B	Single seed weight per primary tiller	Ratio	2016	1	TA004185-0427	-	-		na	3238175-3238228	0.054	0.05	non-adj
	QSPL.adr-3B	3B	Spike length	Drought	2017	1	Tdurum_contig44159_245	-	-		na	3307244-3307345	0.064	0.05	non-adj & adj
QTL51	QHI.adh-3B.1	3B	Harvest index	Drought & heat	2017	1	wsnp_Ex_c3005_5548573	-	-		56.41	14985191-14985392	0.037	0.2	adj
	QSWp.adh-3B.1	3B	Seed weight per plant	Drought & heat	2017	1	wsnp_Ex_c3005_5548573	-	-		56.41	14985191-14985392	0.037	0.2	adj
QTL52	QSCRp.adr-3B.1	3B	Screenings per plant	Drought	2017	2	Tdurum_contig46389_760	Tdurum_contig46389_1838	Tdurum_contig46389_760		na	29355767-29356945	0.035-0.041	0.2	non-adj
	QHI.adh-3B.2	3B	Harvest index	Drought & heat	2017	1	Ku_c663_1896	-	-		119.83	26650089-26650171	0.038	0.2	adj
	QSWp.adh-3B.2	3B	Seed weight per plant	Drought & heat	2017	1	Ku_c663_1896	-	-		119.83	26650089-26650171	0.038	0.2	adj
	QSWt.ara-3B.2	3B	Seed weight per primary tiller	Ratio	2017	2	Tdurum_contig46389_1838	Tdurum_contig46389_1838	Tdurum_contig46389_760		na	29355767-29356945	0.037-0.038	0.2	non-adj
QTL53	QHI.ara-3B.1	3B	Harvest index	Ratio	2017	1	RAC875_c37084_143	-	-		na	44283482-44283582	0.084	0.05	non-adj
	QLWP.adr-3B.1	3B	Leaf water potential	Drought	2016	1	RAC875_c37084_143	-	-		na	44283482-44283582	0.063	0.05	non-adj & adj
	QLWP.adh-3B	3B	Leaf water potential	Drought & heat	2016	1	RAC875_c37084_143	-	-		na	44283482-44283582	0.049	0.05	non-adj & adj
	QSPN.ara-3B	3B	Number of spikes per plant	Ratio	2017	1	RAC875_c37084_143	-	-		na	44283482-44283582	0.054	0.2	non-adj
	QSWt.ara-3B.3	3B	Seed weight per primary tiller	Ratio	2017	1	RAC875_c37084_143	-	-		na	44283482-44283582	0.092	0.05	non-adj
QTL54	QHI.ara-3B.2	3B	Harvest index	Ratio	2017	2	BS00066883_51	BS00028532_51	BS00066883_51		na	145368177-145502817	0.035-0.036	0.2	non-adj
	QSWt.ara-3B.4	3B	Seed weight per primary tiller	Ratio	2017	4	CAP8_s9973_290	CAP8_s9973_290	BS00066883_51		250.63	144057160-145502817	0.051-0.058	0.05	non-adj
QTL55	QHI.ara-3B.3	3B	Harvest index	Ratio	2017	1	wsnp_Ra_c10561_17352558	-	-		na	183998743-183998868	0.037	0.2	non-adj
	QSWt.ara-3B.5	3B	Seed weight per primary tiller	Ratio	2017	1	wsnp_Ra_c10561_17352558	-	-		na	183998743-183998868	0.043	0.05	non-adj
QTL56	QHI.ara-3B.4	3B	Harvest index	Ratio	2017	1	RAC875_c4828_417	-	-		na	250806729-250806829	0.057	0.05	non-adj
	QSWt.ara-3B.6	3B	Seed weight per primary tiller	Ratio	2017	1	RAC875_c4828_417	-	-		na	250806729-250806829	0.078	0.05	non-adj
QTL57	QHI.ara-3B.5	3B	Harvest index	Ratio	2017	2	TA002920-0166-w	Kukri_c15639_351	TA002920-0166-w		na	482995802-485693979	0.135	0.05	non-adj
	QLWP.adr-3B.2	3B	Leaf water potential	Drought	2017	3	Kukri_c15639_351 / TA002920-0166-w	Kukri_c4074_463	TA002920-0166-w		270.64	473237497-485693979	0.038-0.045	0.2	adj
	QSWt.ara-3B.7	3B	Seed weight per primary tiller	Ratio	2017	2	TA002920-0166-w	Kukri_c15639_351	TA002920-0166-w		na	482995802-485693979	0.165	0.05	non-adj
QTL58	QBM.adh-3B	3B	Biomass	Drought & heat	2016	1	BS00093886_51	-	-		na	520330337-520330438	0.024	0.2	adj
	QHI.adr-3B	3B	Harvest index	Drought	2016	1	BS00022219_51	-	-		na	513987343-513987444	0.026	0.2	non-adj
	QLWP.adr-3B.3	3B	Leaf water potential	Drought	2017	2	BS00093886_51	BS00022219_51	BS00093886_51		na	513987343-520330438	0.075-0.080	0.05	non-adj & adj
QTL59	QSWt.ara-3B.8	3B	Seed weight per primary tiller	Ratio	2017	1	wsnp_RFL_Contig3599_3786631	-	-		322.98	725708162-725708249	0.051	0.05	non-adj
	QSSWt.ara-3B.2	3B	Single seed weight per primary tiller	Ratio	2016	1	tplb0040h06_1187	-	-		320.47	722360895-722360996	0.05	0.05	non-adj
QTL60	QHI.ara-3B.6	3B	Harvest index	Ratio	2017	1	CAP7_c3746_137	-	-		na	750361316-750361416	0.064	0.05	non-adj
	QSCRp.adr-3B.2	3B	Screenings per plant	Drought	2016	1	Excalibur_c21708_324	-	-		389.34	756708518-756708619	0.059	0.2	non-adj & adj
	QSCRt.adr-3B	3B	Screenings per primary tiller	Drought	2016	1	Excalibur_c21708_324	-	-		389.34	756708518-756708619	0.067	0.05	non-adj & adj
	QSWt.ara-3B.9	3B	Seed weight per primary tiller	Ratio	2017	1	CAP7_c3746_137	-	-		na	750361316-750361416	0.08	0.05	non-adj
QTL61	QHI.ara-3B.7	3B	Harvest index	Ratio	2017	1	BobWhite_c37848_151	-	-		na	806189585-806189685	0.059	0.05	non-adj
	QSWt.ara-3B.10	3B	Seed weight per primary tiller	Ratio	2017	1	BobWhite_c37848_151	-	-		na	806189585-806189685	0.072	0.05	non-adj
QTL62	QSWt.ara-3B.11	3B	Seed weight per primary tiller	Ratio	2016	1	tplb0048c20_2437	-	-		na	821082243-821082343	0.061	0.05	non-adj
	QSSWt.ara-3B.3	3B	Single seed weight per primary tiller	Ratio	2016	2	tplb0048c20_2437	tplb0048c20_2437	BS00009671_51		617.82	821082243-821089318	0.091-0.094	0.05	non-adj
QTL63	QHI.ara-3D.1	3D	Harvest index	Ratio	2017	1	RFL_Contig3008_1342	-	-		na	1768768-1768845	0.041	0.2	non-adj
	QLWP.adr-3D	3D	Leaf water potential	Drought	2016	1	BobWhite_c43495_133	-	-		na	1698974-1698999	0.081	0.05	non-adj & adj
	QSNt.ara-3D	3D	Seed number per primary tiller	Ratio	2017		RAC875_c4954_331	-	-		na	4394498-4394598	0.078	0.05	non-adj
	QSWt.ara-3D.1	3D	Seed weight per primary tiller	Ratio	2016	2	RFL_Contig3008_1342	RFL_Contig3008_1342	BS00021849_51		na	1768845-3298789	0.061-0.090	0.05	non-adj
	QSWt.ara-3D.1	3D	Seed weight per primary tiller	Ratio	2017	1	RFL_Contig3008_1342	-	-		na	1768768-1768845	0.052	0.05	non-adj
	QSSWp.ara-3D.1	3D	Single seed weight per plant	Ratio	2016	1	RFL_Contig3008_1342	-	-		na	1768845-1768946	0.107	0.05	non-adj
QTL64	QHI.ara-3D.2	3D	Harvest index	Ratio	2017	1	GENE-2052_186	-	-		na	370111378-370111459	0.046	0.2	non-adj
	QSWt.ara-3D.2	3D	Seed weight per primary tiller	Ratio	2017	1	GENE-2052_186	-	-		na	370111378-370111459	0.064	0.05	non-adj
QTL65	QSWt.ara-3D.3	3D	Seed weight per primary tiller	Ratio	2016	3	BS00065708_51	Ku_c8581_1784	BS00065708_51		431.16	607873321-609626744	0.045-0.048	0.2	non-adj
	QSSWp.ara-3D.2	3D	Single seed weight per plant	Ratio	2016	1	Ra_c10378_1677	-	-		431.16	608067777-608067850	0.053	0.2	non-adj
QTL66	QBM.adh-4A	4A	Biomass	Drought & heat	2016	1	Kukri_c53787_620	-	-		na	21212623-21212723	0.032	0.2	non-adj
	QHI.ara-4A.1	4A	Harvest index	Ratio	2017	3	Kukri_rep_c101034_516	IAAV8202	Kukri_rep_c101034_516		na	21063714-21064303	0.056-0.071	0.05	non-adj
	QLWP.adr-4A.1	4A	Leaf water potential	Drought	2016	4	IAAV8202 / Kukri_rep_c101034_516	IAAV8202	IACX3391		na	21063714-21635963	0.100-0.111	0.05	non-adj & adj
	QSCRt.adr-4A	4A	Screenings per primary tiller	Drought	2016	3	Kukri_rep_c101034_516	IAAV8202	Kukri_rep_c101034_516		na	21063714-21063915	0.071-0.078	0.05	non-adj & adj
	QSWp.ara-4A	4A	Seed weight per plant	Ratio	2017	3	Kukri_rep_c101034_516	IAAV8202	Kukri_rep_c101034_516		na	21063714-21064303	0.074-0.091	0.05	non-adj
	QSWt.ara-4A.1	4A	Seed weight per primary tiller	Ratio	2017	4	Kukri_rep_c101034_516	IAAV8202	IACX3391		na	21063714-21635963	0.044-0.078	0.05	non-adj
QTL67	QHI.ara-4A.2	4A	Harvest index	Ratio	2017	1	Excalibur_rep_c115683_208	-	-		na	293293031-293293131	0.039	0.2	non-adj
	QSWt.ara-4A.2	4A	Seed weight per primary tiller	Ratio	2017	1	Excalibur_rep_c115683_208	-	-		na	293293031-293293131	0.047	0.05	non-adj
QTL68	QHI.ara-4A.3	4A	Harvest index	Ratio	2017	2	RAC875_c21863_233	Excalibur_c31484_124	RAC875_c21863_233		195.45	541782377-542263460	0.099-0.103	0.05	non-adj
	QSWt.ara-4A.3	4A	Seed weight per primary tiller	Ratio	2017	2	RAC875_c21863_233	Excalibur_c31484_124	RAC875_c21863_233		195.45	541782377-542263460	0.121-0.140	0.05	non-adj
QTL69	QHI.ara-4A.4	4A	Harvest index	Ratio	2017	1	CAP11_c614_25	-	-		na	581871201-581871274	0.19	0.05	non-adj
	QSWt.ara-4A.4	4A	Seed weight per primary tiller	Ratio	2017	1	CAP11_c614_25	-	-		na	581871201-581871274	0.211	0.05	non-adj
	QSSWp.ara-4A	4A	Single seed weight per plant	Ratio	2016	2	Excalibur_c38910_490	Excalibur_c38910_490	BS00010925_51		202.2-203.3	578543000-584820140	0.048-0.051	0.2	non-adj
QTL70	QBM.ara-4A	4A	Biomass	Ratio	2017	3	wsnp_RFL_Contig3138_3094305	wsnp_RFL_Contig3138_3094305	BS00107766_51		242.13	599490044-599846444	0.048-0.050	0.2	non-adj
	QHI.adr-4A	4A	Harvest index	Drought	2017	1	BS00107097_51	-	-		242.13	599844613-599844714	0.039	0.2	non-adj & adj
	QHI.ara-4A.5	4A	Harvest index	Ratio	2017	2	Excalibur_c8658_1144	RFL_Contig4609_315	Excalibur_c8658_1144		na	608603800-608834471	0.12	0.05	non-adj
	QLWP.adr-4A.2	4A	Leaf water potential	Drought	2017	3	Excalibur_c58393_329	Excalibur_c58393_329	BS00107766_51		242.13	599345671-599846444	0.052-0.060	0.05	non-adj
	QSWt.ara-4A.5	4A	Seed weight per primary tiller	Ratio	2017	3	RFL_Contig4609_315	BS00002054_51	Excalibur_c8658_1144		242.13	600899074-608834471	0.053-0.143	0.05	non-adj
QTL71	QDTA.aco-4A	4A	Days to anthesis	Pre-treatment	2017	1	Kukri_c1056_1786	-	-		na	714193143-714193243	0.029	0.2	non-adj
	QHI.ara-4A.6	4A	Harvest index	Ratio	2017	3	Kukri_c1056_1786	Kukri_c1056_1786	BS00079091_51		584.78	714193143-732772209	0.047-0.078	0.05	non-adj
	QLWP.adr-4A.3	4A	Leaf water potential	Drought	2017	1	Kukri_c1056_1786	-	-		na	714193143-714193243	0.051	0.2	adj
	QSWt.ara-4A.6	4A	Seed weight per primary tiller	Ratio	2017	1	Kukri_c1056_1786	-	-		na	714193143-714193243	0.1	0.05	non-adj
QTL72	QLWP.adr-4B.1	4B	Leaf water potential	Drought	2017	1	wsnp_Ex_c17561_26284882	-	-		75.86	6541151-6541297	0.056	0.05	adj
	QSWt.ara-4B.1	4B	Seed weight per primary tiller	Ratio	2017	1	wsnp_Ex_c17561_26284882	-	-		75.86	6541151-6541297	0.073	0.05	non-adj
QTL73	QBM.adr-4B	4B	Biomass	Drought	2016	1	wMAS000001	-	-	Rht-B1	na	30861518-30861590	0.034	0.2	adj
	QLWP.adr-4B.2	4B	Leaf water potential	Drought	2017	1	Tdurum_contig100003_292	-	-		163.94	32806992-32807093	0.038	0.2	adj
	QPH.adr-4B	4B	Plant height	Drought	2016	1	wMAS000001	-	-	Rht-B1	na	30861518-30861590	0.069	0.05	adj
	QPH.adh-4B	4B	Plant height	Drought & heat	2016	1	wMAS000001	-	-	Rht-B1	na	30861518-30861590	0.033	0.2	adj
	QPH.adh-4B	4B	Plant height	Drought & heat	2017	1	wMAS000001	-	-	Rht-B1	na	30861518-30861590	0.038	0.05	non-adj & adj
QTL74	QHI.ara-4B.1	4B	Harvest index	Ratio	2017	1	Ex_c4389_155	-	-		na	128945757-128945820	0.115	0.05	non-adj
	QLWP.adr-4B.3	4B	Leaf water potential	Drought	2017	1	Ex_c4389_155	-	-		na	128945757-128945820	0.084	0.05	non-adj & adj
	QSWt.ara-4B.2	4B	Seed weight per primary tiller	Ratio	2017	1	Ex_c4389_155	-	-		na	128945757-128945820	0.122	0.05	non-adj
QTL75	QHI.ara-4B.2	4B	Harvest index	Ratio	2017	1	Tdurum_contig25780_379	-	-		182.55	223396855-223396956	0.043	0.2	non-adj
	QSWt.ara-4B.3	4B	Seed weight per primary tiller	Ratio	2017	1	Tdurum_contig25780_379	-	-		182.55	223396855-223396956	0.052	0.05	non-adj
QTL76	QLWP.adr-4B.4	4B	Leaf water potential	Drought	2017	2	Jagger_c6334_114	BS00037020_51	Jagger_c6334_114		215.5-220.7	595271088-609474540	0.055-0.057	0.05	adj
	QSWt.ara-4B.4	4B	Seed weight per primary tiller	Ratio	2016	2	BS00012457_51	BS00012457_51	BS00037020_51		215.5-220.7	586584257-595271189	0.048-0.057	0.2	non-adj
	QSWt.ara-4B.4	4B	Seed weight per primary tiller	Ratio	2017	1	Jagger_c6334_114	-	-		220.72	609474439-609474540	0.039	0.2	non-adj
	QSSWp.ara-4B	4B	Single seed weight per plant	Ratio	2016	1	BS00012457_51	-	-		220.72	586584257-586584340	0.047	0.2	non-adj
QTL77	QHI.ara-4B.3	4B	Harvest index	Ratio	2017	2	Excalibur_c17547_646	Excalibur_c17547_646	RAC875_c66141_332		229.2-232.7	621819722-625336470	0.063-0.081	0.05	non-adj
	QSWt.ara-4B.5	4B	Seed weight per primary tiller	Ratio	2017	2	Excalibur_c17547_646	Excalibur_c17547_646	RAC875_c66141_332		229.2-232.7	621819722-625336470	0.076-0.107	0.05	non-adj
QTL78	QLWP.adr-4B.5	4B	Leaf water potential	Drought	2017	1	D_contig31657_421	-	-		na	644681219-644681403	0.057	0.05	adj
	QSWt.ara-4B.6	4B	Seed weight per primary tiller	Ratio	2017	2	D_contig04891_967	D_contig31657_421	D_contig04891_967		na	644681219-646117476	0.045-0.053	0.05	non-adj
QTL79	QPH.adr-4D	4D	Plant height	Drought	2016	2	wMAS000002	Kukri_rep_c68594_530	wMAS000002	Rht-D1	92.75	12773158-18781262	0.064	0.05	non-adj & adj
	QPH.adh-4D	4D	Plant height	Drought & heat	2016	2	wMAS000002	Kukri_rep_c68594_530	wMAS000002	Rht-D1	92.75	12773158-18781262	0.087	0.05	non-adj & adj
	QPH.adr-4D	4D	Plant height	Drought	2017	1	wMAS000002	-	-	Rht-D1	na	18781193-18781262	0.035	0.2	non-adj
	QPH.adh-4D	4D	Plant height	Drought & heat	2017	1	wMAS000002	-	-	Rht-D1		18781193-18781262	0.044	0.05	non-adj & adj
QTL80	QSCRp.adr-4D	4D	Screenings per plant	Drought	2017	1	Kukri_rep_c72749_126	-	-		na	148697496-148697596	0.045	0.2	non-adj
	QSWp.ara-4D	4D	Seed weight per plant	Ratio	2017	1	Kukri_rep_c72749_126	-	-		na	148697496-148697596	0.116	0.05	non-adj
QTL81	QHI.ara-4D.1	4D	Harvest index	Ratio	2017	2	Excalibur_c13105_626	wsnp_RFL_Contig3792_4086706	Excalibur_c13105_626		152.02	409639683-419310981	0.058-0.081	0.05	non-adj
	QSWt.ara-4D.1	4D	Seed weight per primary tiller	Ratio	2017	2	Excalibur_c13105_626	wsnp_RFL_Contig3792_4086706	Excalibur_c13105_626		152.02	409639683-419310981	0.082-0.112	0.05	non-adj
QTL82	QHI.ara-4D.2	4D	Harvest index	Ratio	2017	1	Excalibur_c38704_1357	-	-		na	503621361-503621461	0.041	0.2	non-adj
	QSWt.ara-4D.2	4D	Seed weight per primary tiller	Ratio	2017	1	Excalibur_c38704_1357	-	-		na	503621361-503621461	0.046	0.05	non-adj
QTL83	QBM.ara-5A.1	5A	Biomass	Ratio	2017	1	RFL_Contig3340_1452	-	-		78.15	48920124-48920222	0.056	0.2	non-adj
	QSPN.ara-5A	5A	Number of spikes per plant	Ratio	2017	1	RFL_Contig3340_1452	-	-		78.15	48920124-48920222	0.063	0.2	non-adj
QTL84	QDTA.aco-5A.1	5A	Days to anthesis	Pre-treatment	2017	3	BobWhite_c33909_119	BobWhite_c33909_119	RAC875_c63732_246		69.6-78.2	195629428-197210547	0.050-0.051	0.05	non-adj
	QSPN.adh-5A	5A	Number of spikes per plant	Drought	2017	1	Kukri_rep_c103997_238	-	-		69.57	195630289-195630357	0.043	0.2	adj
	QPH.adh-5A	5A	Plant height	Drought & heat	2016	2	BobWhite_c33909_119	BobWhite_c33909_119	Kukri_rep_c103997_238		69.6-78.2	195629428-195630357	0.037	0.2	non-adj & adj
	QSWp.adh-5A.1	5A	Seed weight per plant	Drought & heat	2017	1	Kukri_rep_c103997_238	-	-		69.57	195630289-195630357	0.034	0.2	adj
	QSWp.ara-5A	5A	Seed weight per plant	Ratio	2016	1	RAC875_c63732_246	-	-		na	197210547-197210648	0.062	0.2	non-adj
QTL85	QBM.adr-5A.1	5A	Biomass	Drought	2016	1	RFL_Contig3290_726	-	-		na	344535892-344535993	0.046	0.05	non-adj & adj
	QBM.adh-5A.1	5A	Biomass	Drought & heat	2016	1	RFL_Contig3290_726	-	-		na	344535892-344535993	0.043	0.05	non-adj & adj
	QLWP.adr-5A.1	5A	Leaf water potential	Drought	2016	1	RFL_Contig3290_726	-	-		na	344535892-344535993	0.041	0.2	adj
QTL86	QSCRt.ara-5A.1	5A	Screenings per primary tiller	Ratio	2016	1	BS00058591_51	-	-		na	459003097-459003197	0.046	0.2	non-adj
	QSSWp.ara-5A	5A	Single seed weight per plant	Ratio	2016	2	BS00076190_51	BS00076190_51	wsnp_Ex_rep_c67292_65834396		253.32	456059001-456608287	0.046-0.048	0.2	non-adj
QTL87	QHI.adr-5A	5A	Harvest index	Drought	2017	2	BS00073564_51	BS00065788_51	BS00073564_51		267.69	469064342-470041344	0.040-0.051	0.2	adj
	QLWP.adr-5A.2	5A	Leaf water potential	Drought	2016	1	RAC875_c1901_355	-	-		267.69	469898981-469899082	0.097	0.05	non-adj & adj
	QLWP.adr-5A.2	5A	Leaf water potential	Drought	2017	1	BS00073564_51	-	-		267.69	470041246-470041344	0.059	0.05	non-adj & adj
	QSCRt.ara-5A.2	5A	Screenings per primary tiller	Ratio	2016	1	Kukri_c15618_1785	-	-		267.69	476658178-476658279	0.051	0.2	non-adj
QTL88	QBM.ara-5A.2	5A	Biomass	Ratio	2017	14	wsnp_Ex_c7729_13177883	Kukri_c10033_724	wsnp_AJ612027A_Ta_2_1		450.4-457.1	584677742-588550339	0.047-0.059	0.2	non-adj
	QDTA.aco-5A.2	5A	Days to anthesis	Pre-treatment	2017	13	wsnp_Ex_c7729_13177883	Excalibur_rep_c111129_125	wsnp_Ex_rep_c66689_65010988	Vrn-A1	450.4-457.1	584574826-585609340	0.027-0.039	0.2	non-adj
	QHI.adh-5A	5A	Harvest index	Drought & heat	2017	18	wsnp_Ex_c7729_13177883	Kukri_c10033_724	wsnp_AJ612027A_Ta_2_1		450.4-457.1	584677742-588550339	0.039-0.049	0.2	adj
	QSCRt.adr-5A.1	5A	Screenings per primary tiller	Drought	2016	13	Kukri_c10033_724	BS00071402_51	wsnp_AJ612027A_Ta_2_1		450.4-457.1	580796377-588550339	0.051-0.065	0.2	adj
	QSNp.adh-5A	5A	Seed number per plant	Drought & heat	2017	16	wsnp_Ex_c7729_13177883	Kukri_c10033_724	wsnp_AJ612027A_Ta_2_1		450.4-457.1	584677742-588550339	0.039-0.048	0.2	adj
	QSWp.adh-5A.2	5A	Seed weight per plant	Drought & heat	2017	17	wsnp_Ex_c7729_13177883	Kukri_c10033_724	wsnp_AJ612027A_Ta_2_1		450.4-457.1	584677742-588550339	0.041-0.052	0.05	adj
	QSWt.adh-5A	5A	Seed weight per primary tiller	Drought & heat	2017	4	wsnp_Ex_c7729_13177883	RAC875_rep_c113313_607	IACX9410		450.4	585240547-585409385	0.040-0.042	0.2	adj
QTL89	QHI.ara-5A.1	5A	Harvest index	Ratio	2017	1	CAP11_c1685_325	-	-		na	607834898-607834999	0.099	0.05	non-adj
	QLWP.adr-5A.3	5A	Leaf water potential	Drought	2017	1	CAP11_c1685_325	-	-		na	607834898-607834999	0.076	0.05	adj
	QSCRp.adr-5A.1	5A	Screenings per plant	Drought	2017	1	BobWhite_c17445_83	-	-		484.57	598666254-598666347	0.039	0.2	non-adj
	QSCRt.adr-5A.2	5A	Screenings per primary tiller	Drought	2017	1	BobWhite_c17445_83	-	-		484.57	598666254-598666347	0.054	0.2	non-adj
	QSWt.ara-5A.1	5A	Seed weight per primary tiller	Ratio	2017	1	CAP11_c1685_325	-	-		na	607834898-607834999	0.122	0.05	non-adj
QTL90	QHI.ara-5A.2	5A	Harvest index	Ratio	2017	3	Kukri_c20412_302	Kukri_c20412_302	Kukri_c49033_52		602.4-603.0	675529411-676600654	0.039-0.045	0.2	non-adj
	QSWt.ara-5A.2	5A	Seed weight per primary tiller	Ratio	2017	4	Kukri_c20412_302	Kukri_c20412_302	Excalibur_c37874_281		602.4-603.0	675529411-682933303	0.051-0.061	0.05	non-adj
QTL91	QBM.adr-5A.2	5A	Biomass	Drought	2016	1	wsnp_Ex_c2505_4679749	-	-		658.02	688318159-688318360	0.04	0.05	adj
	QBM.adh-5A.2	5A	Biomass	Drought & heat	2016	1	wsnp_Ex_c2505_4679749	-	-		658.02	688318159-688318360	0.029	0.2	adj
QTL92	QHI.ara-5A.3	5A	Harvest index	Ratio	2017	3	Tdurum_contig82476_65	Tdurum_contig82476_64	RAC875_c8121_1490		709.71	698636653-698782692	0.047-0.073	0.05	non-adj
	QSCRp.adr-5A.2	5A	Screenings per plant	Drought	2017	1	Tdurum_contig12204_1131	-	-		na	705442972-705443072	0.035	0.2	non-adj
	QSWt.ara-5A.3	5A	Seed weight per primary tiller	Ratio	2017	5	Tdurum_contig82476_65	Tdurum_contig82476_64	Excalibur_c79156_129		709.71	698636653-700441490	0.043-0.084	0.05	non-adj
QTL93	QLWP.adr-5B.1	5B	Leaf water potential	Drought	2017	1	BS00025784_51	-	-		na	14508994-14509080	0.068	0.05	adj
	QSCRt.ara-5B	5B	Screenings per primary tiller	Ratio	2016	7	wsnp_JD_c1845_2564931 / Tdurum_contig44048_276	Excalibur_rep_c102143_58	Tdurum_contig44048_276		36.4-48.6	12573395-13428217	0.041-0.044	0.2	non-adj
	QSSWt.ara-5B.1	5B	Single seed weight per primary tiller	Ratio	2016	1	Excalibur_c74858_243	-	-		45.31	13190662-13190760	0.05	0.05	non-adj
QTL94	QHI.ara-5B.1	5B	Harvest index	Ratio	2017	1	BS00106043_51	-	-		na	27459998-27460098	0.046	0.2	non-adj
	QSCRp.adr-5B.1	5B	Screenings per plant	Drought	2016	2	BS00022107_51	BS00022602_51	BS00022107_51		na	34253002-34719464	0.052-0.056	0.05	non-adj
	QSCRt.adr-5B.1	5B	Screenings per primary tiller	Drought	2016	2	BS00022107_51	BS00022602_51	BS00022107_51		na	34253002-34719464	0.048-0.050	0.2	non-adj
	QSWt.ara-5B.1	5B	Seed weight per primary tiller	Ratio	2017	1	BS00106043_51	-	-		na	27459998-27460098	0.041	0.2	non-adj
QTL95	QHI.ara-5B.2	5B	Harvest index	Ratio	2017	1	Tdurum_contig42156_1469	-	-		na	55340339-55340439	0.047	0.05	non-adj
	QSWt.ara-5B.2	5B	Seed weight per primary tiller	Ratio	2017	1	Tdurum_contig42156_1469	-	-		na	55340339-55340439	0.065	0.05	non-adj
QTL96	QHI.adr-5B	5B	Harvest index	Drought	2017	1	BS00048572_51	-	-		145.97	397435099-397435200	0.035	0.2	adj
	QHI.ara-5B.3	5B	Harvest index	Ratio	2017	1	RAC875_c15782_375	-	-		na	401073519-401073619	0.087	0.05	non-adj
	QSNt.adr-5B	5B	Seed number per primary tiller	Drought	2017	1	BS00048572_51	-	-		145.97	397435099-397435200	0.039	0.2	non-adj
	QSWt.ara-5B.3	5B	Seed weight per primary tiller	Ratio	2017	1	RAC875_c15782_375	-	-		na	401073519-401073619	0.105	0.05	non-adj
QTL97	QHI.ara-5B.4	5B	Harvest index	Ratio	2017	2	Tdurum_contig10911_117	Tdurum_contig10911_155	Tdurum_contig10911_117		180.93	461137556-461137695	0.036-0.039	0.2	non-adj
	QLWP.adr-5B.2	5B	Leaf water potential	Drought	2017	1	RAC875_c929_170	-	-		179.66	462145416-462145515	0.054	0.05	adj
	QSWt.ara-5B.4	5B	Seed weight per primary tiller	Ratio	2017	2	Tdurum_contig10911_117	Tdurum_contig10911_155	Tdurum_contig10911_117		180.93	461137556-461137695	0.046-0.049	0.05	non-adj
	QSSWp.ara-5B.1	5B	Single seed weight per plant	Ratio	2016	2	RFL_Contig4751_1197	Excalibur_c24043_347	RFL_Contig4751_1197		na	469827594-482291147	0.049-0.051	0.2	non-adj
	QSSWt.ara-5B.2	5B	Single seed weight per primary tiller	Ratio	2016	2	RFL_Contig4751_1197	BobWhite_c5897_607	RFL_Contig4751_1197		na	473661957-482291147	0.056-0.057	0.05	non-adj
QTL98	QLWP.adr-5B.3	5B	Leaf water potential	Drought	2016	1	IACX5939	-	-		na	507705992-507706071	0.053	0.2	non-adj & adj
	QSWt.ara-5B.5	5B	Seed weight per primary tiller	Ratio	2016	2	IACX5939	IACX5939	RAC875_c1565_1098		na	507705992-543620746	0.076-0.095	0.05	non-adj
	QSSWp.ara-5B.2	5B	Single seed weight per plant	Ratio	2016	1	IACX5939	-	-		na	507705992-507706071	0.085	0.05	non-adj
QTL99	QLWP.adr-5B.4	5B	Leaf water potential	Drought	2016	3	Kukri_c43911_444	IACX7649	Kukri_c43911_444		247.28	539294842-559072690	0.041-0.045	0.2	adj
	QLWP.adh-5B.1	5B	Leaf water potential	Drought & heat	2016	2	Kukri_c52_1639	Kukri_rep_c98079_222	Kukri_c52_1639		242.8-247.3	539296240-539296494	0.038-0.043	0.2	non-adj & adj
	QSWt.ara-5B.6	5B	Seed weight per primary tiller	Ratio	2017	5	Kukri_c52_298	Kukri_c52_298	Kukri_c43911_444		242.8-247.3	539293279-559072690	0.036-0.037	0.2	non-adj
	QSSWp.ara-5B.3	5B	Single seed weight per plant	Ratio	2016	1	RAC875_c1565_1098	-	-		na	543620646-543620746	0.053	0.2	non-adj
	QSSWt.ara-5B.3	5B	Single seed weight per primary tiller	Ratio	2016	1	RAC875_c1565_1098	-	-		na	543620646-543620746	0.066	0.05	non-adj
QTL100	QLWP.adh-5B.2	5B	Leaf water potential	Drought & heat	2016	1	BS00022574_51	-	-		na	589123254-589123355	0.038	0.2	non-adj & adj
	QLWP.adr-5B.5	5B	Leaf water potential	Drought	2016	1	Excalibur_c4189_124	-	-		364.54	589373335-589373407	0.039	0.2	non-adj
QTL101	QHI.ara-5B.5	5B	Harvest index	Ratio	2017	1	RAC875_c2749_197	-	-		401.49	623585388-623585489	0.054	0.05	non-adj
	QLWP.adr-5B.6	5B	Leaf water potential	Drought	2017	2	RAC875_c2749_197	RAC875_c2749_197	Excalibur_rep_c109573_169		401.5-403.3	623585388-629283421	0.078-0.104	0.05	adj
	QSWp.adh-5B	5B	Seed weight per plant	Drought & heat	2017	1	RAC875_c2749_197	-	-		401.49	623585388-623585489	0.035	0.2	adj
	QSWt.ara-5B.7	5B	Seed weight per primary tiller	Ratio	2017	4	RAC875_c2749_197	BobWhite_c6017_1147	RAC875_c2749_197		401.49	622066480-623585489	0.043-0.073	0.05	non-adj
QTL102	QLWP.adr-5B.7	5B	Leaf water potential	Drought	2016	1	RFL_Contig1775_844	-	-		na	658813087-658813188	0.062	0.05	non-adj & adj
	QSCRp.adr-5B.2	5B	Screenings per plant	Drought	2016	1	RFL_Contig1775_844	-	-		na	658813087-658813188	0.111	0.05	non-adj & adj
	QSCRt.adr-5B.2	5B	Screenings per primary tiller	Drought	2016	1	RFL_Contig1775_844	-	-		na	658813087-658813188	0.12	0.05	non-adj & adj
	QSSWt.ara-5B.4	5B	Single seed weight per primary tiller	Ratio	2016	1	BS00098520_51	-	-		447.74	665810440-665810541	0.049	0.05	non-adj
QTL103	QDTA.aco-5D	5D	Days to anthesis	Pre-treatment	2017	2	D_F1BEJMU01DNFXS_203	D_F1BEJMU01DNFXS_203	D_contig19153_67		180.0-185.6	173763093-174011230	0.050-0.053	0.05	non-adj
	QHI.adr-5D	5D	Harvest index	Drought	2017	1	wsnp_Ku_rep_c72922_72561803	-	-		179.66	123499627-123499828	0.035	0.2	adj
	QSPN.adh-5D	5D	Number of spikes per plant	Drought	2017	1	D_F1BEJMU01DNFXS_203	-	-		180.02	173763093-173763332	0.046	0.2	adj
	QPH.adh-5D	5D	Plant height	Drought & heat	2016	1	RAC875_c63732_246	-	-		na	174005049-174005123	0.053	0.05	non-adj & adj
	QSNp.ara-5D	5D	Seed number per plant	Ratio	2016	1	D_F1BEJMU01DNFXS_203	-	-		180.02	173763093-173763332	0.062	0.2	non-adj
	QSWp.adh-5D	5D	Seed weight per plant	Drought & heat	2017	1	D_F1BEJMU01DNFXS_203	-	-		180.02	173763093-173763332	0.036	0.2	adj
	QSWp.ara-5D	5D	Seed weight per plant	Ratio	2016	1	D_F1BEJMU01DNFXS_203	-	-		180.02	173763093-173763332	0.063	0.2	non-adj
QTL104	QLWP.adr-5D.1	5D	Leaf water potential	Drought	2017	1	GENE-4649_667	-	-		na	268888124-268888224	0.038	0.2	adj
	QSWt.ara-5D.1	5D	Seed weight per primary tiller	Ratio	2017	1	GENE-4649_667	-	-		na	268888124-268888224	0.037	0.2	non-adj
QTL105	QSWt.ara-5D.2	5D	Seed weight per primary tiller	Ratio	2016	1	D_contig08564_373	-	-		na	436117452-436117702	0.1	0.05	non-adj
	QSSWp.ara-5D	5D	Single seed weight per plant	Ratio	2016	1	D_contig08564_373	-	-		na	436117452-436117702	0.127	0.05	non-adj
QTL106	QHI.ara-5D	5D	Harvest index	Ratio	2017	1	D_contig01224_479	-	-		523.54	556878061-556878253	0.057	0.05	non-adj
	QLWP.adr-5D.2	5D	Leaf water potential	Drought	2016	4	GENE-3006_294	D_contig01224_479	Kukri_c17093_1099		523.54	556878061-562726525	0.042-0.048	0.2	non-adj & adj
	QSCRp.adr-5D	5D	Screenings per plant	Drought	2016	1	Tdurum_contig97817_304	-	-		na	565702290-565702390	0.055	0.2	adj
	QSWt.ara-5D.3	5D	Seed weight per primary tiller	Ratio	2017	1	D_contig01224_479	-	-		523.54	556878061-556878253	0.074	0.05	non-adj
	QSPL.adr-5D	5D	Spike length	Drought	2017	1	Tdurum_contig97817_304	-	-		na	565702290-565702390	0.057	0.05	non-adj & adj
QTL107	QHI.ara-6A.1	6A	Harvest index	Ratio	2017	1	D_wsnpbe426362_Contig1_1	-	-		na	12837679-12837867	0.099	0.05	non-adj
	QSCRp.adr-6A.1	6A	Screenings per plant	Drought	2017	1	RAC875_c38494_52	-	-		na	14606979-14607079	0.035	0.2	non-adj
	QSCRt.adh-6A	6A	Screenings per primary tiller	Drought & heat	2016	9	CAP12_c2970_74	RAC875_c23552_1354	RAC875_c18020_1393		77.7-80.1	15747944-15781372	0.062-0.076	0.2	non-adj
	QSNp.ara-6A	6A	Seed number per plant	Ratio	2016	11	wsnp_Ex_c56091_58346461	RAC875_s119505_143	CAP12_c2970_74		77.7-80.1	15728396-16232972	0.063-0.078	0.2	non-adj
	QSWp.ara-6A	6A	Seed weight per plant	Ratio	2016	7	RAC875_c6137_562 / RAC875_s119505_143	RAC875_c6137_562	RAC875_c23552_811		77.7-80.1	15734630-15748487	0.076-0.087	0.05	non-adj
	QSWt.ara-6A.1	6A	Seed weight per primary tiller	Ratio	2016	1	RAC875_c16255_570	-	-		na	15735648-15735745	0.048	0.2	non-adj
	QSWt.ara-6A.1	6A	Seed weight per primary tiller	Ratio	2017	1	D_wsnpbe426362_Contig1_1	-	-		na	12837679-12837867	0.118	0.05	non-adj
	QSSWp.ara-6A	6A	Single seed weight per plant	Ratio	2016	1	RAC875_c16255_570	-	-		na	15735648-15735745	0.05	0.2	non-adj
QTL108	QLWP.adr-6A.1	6A	Leaf water potential	Drought	2016	1	BobWhite_c32377_62	-	-		115.83	26977173-26977235	0.044	0.2	non-adj & adj
	QLWP.adh-6A	6A	Leaf water potential	Drought & heat	2016	1	Ex_c6607_2084	-	-		na	22692919-22693020	0.057	0.05	non-adj & adj
	QLWP.ara-6A	6A	Leaf water potential	Ratio	2016	2	Ex_c6607_2084	Ex_c6607_2084	Tdurum_contig11414_310		112.38	22692919-25635118	0.060-0.063	0.2	non-adj
	QSWt.ara-6A.2	6A	Seed weight per primary tiller	Ratio	2016	1	BS00110245_51	-	-		na	25692938-25693039	0.076	0.05	non-adj
QTL109	QBM.adh-6A	6A	Biomass	Drought & heat	2016	10	IACX6453 / Kukri_c16463_584	Kukri_c9595_242	Kukri_c16463_584		178.63	85756394-88774114	0.024-0.035	0.2	adj
	QLWP.adr-6A.2	6A	Leaf water potential	Drought	2016	4	BS00092676_51	BS00092676_51	BS00066636_51		na	90033815-99014241	0.055-0.057	0.05	adj
	QSWt.ara-6A.3	6A	Seed weight per primary tiller	Ratio	2017	1	BS00012297_51	-	-		na	93818249-93818349	0.036	0.2	non-adj
QTL110	QHI.ara-6A.2	6A	Harvest index	Ratio	2017	1	wsnp_BF202329A_Ta_2_2	-	-		190.27	448229474-448229595	0.065	0.05	non-adj
	QLWP.adr-6A.3	6A	Leaf water potential	Drought	2017	1	wsnp_BF202329A_Ta_2_2	-	-		190.27	448229474-448229595	0.114	0.05	adj
	QSWt.ara-6A.4	6A	Seed weight per primary tiller	Ratio	2017	1	wsnp_BF202329A_Ta_2_2	-	-		190.27	448229474-448229595	0.087	0.05	non-adj
QTL111	QLWP.adr-6A.4	6A	Leaf water potential	Drought	2016	3	Ku_c56003_719	Tdurum_contig29629_437	Ku_c21399_772		204.7	550738241-550960496	0.041-0.042	0.2	adj
	QSCRt.adr-6A	6A	Screenings per primary tiller	Drought	2016	2	Ra_c11721_766	Ra_c11721_766	Ku_c21399_772		204.7	550955740-550960496	0.053	0.2	adj
QTL112	QHI.ara-6A.3	6A	Harvest index	Ratio	2017	4	RAC875_c4529_3312	RAC875_c4529_3312	Tdurum_contig77175_150		238.31	578513923-578514205	0.043-0.046	0.2	non-adj
	QSCRp.adr-6A.2	6A	Screenings per plant	Drought	2017	1	wsnp_Ex_c34641_42914170	-	-		239.26	581892912-581892979	0.035	0.2	non-adj
	QSWt.ara-6A.5	6A	Seed weight per primary tiller	Ratio	2017	4	RAC875_c4529_3312	RAC875_c4529_3312	Tdurum_contig77175_150		238.31	578513923-578514205	0.054-0.057	0.05	non-adj
QTL113	QHI.ara-6A.4	6A	Harvest index	Ratio	2017	1	RAC875_c6429_973	-	-		na	614164608-614164708	0.112	0.05	non-adj
	QSWt.ara-6A.6	6A	Seed weight per primary tiller	Ratio	2017	2	RAC875_c6429_973	Ku_c12629_1157	RAC875_c6429_973		na	613487296-614164708	0.049-0.094	0.05	non-adj
QTL114	QLWP.adh-6B.1	6B	Leaf water potential	Drought & heat	2016	1	Ex_c55514_718	-	-		na	25254986-25255086	0.051	0.05	non-adj & adj
	QSWp.ara-6B.1	6B	Seed weight per plant	Ratio	2017	1	BS00022579_51	-	-		na	26625312-26625412	0.077	0.05	non-adj
	QSWt.ara-6B.1	6B	Seed weight per primary tiller	Ratio	2016	2	BS00022579_51	BS00022579_51	BS00109708_51		na	26625412-44284234	0.078-0.090	0.05	non-adj
	QSSWp.ara-6B.1	6B	Single seed weight per plant	Ratio	2016	1	BS00022579_51	-	-		na	26625311-26625412	0.087	0.05	non-adj
QTL115	QLWP.adr-6B.1	6B	Leaf water potential	Drought	2016	1	Ra_c42372_207	-	-		146.01	46767035-46767136	0.07	0.05	non-adj & adj
	QLWP.adr-6B.1	6B	Leaf water potential	Drought	2017	1	Ra_c42372_207	-	-		146.01	46767035-46767136	0.059	0.05	adj
	QSSWp.ara-6B.2	6B	Single seed weight per plant	Ratio	2016	1	BS00109708_51	-	-		na	44284234-44284335	0.052	0.2	non-adj
QTL116	QLWP.adr-6B.2	6B	Leaf water potential	Drought	2016	2	RFL_Contig4514_470	RFL_Contig4514_470	Excalibur_s113095_68		na	71040399-71495726	0.099-0.110	0.05	non-adj & adj
	QSCRp.adr-6B.1	6B	Screenings per plant	Drought	2016	1	Excalibur_s113095_68	-	-		na	71495625-71495726	0.076	0.05	non-adj & adj
	QSCRt.adr-6B.1	6B	Screenings per primary tiller	Drought	2016	1	Excalibur_s113095_68	-	-		na	71495625-71495726	0.053	0.2	adj
	QSWp.adh-6B	6B	Seed weight per plant	Drought & heat	2017	1	RFL_Contig4514_470	-	-		na	71040399-71040500	0.033	0.2	adj
QTL117	QLWP.adh-6B.2	6B	Leaf water potential	Drought & heat	2017	1	Kukri_c48571_361	-	-		194.92	121782192-121782293	0.043	0.2	adj
	QSCRp.adr-6B.2	6B	Screenings per plant	Drought	2017	22	RAC875_c33609_381	RAC875_c33609_381	wsnp_Ku_c13325_21275440		194.6-195.3	127319347-129272864	0.034-0.039	0.2	non-adj
	QSWt.ara-6B.2	6B	Seed weight per primary tiller	Ratio	2017	1	BS00023168_51	-	-		na	130829833-130829933	0.045	0.05	non-adj
QTL118	QHI.ara-6B.1	6B	Harvest index	Ratio	2017	2	Excalibur_c11455_93	Excalibur_c11455_93	GENE-3717_141		233.61	216690288-217158997	0.066-0.078	0.05	non-adj
	QSWp.ara-6B.2	6B	Seed weight per plant	Ratio	2017	2	Excalibur_c11455_93	Excalibur_c11455_93	GENE-3717_141		233.61	216690288-217158997	0.092-0.107	0.05	non-adj
	QSWt.ara-6B.3	6B	Seed weight per primary tiller	Ratio	2017	2	Excalibur_c11455_93	Excalibur_c11455_93	GENE-3717_141		233.61	216690288-217158997	0.089-0.105	0.05	non-adj
QTL119	QHI.ara-6B.2	6B	Harvest index	Ratio	2017	11	RAC875_c18532_140	RAC875_c18532_140	BobWhite_c1977_844		na	500248398-501107853	0.058-0.063	0.05	non-adj
	QSWt.ara-6B.4	6B	Seed weight per primary tiller	Ratio	2017	15	RAC875_c18532_140	RAC875_c18532_140	RAC875_c29975_80		na	500248398-513142128	0.051-0.081	0.05	non-adj
QTL120	QSWt.ara-6B.5	6B	Seed weight per primary tiller	Ratio	2016	1	IAAV3589	-	-		na	590667451-590667583	0.08	0.05	non-adj
	QSWt.ara-6B.5	6B	Seed weight per primary tiller	Ratio	2017	1	IAAV3589	-	-		na	590667451-590667583	0.042	0.2	non-adj
	QSSWp.ara-6B.3	6B	Single seed weight per plant	Ratio	2016	1	IAAV3589	-	-		na	590667451-590667583	0.061	0.2	non-adj
	QSSWt.ara-6B	6B	Single seed weight per primary tiller	Ratio	2016	1	IAAV3589	-	-		na	590667451-590667583	0.079	0.05	non-adj
QTL121	QBM.adh-6B	6B	Biomass	Drought & heat	2016	5	Excalibur_c23296_820	BobWhite_c30500_527	Excalibur_c42979_666		259.79	648695521-652374593	0.039-0.055	0.05	non-adj
	QHI.ara-6B.3	6B	Harvest index	Ratio	2017	3	CAP12_c7838_89	CAP12_c7838_89	Excalibur_c42979_460		na	652374395-652374782	0.102-0.130	0.05	non-adj
	QLWP.adr-6B.3	6B	Leaf water potential	Drought	2016	1	RAC875_c27635_748	-	-		na	646565102-646565202	0.035	0.2	non-adj
	QSCRp.adr-6B.3	6B	Screenings per plant	Drought	2016	3	CAP12_c7838_89	CAP12_c7838_89	Excalibur_c42979_460		na	652374395-652374782	0.056-0.068	0.2	non-adj & adj
	QSCRt.adr-6B.2	6B	Screenings per primary tiller	Drought	2016	2	CAP12_c7838_89	CAP12_c7838_89	Excalibur_c42979_460		na	652374395-652374782	0.072-0.078	0.05	non-adj & adj
	QSWt.ara-6B.6	6B	Seed weight per primary tiller	Ratio	2017	3	CAP12_c7838_89	CAP12_c7838_89	Excalibur_c42979_460		na	652374395-652374782	0.124-0.154	0.05	non-adj
QTL122	QHI.ara-6B.4	6B	Harvest index	Ratio	2017	2	IACX243	D_wsnpCD373543AT_Contig1_1	IACX243		na	712346303-712346484	0.036-0.037	0.2	non-adj
	QSCRp.adr-6B.4	6B	Screenings per plant	Drought	2016	1	RAC875_c17847_123	-	-		na	705384526-705384626	0.041	0.2	non-adj
	QSWp.ara-6B.3	6B	Seed weight per plant	Ratio	2017	2	IACX243	D_wsnpCD373543AT_Contig1_1	IACX243		na	712346303-712346484	0.048-0.049	0.2	non-adj
	QSWt.ara-6B.7	6B	Seed weight per primary tiller	Ratio	2016	2	CAP12_c67_212	tplb0046e21_1294	CAP12_c67_212		375.2-388.2	708024194-708047446	0.056-0.058	0.2	non-adj
	QSWt.ara-6B.7	6B	Seed weight per primary tiller	Ratio	2017	2	IACX243	D_wsnpCD373543AT_Contig1_1	IACX243		na	712346303-712346484	0.055-0.056	0.05	non-adj
	QSSWp.ara-6B.4	6B	Single seed weight per plant	Ratio	2016	2	tplb0046e21_1294	tplb0046e21_1294	CAP12_c67_212		375.2-388.2	708024194-708047446	0.047-0.051	0.2	non-adj
QTL123	QSCRp.adh-6D	6D	Screenings per plant	Drought & heat	2017	1	Ra_c23837_298	-	-		228.77	434482297-434482398	0.074	0.2	adj
	QSCRt.adh-6D	6D	Screenings per primary tiller	Drought & heat	2017	1	Ra_c23837_298	-	-		228.77	434482297-434482398	0.072	0.2	adj
QTL124	QHI.ara-6D	6D	Harvest index	Ratio	2017	3	D_contig07343_351	D_contig07343_351	Excalibur_c45920_424		269.71	454232796-465347543	0.047-0.070	0.05	non-adj
	QSWt.ara-6D.1	6D	Seed weight per primary tiller	Ratio	2017	3	D_contig07343_351	D_contig07343_351	Excalibur_c45920_424		269.71	454232796-465347543	0.073-0.088	0.05	non-adj
QTL125	QHI.adr-6D	6D	Harvest index	Drought	2016	3	IACX11026	BS00080044_51	Ra_c16172_309		330.34	466331216-466944271	0.025-0.028	0.2	non-adj
	QSCRp.adr-6D	6D	Screenings per plant	Drought	2017	1	IACX5886	-	-		na	466944190-466944271	0.045	0.2	non-adj
	QSNp.ara-6D	6D	Seed number per plant	Ratio	2016	1	Ra_c8058_1047	-	-		na	469831237-469831337	0.129	0.05	non-adj
	QSWp.ara-6D	6D	Seed weight per plant	Ratio	2016	2	Ra_c8058_1047	JD_c14945_219	Ra_c8058_1047		na	469574758-469831237	0.087-0.140	0.05	non-adj
	QSWp.ara-6D	6D	Seed weight per plant	Ratio	2017	3	IACX5886	RAC875_rep_c115101_119	IACX5886		na	461924775-466944271	0.050-0.057	0.2	non-adj
	QSWt.ara-6D.2	6D	Seed weight per primary tiller	Ratio	2016	1	BobWhite_c4803_139	-	-		na	471922285-471922386	0.085	0.05	non-adj
	QSSWp.ara-6D	6D	Single seed weight per plant	Ratio	2016	1	BobWhite_c4803_139	-	-		na	471922285-471922386	0.076	0.05	non-adj
QTL126	QHI.adr-7A	7A	Harvest index	Drought	2016	1	Tdurum_contig28195_198	-	-		na	63443614-63443715	0.037	0.2	non-adj
	QHI.ara-7A.1	7A	Harvest index	Ratio	2017	1	Tdurum_contig28195_198	-	-		na	63443614-63443715	0.095	0.05	non-adj
	QSCRt.ara-7A	7A	Screenings per primary tiller	Ratio	2016	2	Kukri_c106476_709	Kukri_c106476_709	RFL_Contig3271_810		261.96	62528244-62528953	0.043-0.051	0.2	non-adj
	QSWt.ara-7A.1	7A	Seed weight per primary tiller	Ratio	2016	1	Tdurum_contig28195_198	-	-		na	63443614-63443715	0.147	0.05	non-adj
	QSWt.ara-7A.1	7A	Seed weight per primary tiller	Ratio	2017	1	Tdurum_contig28195_198	-	-		na	63443614-63443715	0.118	0.05	non-adj
	QSSWp.ara-7A	7A	Single seed weight per plant	Ratio	2016	1	Tdurum_contig28195_198	-	-		na	63443614-63443715	0.117	0.05	non-adj
	QSSWt.ara-7A	7A	Single seed weight per primary tiller	Ratio	2016	1	Tdurum_contig28195_198	-	-		na	63443614-63443715	0.124	0.05	non-adj
QTL127	QBM.adh-7A	7A	Biomass	Drought & heat	2017	2	RAC875_rep_c111888_724	RAC875_c39237_193	RAC875_rep_c111888_724		na	76491583-76500820	0.035-0.037	0.2	adj
	QSPL.adr-7A	7A	Spike length	Drought	2017	1	RAC875_rep_c111888_724	-	-		na	76500719-76500820	0.056	0.05	non-adj & adj
QTL128	QHI.ara-7A.2	7A	Harvest index	Ratio	2017	1	Excalibur_c52798_196	-	-		na	546043191-546043291	0.073	0.05	non-adj
	QSWt.ara-7A.2	7A	Seed weight per primary tiller	Ratio	2017	1	Excalibur_c52798_196	-	-		na	546043191-546043291	0.088	0.05	non-adj
QTL129	QHI.ara-7A.3	7A	Harvest index	Ratio	2017	1	Kukri_c1697_202	-	-		na	739819464-739819531	0.043	0.2	non-adj
	QSWt.ara-7A.3	7A	Seed weight per primary tiller	Ratio	2017	1	Kukri_c1697_202	-	-		na	739819464-739819531	0.059	0.05	non-adj
QTL130	QHI.ara-7B.1	7B	Harvest index	Ratio	2017	1	Excalibur_c53111_144	-	-		na	1258258-1258359	0.072	0.05	non-adj
	QLWP.adr-7B.1	7B	Leaf water potential	Drought	2016	4	Tdurum_contig30677_55	Tdurum_contig85266_280	Tdurum_contig30677_55		70.0-87.3	6371951-6393796	0.055-0.103	0.05	non-adj & adj
	QSCRp.adr-7B	7B	Screenings per plant	Drought	2016	1	Tdurum_contig30677_55	-	-		87.3	6393695-6393796	0.052	0.05	non-adj & adj
	QSCRt.adr-7B.1	7B	Screenings per primary tiller	Drought	2016	8	RAC875_c36670_72	Tdurum_contig85266_280	Tdurum_contig30677_55		61.4-87.3	6153847-6393796	0.071-0.091	0.05	non-adj & adj
	QSWp.ara-7B	7B	Seed weight per plant	Ratio	2017	1	Excalibur_c53111_144	-	-		na	1258258-1258359	0.098	0.05	non-adj
	QSWt.ara-7B.1	7B	Seed weight per primary tiller	Ratio	2016	2	Tdurum_contig30677_55	Excalibur_c3423_994	Tdurum_contig30677_55		77.0-87.3	6371951-6393695	0.046-0.047	0.2	non-adj
	QSWt.ara-7B.1	7B	Seed weight per primary tiller	Ratio	2017	1	Excalibur_c53111_144	-	-		na	1258258-1258359	0.108	0.05	non-adj
QTL131	QSWt.ara-7B.2	7B	Seed weight per primary tiller	Ratio	2016	1	Tdurum_contig66398_976	-	-		na	23441058-23441158	0.045	0.2	non-adj
	QSSWp.ara-7B.1	7B	Single seed weight per plant	Ratio	2016	1	Tdurum_contig66398_976	-	-		na	23441058-23441158	0.05	0.2	non-adj
	QSSWt.ara-7B	7B	Single seed weight per primary tiller	Ratio	2016	1	Tdurum_contig66398_976	-	-		na	23441058-23441158	0.081	0.05	non-adj
QTL132	QBM.adh-7B.1	7B	Biomass	Drought & heat	2017	1	wsnp_Ex_c11106_18003332	-	-		176.81	41543017-41543125	0.035	0.2	adj
	QDTA.aco-7B.1	7B	Days to anthesis	Pre-treatment	2017	3	Kukri_c21624_91	Kukri_c21624_91	Ku_c10026_349		186.24	47741671-48457468	0.026-0.029	0.2	non-adj
	QHI.adh-7B	7B	Harvest index	Drought & heat	2017	6	Kukri_c21624_91	BS00035630_51	Kukri_c18530_1054		172.1-186.2	47000676-59058350	0.036-0.049	0.2	adj
	QSNp.adh-7B	7B	Seed number per plant	Drought & heat	2017	5	Kukri_rep_c104213_234	Kukri_c21624_91	Kukri_c19823_491		186.24	47741671-58539951	0.040-0.044	0.2	adj
	QSWp.adh-7B	7B	Seed weight per plant	Drought & heat	2017	7	Kukri_c21624_91	wsnp_Ex_c11106_18003332	Kukri_c18530_1054		176.8-186.2	41543017-59058350	0.041-0.049	0.05	adj
	QSWt.adh-7B	7B	Seed weight per primary tiller	Drought & heat	2017	7	Kukri_c21624_91	wsnp_Ex_c11106_18003332	Kukri_c18530_1054		172.1-186.2	41543017-59058350	0.040-0.046	0.2	adj
QTL133	QSWt.ara-7B.3	7B	Seed weight per primary tiller	Ratio	2016	1	Excalibur_c31010_376	-	-		233.68	428095587-428095687	0.045	0.2	non-adj
	QSSWp.ara-7B.2	7B	Single seed weight per plant	Ratio	2016	1	Excalibur_c31010_376	-	-		233.68	428095587-428095687	0.047	0.2	non-adj
QTL134	QDTA.aco-7B.2	7B	Days to anthesis	Pre-treatment	2017	4	Tdurum_contig43966_1107	RAC875_rep_c73821_223	Tdurum_contig43966_1107		258.6-261.8	593059758-593187198	0.029-0.038	0.2	non-adj
	QSWt.ara-7B.4	7B	Seed weight per primary tiller	Ratio	2017	1	Ra_c9700_1264	-	-		na	595169978-595170078	0.041	0.2	non-adj
QTL135	QHI.ara-7B.2	7B	Harvest index	Ratio	2017	1	BS00026076_51	-	-		na	679682204-679682305	0.086	0.05	non-adj
	QSWt.ara-7B.5	7B	Seed weight per primary tiller	Ratio	2016	1	BS00026076_51	-	-		na	679682204-679682305	0.049	0.2	non-adj
	QSWt.ara-7B.5	7B	Seed weight per primary tiller	Ratio	2017	1	BS00026076_51	-	-		na	679682204-679682305	0.085	0.05	non-adj
	QSSWp.ara-7B.3	7B	Single seed weight per plant	Ratio	2016	1	BS00026076_51	-	-		na	679682204-679682305	0.056	0.2	non-adj
QTL136	QBM.adr-7B	7B	Biomass	Drought	2016	1	BS00066404_51	-	-		na	712736164-712736264	0.036	0.2	adj
	QBM.adh-7B.2	7B	Biomass	Drought & heat	2016	1	BS00066404_51	-	-		na	712736164-712736264	0.044	0.05	non-adj
	QHI.ara-7B.3	7B	Harvest index	Ratio	2017	1	Tdurum_contig61899_397	-	-		463.6	709468761-709468862	0.058	0.05	non-adj
	QLWP.adr-7B.2	7B	Leaf water potential	Drought	2016	1	BS00048723_51	-	-		na	711539403-711539503	0.04	0.2	adj
	QSCRt.adr-7B.2	7B	Screenings per primary tiller	Drought	2016	1	Kukri_c3148_780	-	-		ba	711361916-711362016	0.061	0.2	adj
	QSWt.ara-7B.6	7B	Seed weight per primary tiller	Ratio	2017	2	Ku_c108027_54	Ku_c108027_54	Tdurum_contig61899_397		463.6	701871740-709468862	0.056-0.058	0.05	non-adj
QTL137	QSWt.ara-7D.1	7D	Seed weight per primary tiller	Ratio	2016	1	RAC875_c57243_236	-	-		na	58740546-58740646	0.059	0.2	non-adj
	QSSWp.ara-7D.1	7D	Single seed weight per plant	Ratio	2016	1	RAC875_c57243_236	-	-		na	58740546-58740646	0.048	0.2	non-adj
	QSSWt.ara-7D	7D	Single seed weight per primary tiller	Ratio	2016	1	RAC875_c57243_236	-	-		na	58740546-58740646	0.056	0.05	non-adj
QTL138	QLWP.adr-7D.1	7D	Leaf water potential	Drought	2017	2	IACX18824	BS00039197_51	IACX18824		276.64	156688449-159408511	0.042-0.051	0.2	adj
	QSWt.ara-7D.2	7D	Seed weight per primary tiller	Ratio	2016	1	BS00039197_51	-	-		276.64	156688449-156688549	0.073	0.05	non-adj
	QSWt.ara-7D.2	7D	Seed weight per primary tiller	Ratio	2017	1	BS00039197_51	-	-		276.64	156688449-156688549	0.045	0.05	non-adj
	QSSWp.ara-7D.2	7D	Single seed weight per plant	Ratio	2016	2	BS00016426_51	BS00016426_51	BS00039197_51		276.64	156220366-156688549	0.055-0.057	0.2	non-adj
QTL139	QHI.adr-7D	7D	Harvest index	Drought	2017	1	BS00049220_51	-	-		na	458014917-458015017	0.034	0.2	adj
	QHI.ara-7D.1	7D	Harvest index	Ratio	2017	1	wsnp_cd373508D_Ta_1_1	-	-		304.7	457149061-457149182	0.077	0.05	non-adj
	QSWt.ara-7D.3	7D	Seed weight per primary tiller	Ratio	2017	1	wsnp_cd373508D_Ta_1_1	-	-		304.7	457149061-457149182	0.093	0.05	non-adj
QTL140	QHI.ara-7D.2	7D	Harvest index	Ratio	2017	3	Excalibur_c31735_115	GENE-4717_525	Excalibur_c31735_115		427.9	611820262-614539532	0.052-0.055	0.05	non-adj
	QLWP.adr-7D.2	7D	Leaf water potential	Drought	2017	1	Ex_c24486_509	-	-		429.77	615485409-615485510	0.037	0.2	adj
	QSWt.ara-7D.4	7D	Seed weight per primary tiller	Ratio	2017	10	Excalibur_rep_c106395_104	GENE-4717_482	Excalibur_c31735_115		423.2-427.9	611820219-614539532	0.036-0.069	0.05	non-adj

## Sheet: Table S5
Supplementary Table 5. Descriptive statistics of traits measured in near-isogenic lines grown under combined drought and heat stress. Max, maximum; min, minimum; NIL, near isogenic line.
		exotic allele				non-exotic allele
Trait	NIL pair	Mean	Min	Max		Mean	Min	Max	Standard error	p-value
Days to anthesis	1	106.667	105	110		107	107	107	1.17851	0.8512
	2	103	103	103		104.333	103	107	0.942809	0.3739
	3	103	103	103		102.667	100	105	1.0274	0.8298
	4	103	103	103		102	100	103	0.707107	0.4226
Number of spikes per plot	1	51.3333	44	57		49	43	57	4.00694	0.7016
	2	62.6667	57	73		65	57	71	4.69633	0.7431
	3	49.6667	49	50		44	37	49	2.56038	0.1926
	4	58.6667	53	66		54.6667	36	72	7.84927	0.7368
Spike length (cm)	1	7.86667	7.1	8.8		8.01333	7.5	9.1	0.125078	0.414
	2	9.26	8	9.9		9.44	8.5	11	0.159851	0.4326
	3	8.64	7.1	9.6		9.14667	8.4	10.1	0.167427	0.04122
	4	9.76667	8.6	10.9		9.97333	9.4	10.6	0.140091	0.3058
Plant height (cm)	1	96.9933	74.7	112.7		98.2267	89.3	115.3	1.45876	0.5551
	2	90.7833	83.6	97.2		84.7833	76.2	93.5	0.906164	5.569e-05
	3	83.3425	77	93.6		82.3241	67.5	90.9	1.29679	0.51155
	4	82.6067	76.2	88.6		80.42	66.8	87	1.21054	0.21279
Biomass per plot (g)	1	175.986	126	200.81		160.648	130.47	200.14	0.174069	0.0129
	2	162.773	149.22	183.88		164.417	139.83	182.16	11.7346	0.9259
	3	155.427	142.48	167.65		117.493	86.4	136.31	12.2104	0.09299
	4	179.253	127.24	247.6		156.863	101.97	224.29	35.7773	0.681
Screenings per spike (%)	1	0.106667	0	0.5		0.193333	0	1.3	0.0830758	0.4669
	2	0.0733333	0	1.1		0.646667	0	2.5	0.150132	0.01162
	3	1.02667	0	3.7		0.706667	0	2.6	0.27455	0.4168
	4	0.963333	0	2.3		1.07	0	8.1	0.46481	0.054343
Screenings per plot (%)	1	0.216667	0.09	0.32		0.216667	0.1	0.28	0.0630696	1
	2	0.26	0.07	0.57		0.413333	0.19	0.57	0.137073	0.4732
	3	0.836667	0.71	0.97		1.27333	1	1.8	0.193678	0.1861
	4	0.63	0.43	1.03		2.01333	0.57	4.15	0.783649	0.28
Seed number per spike	1	36.5333	31	43		35.1333	22	39	1.10353	0.3773
	2	36.9333	27	43		36	28	43	1.12009	0.5604
	3	37.4	28	46		41.6	34	50	1.28656	0.02858
	4	46.1833	38	60		48.6167	37	56	1.74088	0.82
Seed number per plot	1	1578.72	1243	1744		1441.62	1264	1770	1.45057	0.011777
	2	1662	1531	1845		1774.67	1545	1903	105.214	0.4911
	3	1523	1398	1594		1246.33	1008	1423	98.064	0.1168
	4	2146.67	1500	2897		1902.67	1256	2759	426.944	0.7068
Single seed weight per spike (mg)	1	45.0067	0.0377	0.0527		46.8	0.0375	0.0581	1.11913	0.2668
	2	41.6867	0.0345	0.0465		40.3067	0.0361	0.0454	0.707623	0.1788
	3	45.4933	0.0422	0.0495		39.9267	0.0301	0.0479	0.944557	0.0002679
	4	40.4833	0.0345	0.0478		39.7033	0.0309	0.0463	0.803729	0.210477
Thousand kernel weight (g)	1	44.04	40.76	46.28		44	41.4	46.2	1.54428	0.9863
	2	40.05	38.54	41.07		39.1633	38.11	39.78	0.660875	0.3965
	3	43.8967	43.17	44.68		39.0767	36.72	41.06	0.947441	0.02281
	4	39.5633	38.15	42.25		38.4033	34.41	41.18	0.0580948	0.02315
Seed weight per spike (g)	1	1.64284	1.2055	1.9713		1.62781	1.2787	1.9354	0.0477952	0.8257
	2	1.53368	1.1452	1.687		1.44228	1.2465	1.7234	0.0358578	0.08226
	3	1.70033	1.1975	2.116		1.65051	1.2654	1.9074	0.0556622	0.5319
	4	1.91303	1.3851	2.8555		1.89708	1.237	2.4552	0.0777361	0.42758
Seed weight per plot (g)	1	69.6825	50.6	78.29		63.3975	52.31	80.71	0.205982	0.03767
	2	66.6633	62.08	75.75		69.3267	60.32	74.7	4.53733	0.6994
	3	66.4067	59.99	70.63		48.86	36.99	55.98	4.81296	0.06146
	4	85.9267	59.06	122.16		73.7333	43.5	113.36	19.78	0.6854
Harvest index per plot	1	0.396417	0.388775	0.401587		0.394521	0.379361	0.403268	0.00604638	0.8354
	2	0.409489	0.399948	0.416566		0.422493	0.410079	0.431381	0.00572069	0.1833
	3	0.427219	0.421042	0.439321		0.417307	0.410682	0.428125	0.00576064	0.2906
	4	0.475821	0.464162	0.493376		0.459266	0.426596	0.505417	0.0179302	0.5495

## Sheet: Table S6
Supplementary Table 6. High confidence genes in the 6A QTL interval according to the IWGSC RefSeq v.1.0 annotation.
ID	Position	Description
TraesCS6A01G025800	chr6A:12857365..12858830 (+ strand)	F-box domain containing protein, expressed
TraesCS6A01G025900	chr6A:12890959..12892731 (- strand)	F-box domain containing protein, expressed
TraesCS6A01G026000	chr6A:12949456..12950339 (+ strand)	F-box family protein
TraesCS6A01G026100	chr6A:12958615..12959868 (- strand)	Plant/F1M20-13 protein
TraesCS6A01G026200	chr6A:13009260..13019273 (+ strand)	Two-component response regulator
TraesCS6A01G026300	chr6A:13062935..13067335 (+ strand)	Holliday junction ATP-dependent DNA helicase RuvB
TraesCS6A01G026400	chr6A:13067422..13067964 (- strand)	Chaperone DnaJ
TraesCS6A01G026500	chr6A:13071476..13080970 (- strand)	Lysine-specific demethylase 3B
TraesCS6A01G026600	chr6A:13382681..13386524 (- strand)	Protein KINESIN LIGHT CHAIN-RELATED 3
TraesCS6A01G026700	chr6A:13434481..13434774 (+ strand)	Flowering promoting factor-like 1
TraesCS6A01G026800	chr6A:13503420..13505079 (- strand)	3-ketoacyl-CoA synthase
TraesCS6A01G026900	chr6A:13659970..13665174 (+ strand)	Elongation factor P-like protein, putative isoform 3
TraesCS6A01G027000	chr6A:13665241..13667932 (- strand)	GDSL esterase/lipase
TraesCS6A01G027100	chr6A:13672236..13677629 (+ strand)	F-box family protein
TraesCS6A01G027200	chr6A:13684630..13685040 (- strand)	Retrotransposon protein, putative, unclassified
TraesCS6A01G027300	chr6A:13734020..13738469 (+ strand)	F-box protein
TraesCS6A01G027400	chr6A:13806361..13814005 (- strand)	Protein kinase family protein
TraesCS6A01G027500	chr6A:13878481..13878837 (- strand)	Bifunctional lycopene cyclase/phytoene synthase
TraesCS6A01G027600	chr6A:13895842..13903153 (- strand)	Disease resistance protein RPM1
TraesCS6A01G027700	chr6A:14149399..14149797 (- strand)	Phytoene synthase 2
TraesCS6A01G027800	chr6A:14178850..14183455 (+ strand)	downstream target of AGL15 2
TraesCS6A01G027900	chr6A:14301530..14303492 (+ strand)	Allene oxide synthase
TraesCS6A01G028000	chr6A:14368434..14372453 (+ strand)	Vesicle transport protein USE1
TraesCS6A01G028100	chr6A:14373125..14377288 (- strand)	60 kDa chaperonin
TraesCS6A01G028200	chr6A:14385598..14386381 (+ strand)	Protein kinase superfamily protein
TraesCS6A01G028300	chr6A:14388953..14390566 (+ strand)	Leucine-rich repeat receptor-like protein kinase family protein
TraesCS6A01G028400	chr6A:14401551..14405131 (+ strand)	Leucine-rich repeat receptor-like protein kinase family protein
TraesCS6A01G028500	chr6A:14483177..14484427 (+ strand)	Leucine-rich repeat receptor-like protein kinase family protein
TraesCS6A01G028600	chr6A:14568767..14569231 (- strand)	Polynucleotidyl transferase, ribonuclease H-like superfamily protein
TraesCS6A01G028700	chr6A:14602988..14604026 (- strand)	Germin-like protein
TraesCS6A01G028800	chr6A:14606554..14610239 (- strand)	Subtilisin-like protease
TraesCS6A01G028900	chr6A:15383166..15383381 (- strand)	4-hydroxy-3-methylbut-2-enyl diphosphate reductase
TraesCS6A01G029000	chr6A:15385306..15385866 (- strand)	CAI-1 autoinducer sensor kinase/phosphatase cqsS isoform 1
TraesCS6A01G029100	chr6A:15435891..15439664 (+ strand)	Receptor-like protein kinase
TraesCS6A01G029200	chr6A:15442671..15445793 (- strand)	Leucine-rich repeat receptor-like protein kinase family protein
TraesCS6A01G029300	chr6A:15452625..15455419 (+ strand)	Epoxide hydrolase 2
TraesCS6A01G029400	chr6A:15456450..15461712 (- strand)	transmembrane protein, putative (DUF247)
TraesCS6A01G029500	chr6A:15488827..15489867 (- strand)	Ta11-like non-LTR retrotransposon
TraesCS6A01G029600	chr6A:15490653..15492338 (- strand)	transmembrane protein, putative (DUF247)
TraesCS6A01G029700	chr6A:15540656..15543299 (+ strand)	transmembrane protein, putative (DUF247)
TraesCS6A01G029800	chr6A:15576557..15583953 (- strand)	Peroxidase
TraesCS6A01G029900	chr6A:15626844..15628848 (- strand)	Acetyl-coenzyme A synthetase
TraesCS6A01G030000	chr6A:15647188..15648682 (+ strand)	Mitochondrial transcription termination factor-like
TraesCS6A01G030100	chr6A:15652828..15656157 (- strand)	NBS-LRR-like resistance protein
TraesCS6A01G030200	chr6A:15684863..15686060 (+ strand)	Mitochondrial transcription termination factor-like
TraesCS6A01G030300	chr6A:15694531..15695962 (+ strand)	Mitochondrial transcription termination factor-like
TraesCS6A01G030400	chr6A:15698963..15701882 (+ strand)	Mitochondrial transcription termination factor-like
TraesCS6A01G030500	chr6A:15706692..15707582 (- strand)	2-oxoglutarate (2OG) and Fe(II)-dependent oxygenase superfamily protein
TraesCS6A01G030600	chr6A:15717427..15717963 (+ strand)	Mitochondrial transcription termination factor-like
TraesCS6A01G030700	chr6A:15727844..15729367 (+ strand)	High affinity nitrate transporter
TraesCS6A01G030800	chr6A:15734520..15736043 (+ strand)	High affinity nitrate transporter
TraesCS6A01G030900	chr6A:15747526..15749383 (+ strand)	High-affinity nitrate transporter
TraesCS6A01G031000	chr6A:15756560..15758437 (+ strand)	High affinity nitrate transporter
TraesCS6A01G031100	chr6A:15765759..15767783 (+ strand)	High affinity nitrate transporter
TraesCS6A01G031200	chr6A:15781020..15782725 (- strand)	High affinity nitrate transporter
TraesCS6A01G031300	chr6A:15828880..15829834 (+ strand)	Polyadenylate-binding protein 2
TraesCS6A01G031400	chr6A:15863959..15866757 (- strand)	ATP-dependent RNA helicase-like protein
TraesCS6A01G031500	chr6A:15868184..15868948 (+ strand)	2-oxoglutarate (2OG) and Fe(II)-dependent oxygenase superfamily protein
TraesCS6A01G031600	chr6A:15872028..15873188 (- strand)	Mitochondrial transcription termination factor-like
TraesCS6A01G031700	chr6A:15890246..15894750 (- strand)	Mitochondrial transcription termination factor-like
TraesCS6A01G031800	chr6A:15905261..15907003 (- strand)	Mitochondrial transcription termination factor-like
TraesCS6A01G031900	chr6A:15912986..15913525 (- strand)	Mitochondrial transcription termination factor-like
TraesCS6A01G032000	chr6A:15916289..15916750 (+ strand)	Disease resistance protein RPP13
TraesCS6A01G032100	chr6A:15924074..15925234 (- strand)	Mitochondrial transcription termination factor-like
TraesCS6A01G032200	chr6A:15933325..15935266 (- strand)	Mitochondrial transcription termination factor-like
TraesCS6A01G032300	chr6A:15935482..15940102 (- strand)	Mitochondrial transcription termination factor-like
TraesCS6A01G032400	chr6A:15951566..15953536 (- strand)	High affinity nitrate transporter
TraesCS6A01G032500	chr6A:16098637..16100163 (- strand)	High affinity nitrate transporter
